# Supplementary material for: TM4SF1-AS1 inhibits apoptosis by promoting stress granule formation in cancer cells
Source: PubMed Central journal article supplement (PMC10345132; doi:10.1038/s41419-023-05953-3), 2023-07-13

Figure 3

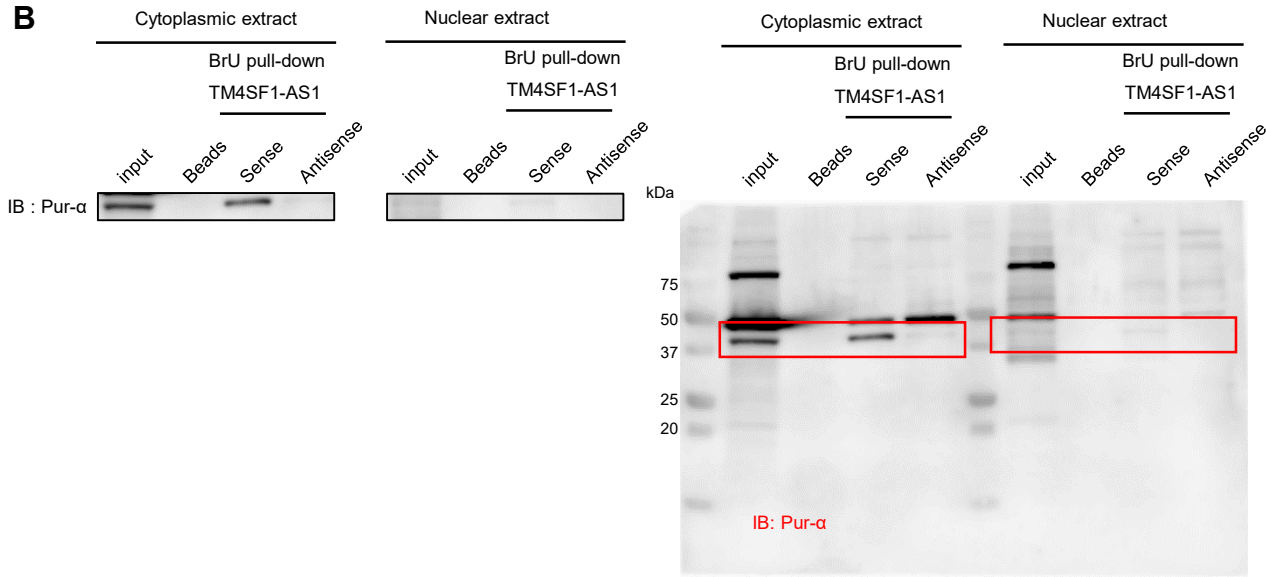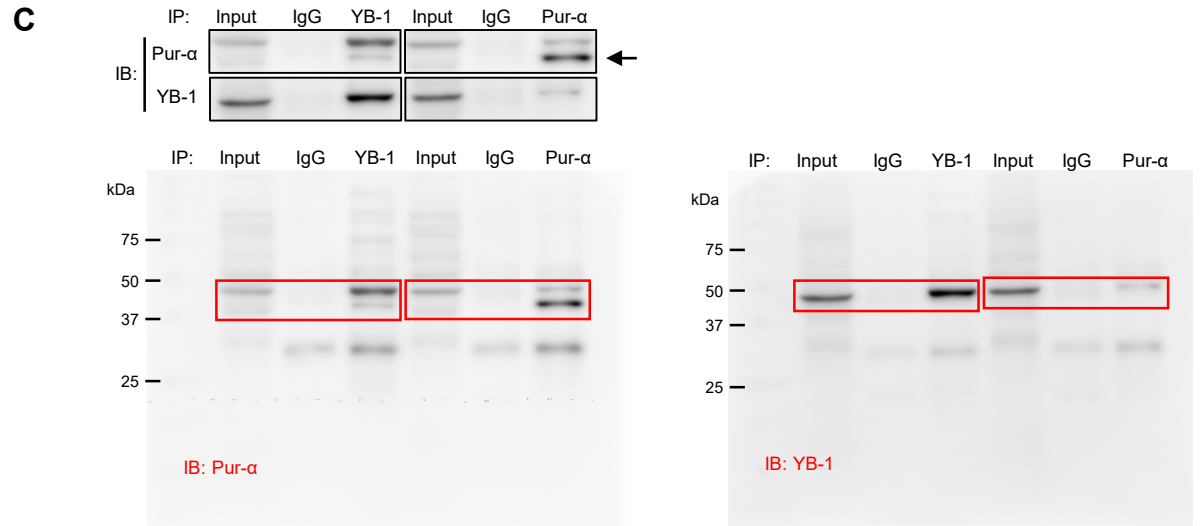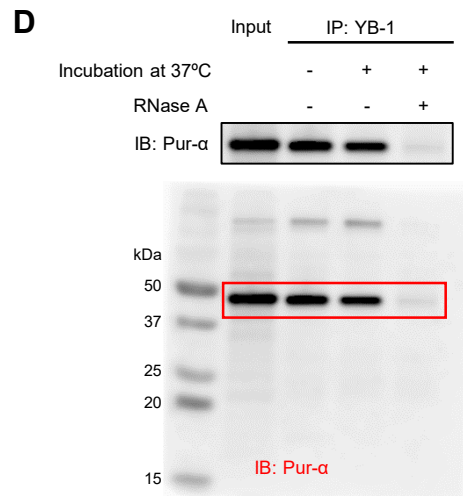

Figure 3

**E**

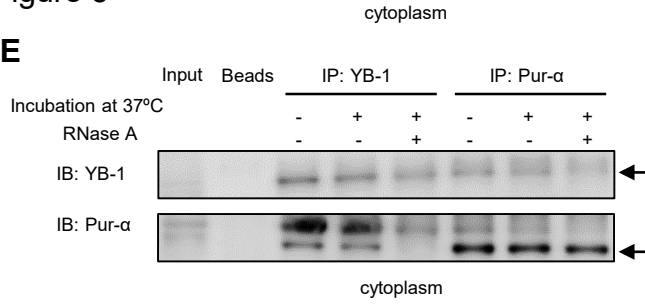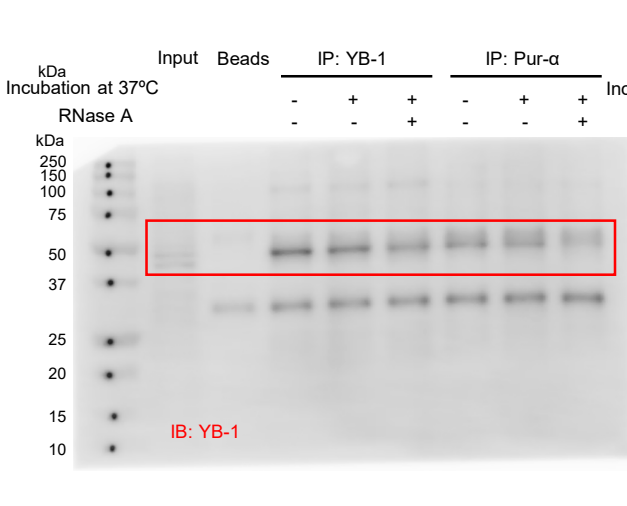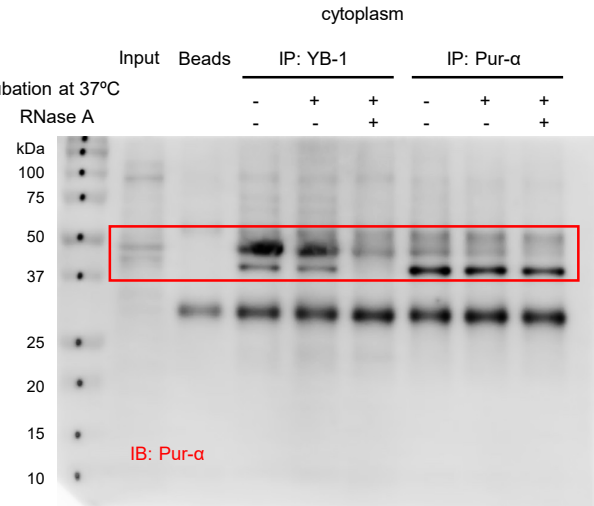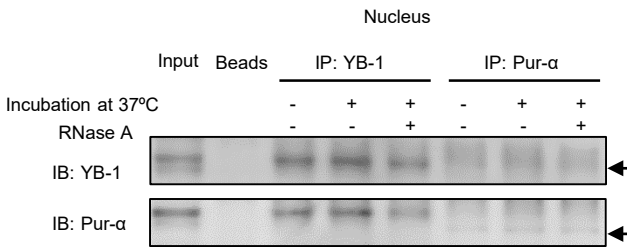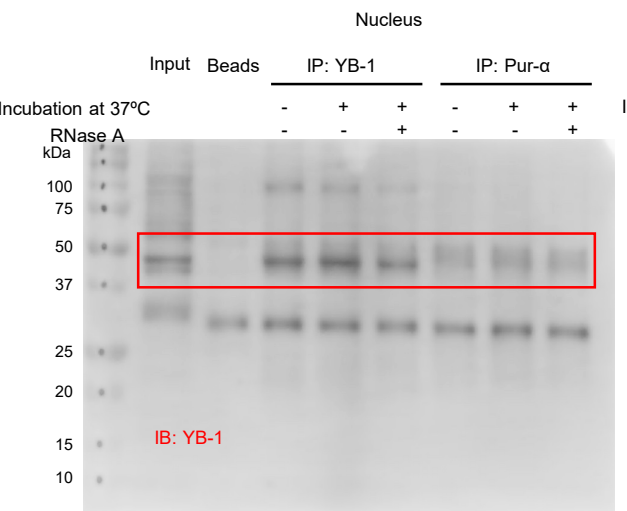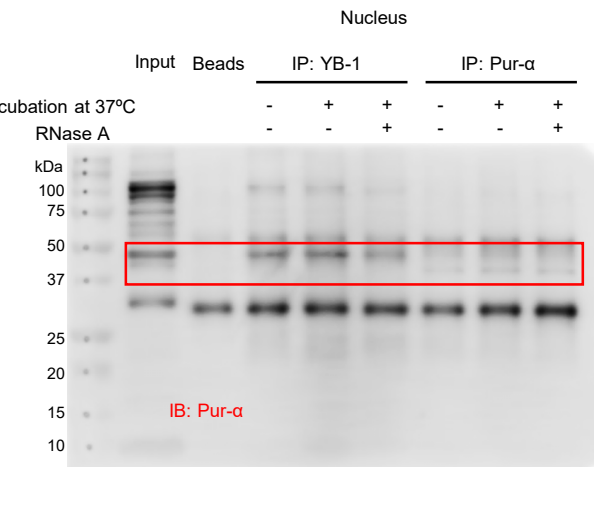

Figure 4

**E**

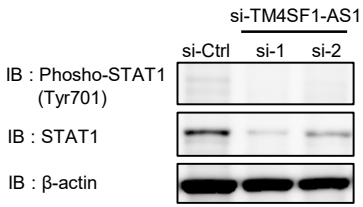

**H**

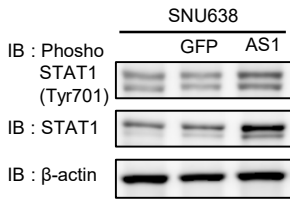

**H**

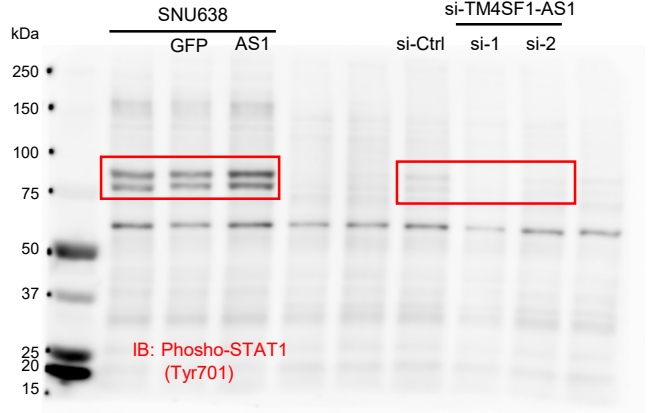

**E**

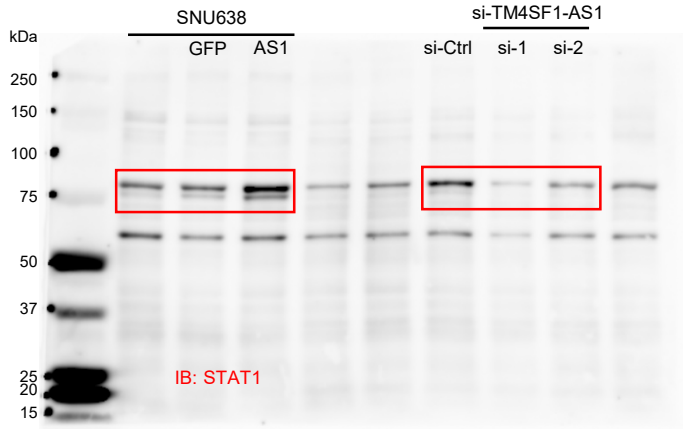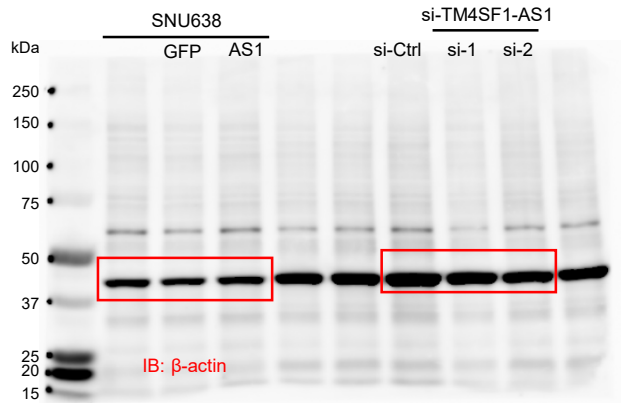

Figure 4

**J**

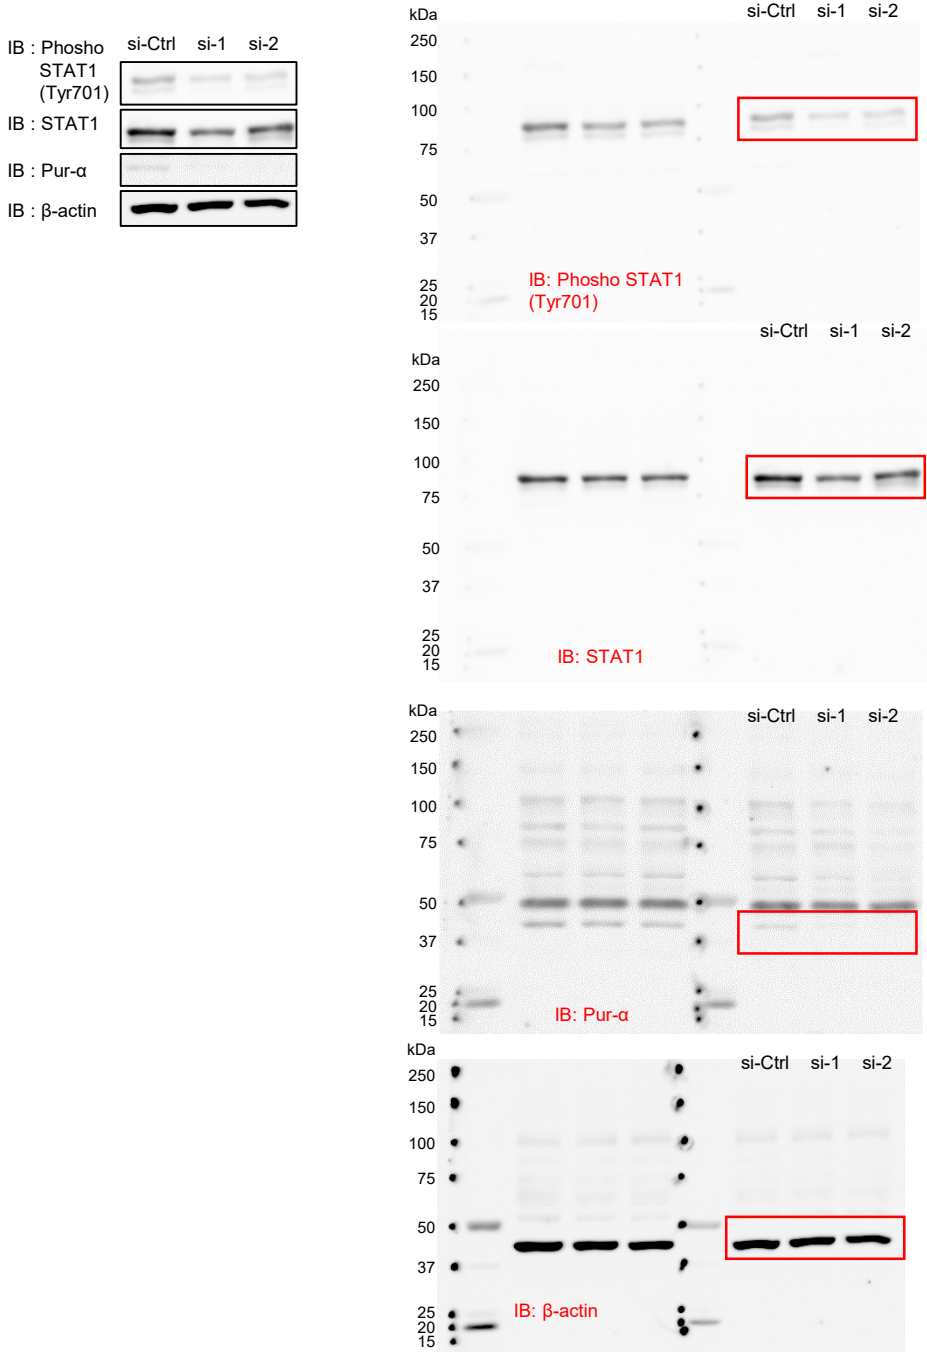

Figure 6

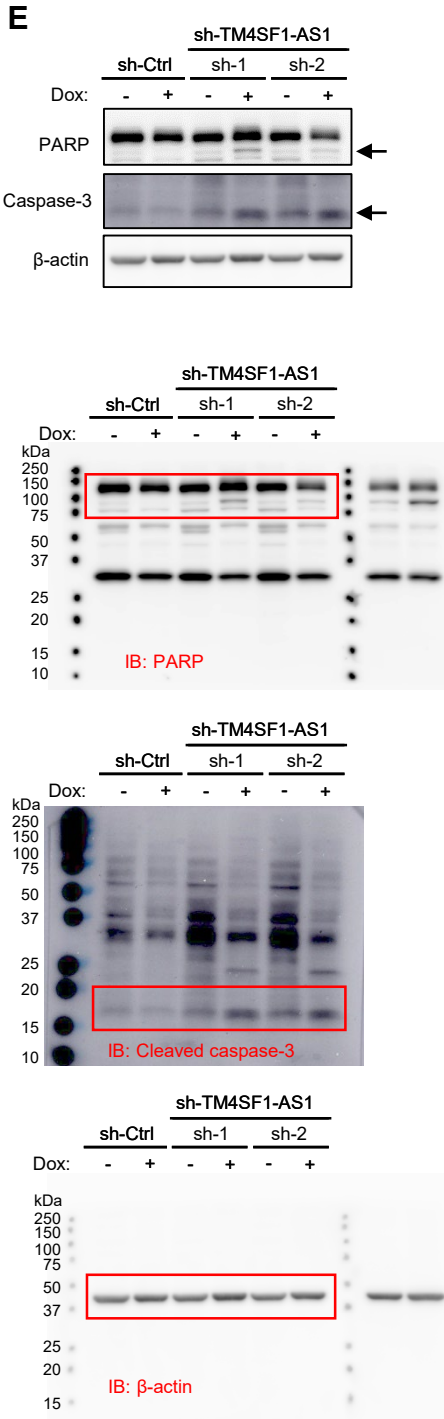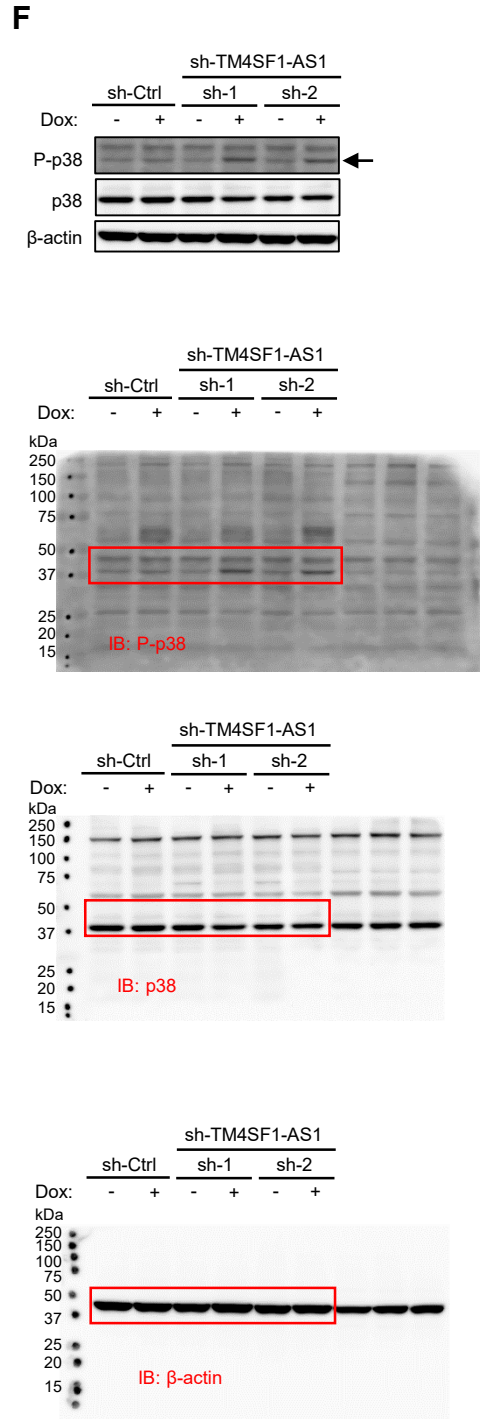

Figure 7

**F**

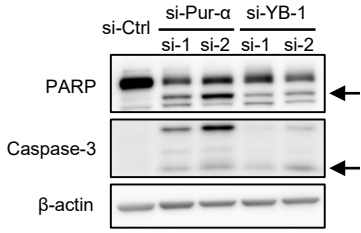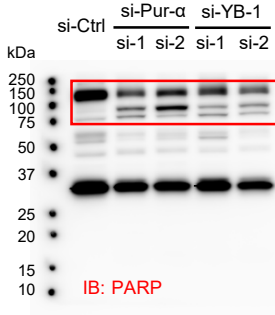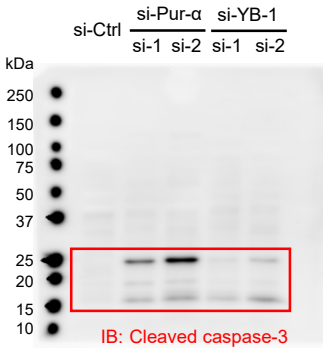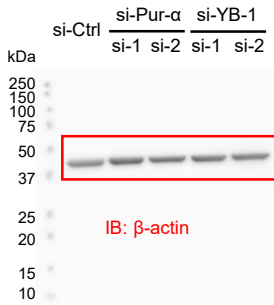

**G**

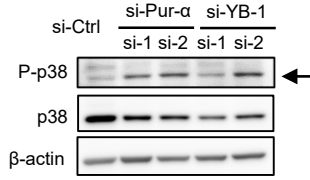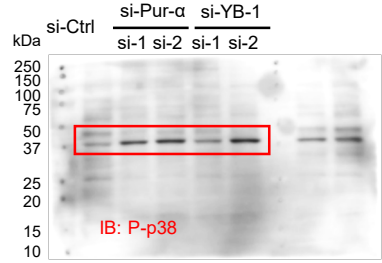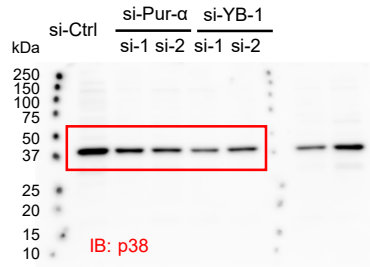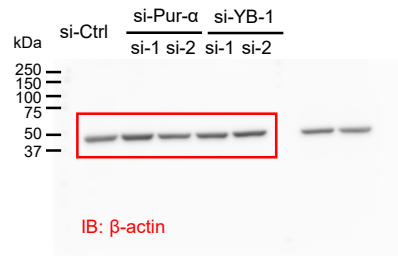

Supplementary Figure S4

**C**

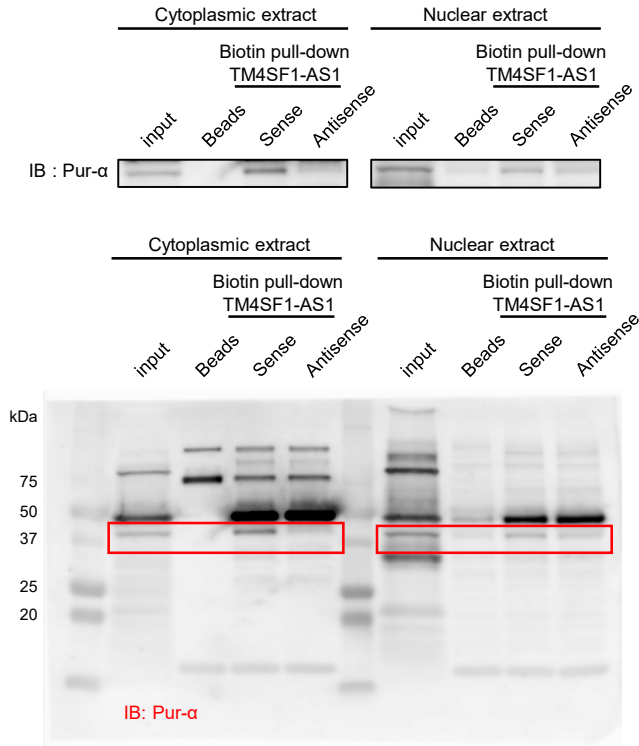

**D**

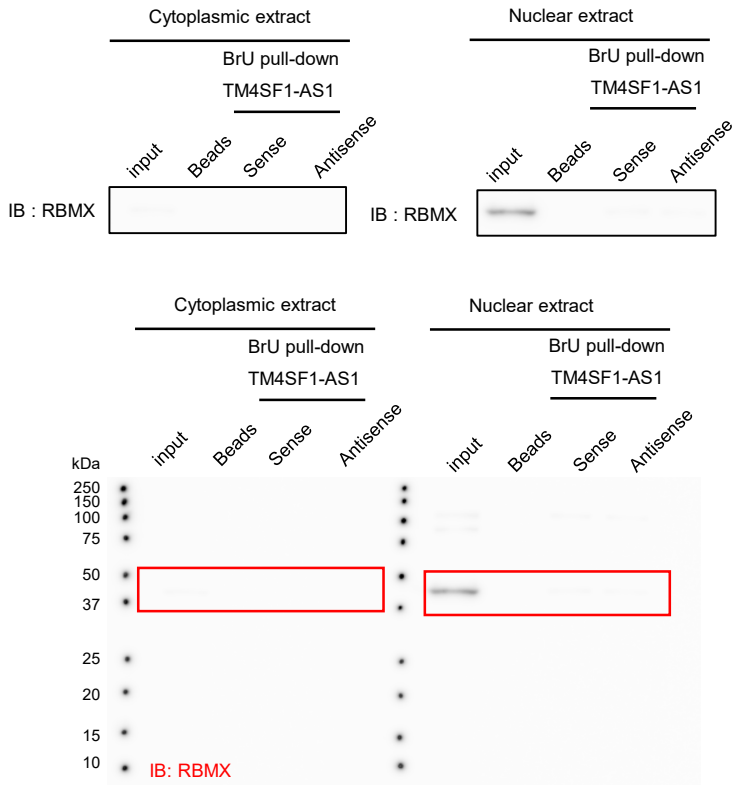

Supplementary Figure S4

**D**

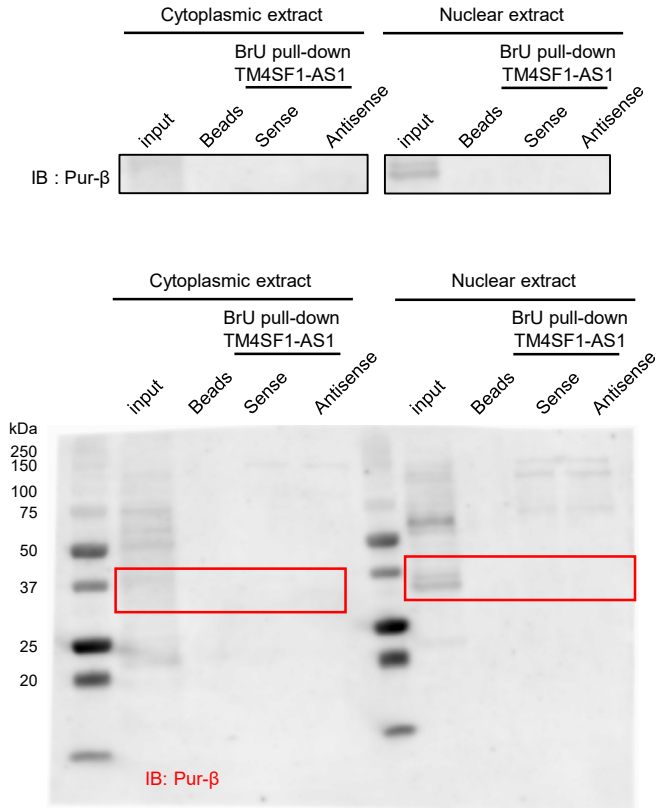

**E**

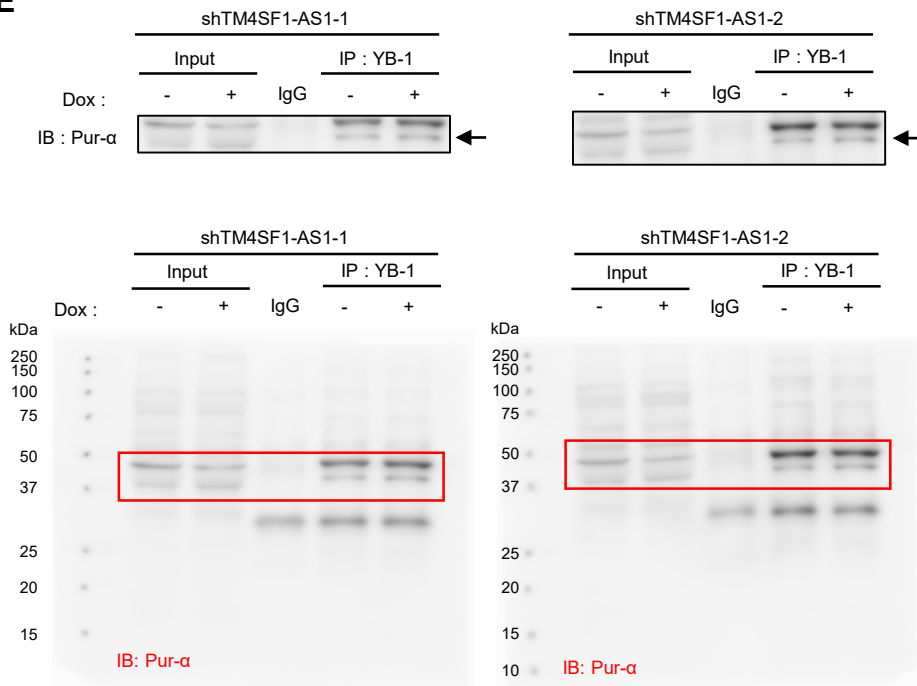



Supplementary Figure S4

**F**

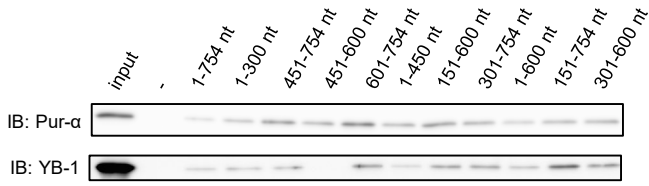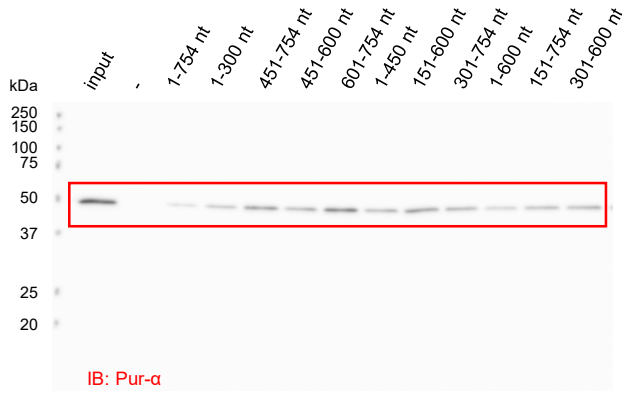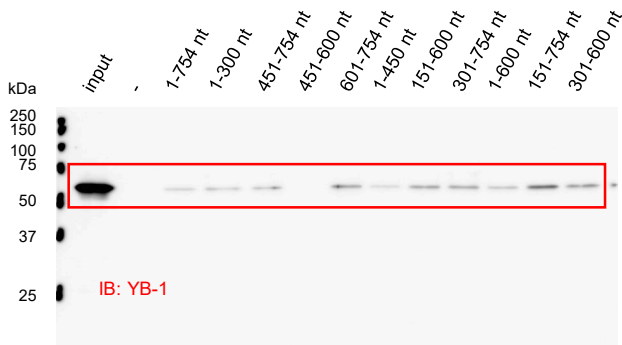

Supplementary Figure S10

Supplementary Figure S11

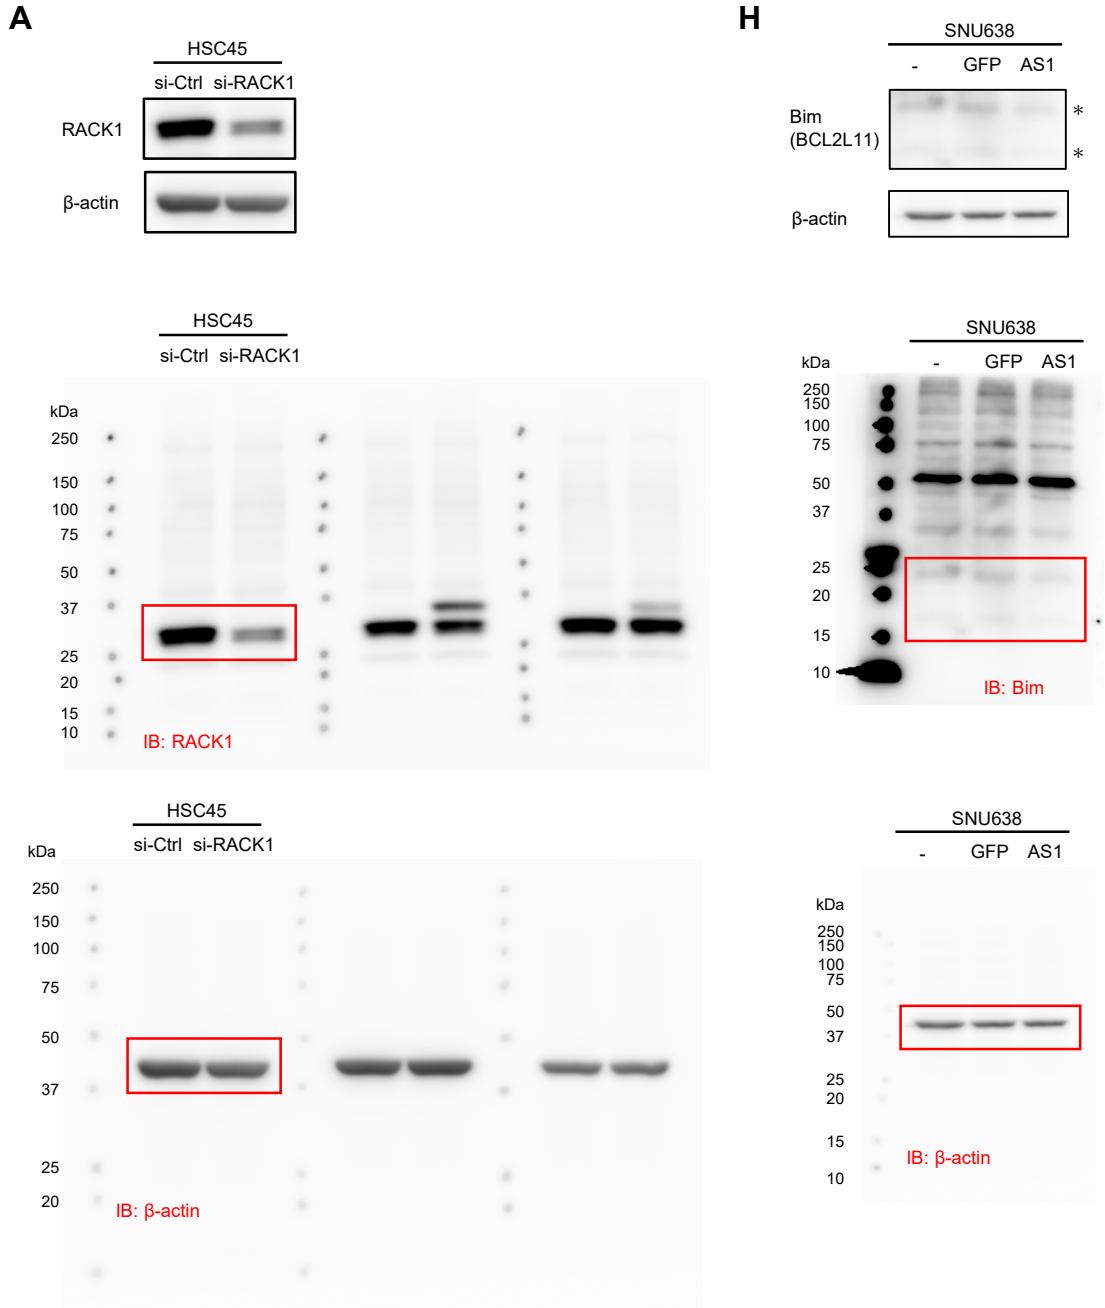

Supplement: 41419_2023_5953_MOESM4_ESM.pdf [file 41419_2023_5953_MOESM4_ESM.pdf]
