# Supplementary material for: TM4SF1-AS1 inhibits apoptosis by promoting stress granule formation in cancer cells
Source: PubMed Central journal article supplement (PMC10345132; doi:10.1038/s41419-023-05953-3), 2023-07-13
Supplement: 41419_2023_5953_MOESM2_ESM.pdf [file 41419_2023_5953_MOESM2_ESM.pdf]

Supplementary Table S1. Sequences of the primers used in this study

|                        |         |                                          |
|------------------------|---------|------------------------------------------|
| qRT-PCR                |         |                                          |
| TM4SF1-AS1             | Forward | 5'-AACAGAGGTGGCATCAGTCAA-3'              |
|                        | Reverse | 5'-TGGCATCTTCAACTCCCAACT-3'              |
| TM4SF1                 | Forward | 5'-ATGCCTCCGAAAACACCTC-3'                |
|                        | Reverse | 5'-GTCATCCTGTTCCAGCCCAA-3'               |
| TCONS_9689             | Forward | 5'-TCAGCAGAAAAGGGAGGACA-3'               |
|                        | Reverse | 5'-TCCAGCACAAAGTTTACATCAGT-3'            |
| TCONS_11229            | Forward | 5'-TGATTTTGGCGATGGTTTCAC-3'              |
|                        | Reverse | 5'-GGCAGGATTACTTCACAGCA-3'               |
| TCONS_21627            | Forward | 5'-CCGAAGACTTGCAGGGTAAGAA-3'             |
|                        | Reverse | 5'-CTGTCCCATGCCCAAAG-3'                  |
| TCONS_4302             | Forward | 5'-AAACTGCCGCGATGAATGTC-3'               |
|                        | Reverse | 5'-TGGAGGGACAGAGTTCTCAGA-3'              |
| TCONS_21520            | Forward | 5'-TTCATTTACATGGGGTGAGCA-3'              |
|                        | Reverse | 5'-TTGAGTGCAAGTTGTCCAGA-3'               |
| TCONS_9370             | Forward | 5'-GCCGAAGTCAATCAAGAGT-3'                |
|                        | Reverse | 5'-ATGTCCTTGAGAATCCACTGG-3'              |
| TCONS_24597            | Forward | 5'-CCGGTCCCCAGATTCTTGAC-3'               |
|                        | Reverse | 5'-CCCGTGTCTGATCCCTTTCC-3'               |
| TCONS_250              | Forward | 5'-CCTTGTGCTCTCAGAACTCCA-3'              |
|                        | Reverse | 5'-TCCCTGCACTGTGGTCAAAG-3'               |
| TCONS_24194            | Forward | 5'-CCGACATCAGTGAGAAGGAGG-3'              |
|                        | Reverse | 5'-GAGCAGGGCATGGAGAGAC-3'                |
| TCONS_280              | Forward | 5'-TGAGTGAAAGAGAGAGGGGAC-3'              |
|                        | Reverse | 5'-CATCTTGTACATGCTGCCA-3'                |
| TCONS_14492            | Forward | 5'-AGAGTGAGGATATCTTGAGCC-3'              |
|                        | Reverse | 5'-TCTGTAGTCTGTCCGCTTGG-3'               |
| TCONS_1775             | Forward | 5'-CGCAGTGGATCATGATGGA-3'                |
|                        | Reverse | 5'-CCTACAGGCTCACATTCTTCA-3'              |
| TCONS_15742            | Forward | 5'-TCGGGGTCCCTGCATTTAGTG-3'              |
|                        | Reverse | 5'-ATGCCGTTCTCCTTGCAGAA-3'               |
| TCONS_19352            | Forward | 5'-GCAGACATGGGATAACTTTAAGG-3'            |
|                        | Reverse | 5'-TTTATACCAGCCTGCCAATGT-3'              |
| PURA                   | Forward | 5'-ACATCCAGAACAAGCGCTTC-3'               |
|                        | Reverse | 5'-GGAGAGAGTAAGGCGGCTC-3'                |
| YBX1                   | Forward | 5'-GGGTGCAGGAGAACAAGGTA-3'               |
|                        | Reverse | 5'-TTAGGGTTTTCTGGGCTCT-3'                |
| RACK1                  | Forward | TCTCCTCAGATGGCCAGTTT                     |
|                        | Reverse | GCTCTCATCCTGGACAGTGT                     |
| BST2                   | Forward | 5'-GCAACAAGAGCTGACCGAG-3'                |
|                        | Reverse | 5'-AGCTCCTCCACTTTCTTTGTC-3'              |
| IFI44L                 | Forward | 5'-CTTCTCAAAGCCGGGTCATG-3'               |
|                        | Reverse | 5'-AACGCTCTCTCAATTGCACC-3'               |
| IFIT3                  | Forward | 5'-ACGGAGAAAACATCAGCTGA-3'               |
|                        | Reverse | 5'-TGACCTCACTCATGACTGCC-3'               |
| IFITM1                 | Forward | 5'-TCCACCGTGATCAACATCCA-3'               |
|                        | Reverse | 5'-CCAACCATCTTCTGTCCCT-3'                |
| HERC5                  | Forward | 5'-ACAGTTCACATCCCACCATAG-3'              |
|                        | Reverse | 5'-TCATTTGTAGTCTGTGAGTTCT-3'             |
| IFI6                   | Forward | 5'-TTACTCGCTGCTGTGCCAT-3'                |
|                        | Reverse | 5'-CAGGTAGCACAAAAGCGA-3'                 |
| IFIT1                  | Forward | 5'-ACGGCTGCCTAATTTACAGCA-3'              |
|                        | Reverse | 5'-GGATAACTCCCATGTAAAGTGA-3'             |
| SCL15A3                | Forward | 5'-CTTCCAGATGCAGTCCACCT-3'               |
|                        | Reverse | 5'-GGTGGATGTAGTGAAGCGC-3'                |
| OAS1                   | Forward | 5'-CAAGAGCCTCATCCGCCTAG-3'               |
|                        | Reverse | 5'-TGTTTTTCATGCTCCCTCGCT-3'              |
| MX2                    | Forward | 5'-TCTTCGGTTTTCTCCTTTACTGA-3'            |
|                        | Reverse | 5'-CCATTCTCTCGGAGCATAAAACT-3'            |
| IFNA1                  | Forward | 5'-GTCCTCCATGAGCTGATCCA-3'               |
|                        | Reverse | 5'-CTGGTAGAGTTCCGGTGCAGA-3'              |
| IFNA2                  | Forward | 5'-GAAACCATCCCTGTCTCCA-3'                |
|                        | Reverse | 5'-TATCACACAGGCTTCCAGGT-3'               |
| IFNB1                  | Forward | 5'-CTGCAACCTTTCGAAGCCTT-3'               |
|                        | Reverse | 5'-AGTGGAGAAGCACAAACAGGA-3'              |
| IFNL1                  | Forward | 5'-GGAATTGGGACCTGAGGCTT-3'               |
|                        | Reverse | 5'-GTGTGAAGGGGCTGGTCTAG-3'               |
| IFNL2                  | Forward | 5'-TAAGAGGGCCAAAGATGCCT-3'               |
|                        | Reverse | 5'-CTCAGCCTCCAAAGCCATG-3'                |
| ACTB                   | Forward | 5'-GCCAACCAGGAGGATGA-3'                  |
|                        | Reverse | 5'-AGCACAGCCTGGATAGCAAC-3'               |
| U6 snRNA               | Forward | 5'-GCTCGCTTCAGCAGCATA-3'                 |
|                        | Reverse | 5'-TTTGTGTGCATCCTTACGC-3'                |
| Vector construction    |         |                                          |
| Full length TM4SF1-AS1 | Forward | 5'-GATCCGCTAGGGATCCCTTCAGACGAAATCCTTG-3' |

|                                      |         |                                                                  |
|--------------------------------------|---------|------------------------------------------------------------------|
| Full length PURA                     | Reverse | 5'-TATCGTCGACAAGCTTTATAGTACGACACTTTTTAATT-3'                     |
|                                      | Forward | 5'-AGATCTGCCGCCGCGATCGCCATGGCCGACCGAG-3'                         |
| Full length YBX1                     | Reverse | 5'-GCGGCCGCGTACGCGCATCTTCTCCCTTCTCCTCACCTGC-3'                   |
|                                      | Forward | 5'-AGATCTGCCGCCGCGATCGCCATGAGCAGCGAGGCCG-3'                      |
| MS2 tag                              | Reverse | 5'-GCGGCCGCGTACGCGACTCAGCCCCGCC-3'                               |
|                                      | Forward | 5'-GTCATAACCGGTTGAGTAGGCTAACAGAATTCGCATGGACGAGCTGTACAAGTCTAAG-3' |
| Templates for in vitro transcription |         |                                                                  |
| T7 TM4SF1-AS1 full length            | Forward | 5'-CTAATACGACTCACTATAGGGAGACCTTCAGACGAAATCCTTGG-3'               |
|                                      | Reverse | 5'-TATAGTACGACACTTTTTAATTCAGAAC-3'                               |
| T7 TM4SF1-AS1 antisense              | Forward | 5'-CTAATACGACTCACTATAGGGAGATATAGTACGACACTTTTTAAT-3'              |
|                                      | Reverse | 5'-CCTTCAGACGAAATCCTTGG-3'                                       |
| T7 TM4SF1-AS1 1-300 nt               | Forward | 5'-CTAATACGACTCACTATAGGGAGACCTTCAGACGAAATCCTTGG-3'               |
|                                      | Reverse | 5'-AAATCAGCACAAAGGTAGAAATG-3'                                    |
| T7 TM4SF1-AS1 451-754 nt             | Forward | 5'-CTAATACGACTCACTATAGGGAGAGATTTTCAGTGTTCAGCGTCC-3'              |
|                                      | Reverse | 5'-TATAGTACGACACTTTTTAATTCAGAAC-3'                               |
| T7 TM4SF1-AS1 451-600 nt             | Forward | 5'-CTAATACGACTCACTATAGGGAGAGATTTTCAGTGTTCAGCGTCC-3'              |
|                                      | Reverse | 5'-TCTCACTGGTCTGAACTTCA-3'                                       |
| T7 TM4SF1-AS1 601-754 nt             | Forward | 5'-CTAATACGACTCACTATAGGGAGAGCCATCATTGGGAGTTGAA-3'                |
|                                      | Reverse | 5'-TATAGTACGACACTTTTTAATTCAGAAC-3'                               |
| T7 TM4SF1-AS1 1-450 nt               | Forward | 5'-CTAATACGACTCACTATAGGGAGACCTTCAGACGAAATCCTTGG-3'               |
|                                      | Reverse | 5'-CATCCTGCAGAGCTTGCTGT-3'                                       |
| T7 TM4SF1-AS1 151-600 nt             | Forward | 5'-CTAATACGACTCACTATAGGGAGACATGACTTTCCAGTAACTGC-3'               |
|                                      | Reverse | 5'-TCTCACTGGTCTGAACTTCA-3'                                       |
| T7 TM4SF1-AS1 301-754 nt             | Forward | 5'-CTAATACGACTCACTATAGGGAGAAAATTTACAACCTGGGGCAAA-3'              |
|                                      | Reverse | 5'-TATAGTACGACACTTTTTAATTCAGAAC-3'                               |
| T7 TM4SF1-AS1 1-600 nt               | Forward | 5'-CTAATACGACTCACTATAGGGAGACCTTCAGACGAAATCCTTGG-3'               |
|                                      | Reverse | 5'-TCTCACTGGTCTGAACTTCA-3'                                       |
| T7 TM4SF1-AS1 151-754 nt             | Forward | 5'-CTAATACGACTCACTATAGGGAGACATGACTTTCCAGTAACTGC-3'               |
|                                      | Reverse | 5'-TATAGTACGACACTTTTTAATTCAGAAC-3'                               |
| T7 TM4SF1-AS1 301-600 nt             | Forward | 5'-CTAATACGACTCACTATAGGGAGAAAATTTACAACCTGGGGCAAA-3'              |
|                                      | Reverse | 5'-TCTCACTGGTCTGAACTTCA-3'                                       |

---

Supplementary Table S2. LncRNA genes with GC patient-specific H3K4me3 peaks

| Chr   | Start     | End       | ID                                                                                                                                              |
|-------|-----------|-----------|-------------------------------------------------------------------------------------------------------------------------------------------------|
| Chr1  | 95427112  | 95429222  | TCONS_00000250                                                                                                                                  |
| Chr1  | 115641025 | 115642906 | TCONS_00000280                                                                                                                                  |
| Chr1  | 150134803 | 150135890 | TCONS_00002160,TCONS_00002161                                                                                                                   |
| Chr1  | 198900409 | 198907406 | TCONS_00000111                                                                                                                                  |
| Chr1  | 203395100 | 203398859 | TCONS_00001775                                                                                                                                  |
| Chr2  | 36581486  | 36582638  | TCONS_00004205,TCONS_00005129                                                                                                                   |
| Chr2  | 48133031  | 48135298  | TCONS_00002890, TCONS_00003671,TCONS_00002891                                                                                                   |
| Chr2  | 70369788  | 70370967  | TCONS_00004302                                                                                                                                  |
| Chr2  | 107159250 | 107160111 | TCONS_00003811,TCONS_00002968                                                                                                                   |
| Chr2  | 158733227 | 158734311 | TCONS_00003916                                                                                                                                  |
| Chr3  | 96335577  | 96337503  | TCONS_00006915,TCONS_00006916,TCONS_00006917,TCONS_00006918,<br>TCONS_00006919, TCONS_00007197,TCONS_00006556,TCONS_00007198,<br>TCONS_00007196 |
| Chr3  | 148942510 | 148943541 | TCONS_00006262, TCONS_00006262                                                                                                                  |
| Chr3  | 149090296 | 149097098 | TCONS_00006264,TCONS_00005618                                                                                                                   |
| Chr4  | 56244631  | 56246023  | TCONS_00008077                                                                                                                                  |
| Chr4  | 177301354 | 177302218 | TCONS_00008342                                                                                                                                  |
| Chr5  | 23012420  | 23014631  | TCONS_00009370                                                                                                                                  |
| Chr5  | 68338248  | 68339980  | TCONS_00009689                                                                                                                                  |
| Chr6  | 114192942 | 114195312 | TCONS_00011229,TCONS_00012260                                                                                                                   |
| Chr7  | 6992755   | 6993974   | TCONS_00013687                                                                                                                                  |
| Chr7  | 27400765  | 27405627  | TCONS_00013398,TCONS_00012984                                                                                                                   |
| Chr8  | 58657462  | 58658945  | TCONS_00014492                                                                                                                                  |
| Chr9  | 109984131 | 109986116 | TCONS_00016664                                                                                                                                  |
| Chr9  | 111033974 | 111035359 | TCONS_00016128                                                                                                                                  |
| Chr9  | 120544924 | 120546276 | TCONS_00015742                                                                                                                                  |
| Chr10 | 4092962   | 4094242   | TCONS_00017698,TCONS_00018092                                                                                                                   |
| Chr10 | 13568821  | 13570394  | TCONS_00018885,TCONS_00018887,TCONS_00018889,<br>TCONS_00018886,TCONS_00018888,TCONS_00018890                                                   |
| Chr10 | 54788321  | 54790861  | TCONS_00018519,TCONS_00018936,TCONS_00018518,TCONS_00018520                                                                                     |
| Chr10 | 124132991 | 124134068 | TCONS_00018622                                                                                                                                  |
| Chr11 | 3532516   | 3535098   | TCONS_00019829                                                                                                                                  |
| Chr11 | 13007338  | 13008572  | TCONS_00019581                                                                                                                                  |
| Chr11 | 67651246  | 67655841  | TCONS_00019351,TCONS_00019099,TCONS_00019352, TCONS_00019353                                                                                    |
| Chr12 | 70218378  | 70223384  | TCONS_00020467                                                                                                                                  |
| Chr12 | 89412960  | 89413856  | TCONS_00020217                                                                                                                                  |
| Chr12 | 90340550  | 90342179  | TCONS_00020510                                                                                                                                  |
| Chr12 | 98884043  | 98885461  | TCONS_00020891                                                                                                                                  |
| Chr13 | 30994874  | 30997404  | TCONS_00021627                                                                                                                                  |
| Chr13 | 76443989  | 76445794  | TCONS_00021496                                                                                                                                  |
| Chr13 | 80704943  | 80705863  | TCONS_00021857                                                                                                                                  |
| Chr13 | 100146085 | 100149723 | TCONS_00022096,TCONS_00021520,TCONS_00021692,TCONS_00022097                                                                                     |
| Chr13 | 114567037 | 114568086 | TCONS_00021917,TCONS_00021918, TCONS_00021919                                                                                                   |
| Chr14 | 86400375  | 86402330  | TCONS_00022573,TCONS_00022574,TCONS_00022575                                                                                                    |
| Chr14 | 99752711  | 99753973  | TCONS_00023171,TCONS_00022868                                                                                                                   |
| Chr15 | 85872548  | 85874187  | TCONS_00023765,TCONS_00024194                                                                                                                   |
| Chr16 | 19402889  | 19405408  | TCONS_00024975,TCONS_00024596,TCONS_00024597                                                                                                    |
| Chr16 | 21244261  | 21247836  | TCONS_00024600                                                                                                                                  |
| Chr17 | 6839133   | 6840683   | TCONS_00025293                                                                                                                                  |
| Chr17 | 41392072  | 41393621  | TCONS_00025394                                                                                                                                  |
| Chr17 | 76982319  | 76983553  | TCONS_00025519                                                                                                                                  |
| ChrX  | 20007586  | 20008754  | TCONS_00016924, TCONS_00017045                                                                                                                  |
| ChrX  | 46185477  | 46187385  | TCONS_00017499, TCONS_00017498,TCONS_00017315,TCONS_00016948,<br>TCONS_00017501,TCONS_00017500,TCONS_00017503                                   |

Supplementary Table S3. LncRNA genes with healthy individual-specific H3K4me3 peaks

| Chr   | Start     | End       | ID                                                                                                                                                            |
|-------|-----------|-----------|---------------------------------------------------------------------------------------------------------------------------------------------------------------|
| Chr1  | 1980260   | 1981602   | TCONS_00000453,TCONS_00001374                                                                                                                                 |
| Chr1  | 12587336  | 12589135  | TCONS_00000840,TCONS_00000154                                                                                                                                 |
| Chr1  | 27560250  | 27560883  | TCONS_00000491,TCONS_00002324                                                                                                                                 |
| Chr1  | 90097700  | 90098529  | TCONS_00000019,TCONS_00002404,TCONS_00001571,TCONS_00001572,<br>TCONS_00001573,TCONS_00001574,TCONS_00001570                                                  |
| Chr1  | 110751973 | 110752732 | TCONS_00000601                                                                                                                                                |
| Chr1  | 224803982 | 224805879 | TCONS_00001841,TCONS_00001843,TCONS_00001842,TCONS_00000744                                                                                                   |
| Chr2  | 3580318   | 3581850   | TCONS_00003159,TCONS_00003157,TCONS_00003158                                                                                                                  |
| Chr2  | 11484856  | 11485862  | TCONS_00003574                                                                                                                                                |
| Chr2  | 118560941 | 118562232 | TCONS_00003385                                                                                                                                                |
| Chr2  | 118593521 | 118595010 | TCONS_00002986,TCONS_00003824, TCONS_00002987                                                                                                                 |
| Chr3  | 50303118  | 50305928  | TCONS_00005774,TCONS_00006510                                                                                                                                 |
| Chr3  | 52278546  | 52279751  | TCONS_00006852                                                                                                                                                |
| Chr3  | 64430087  | 64430944  | TCONS_00005531,TCONS_00006042                                                                                                                                 |
| Chr3  | 64431321  | 64431546  | TCONS_00005531,TCONS_00006042                                                                                                                                 |
| Chr5  | 65220394  | 65221364  | TCONS_00010939                                                                                                                                                |
| Chr6  | 16128406  | 16129117  | TCONS_00012092                                                                                                                                                |
| Chr6  | 168226066 | 168227574 | TCONS_00011616,TCONS_00011145                                                                                                                                 |
| Chr6  | 169845451 | 169848101 | TCONS_00012371                                                                                                                                                |
| Chr6  | 170124883 | 170125929 | TCONS_00011423, TCONS_00011627,TCONS_00012835,TCONS_00012374                                                                                                  |
| Chr7  | 99594506  | 99595878  | TCONS_00013553, TCONS_00013554                                                                                                                                |
| Chr7  | 129780701 | 129782541 | TCONS_00013078 & TCONS_00013079                                                                                                                               |
| Chr8  | 66933546  | 66934297  | TCONS_00015445,TCONS_00015028,TCONS_00015444                                                                                                                  |
| Chr8  | 103539814 | 103541581 | TCONS_00014814                                                                                                                                                |
| Chr8  | 103817959 | 103818930 | TCONS_00014499                                                                                                                                                |
| Chr10 | 31892593  | 31893366  | TCONS_00018154,TCONS_00017809                                                                                                                                 |
| Chr10 | 110225476 | 110226162 | TCONS_00018600                                                                                                                                                |
| Chr11 | 63578994  | 63580794  | TCONS_00019653                                                                                                                                                |
| Chr12 | 2044679   | 2046115   | TCONS_00020202                                                                                                                                                |
| Chr12 | 7281616   | 7284190   | TCONS_00021281,TCONS_00021280                                                                                                                                 |
| Chr12 | 125226720 | 125228068 | TCONS_00020613                                                                                                                                                |
| Chr12 | 127630330 | 127631554 | TCONS_00020983, TCONS_00020642,TCONS_00020643,TCONS_00021254                                                                                                  |
| Chr13 | 30170059  | 30170597  | TCONS_00021740                                                                                                                                                |
| Chr13 | 44946598  | 44947682  | TCONS_00021985                                                                                                                                                |
| Chr13 | 44947868  | 44948294  | TCONS_00021985                                                                                                                                                |
| Chr14 | 38066771  | 38069856  | TCONS_00022712                                                                                                                                                |
| Chr15 | 41244346  | 41247548  | TCONS_00023380                                                                                                                                                |
| Chr15 | 90645776  | 90646707  | TCONS_00024004                                                                                                                                                |
| Chr16 | 56676761  | 56678008  | TCONS_00024856,TCONS_00024857,TCONS_00024226,TCONS_00024227                                                                                                   |
| Chr17 | 33639897  | 33641975  | TCONS_00025355,TCONS_00025356,TCONS_00025358,TCONS_00025359,<br>TCONS_00025360,TCONS_00025361,TCONS_00025896                                                  |
| Chr19 | 38041513  | 38042966  | TCONS_00027356                                                                                                                                                |
| Chr20 | 25227272  | 25228671  | TCONS_00028353                                                                                                                                                |
| Chr20 | 39764878  | 39765864  | TCONS_00028390                                                                                                                                                |
| Chr21 | 9539885   | 9540567   | TCONS_00029067                                                                                                                                                |
| Chr21 | 9540626   | 9541349   | TCONS_00029067                                                                                                                                                |
| Chr21 | 10596138  | 10602364  | TCONS_00029076                                                                                                                                                |
| Chr21 | 46707245  | 46708193  | TCONS_00029056,TCONS_00028752,TCONS_00029246,TCONS_00028858,<br>TCONS_00029057,TCONS_00029058,TCONS_00029059,TCONS_00029247,<br>TCONS_00029248,TCONS_00029249 |
| Chr22 | 45664187  | 45665015  | TCONS_00029720                                                                                                                                                |
| Chr22 | 45665175  | 45665876  | TCONS_00029720                                                                                                                                                |
| Chr22 | 46409222  | 46410737  | TCONS_00029727                                                                                                                                                |
| ChrX  | 38080096  | 38080654  | TCONS_00016976                                                                                                                                                |
| ChrX  | 124338563 | 124340445 | TCONS_00017242                                                                                                                                                |

Supplementary Table S4. Results of targeted sequencing in primary GCs

| Patient   | Age | Gender | pT  | pN | pM | Histology  | Gene           | Chr   | Position  | Mutation | Region        | Normal var freq | Tumor var freq | P-value   |
|-----------|-----|--------|-----|----|----|------------|----------------|-------|-----------|----------|---------------|-----------------|----------------|-----------|
| Patient 1 | 77  | Female | T1a | N0 | M0 | Intestinal | MUC6           | Chr11 | 1013918   | C>T      | Exon          | 0.0011          | 0.3229         | 0         |
|           |     |        |     |    |    |            | TP53           | Chr17 | 7675146   | G>C      | Exon          | 0               | 0.6642         | 2.40E-47  |
| Patient 2 | 71  | Male   | T1a | N0 | M0 | Intestinal |                |       |           |          |               |                 |                |           |
| Patient 3 | 80  | Male   | T1a | N0 | M0 | Intestinal |                |       |           |          |               |                 |                |           |
| Patient 4 | 72  | Male   | T1a | N0 | M0 | Intestinal | MUC6           | Chr11 | 1018171   | T>G      | Exon          | 0.0436          | 0.2483         | 1.69E-31  |
|           |     |        |     |    |    |            | SEMA3B         | Chr3  | 50274058  | G>T      | Splice site   | 0               | 0.3911         | 0         |
| Patient 5 | 67  | Male   | T1a | N0 | M0 | Intestinal | TCONS_00021692 | Chr13 | 99500209  | T>A      | LncRNA intron | 0.0015          | 0.2061         | 1.73E-95  |
|           |     |        |     |    |    |            | TCONS_00021692 | Chr13 | 99500233  | A>T      | LncRNA intron | 0               | 0.2234         | 3.74E-112 |
| Patient 6 | 66  | Male   | T1a | N0 | M0 | Intestinal |                |       |           |          |               |                 |                |           |
| Patient 7 | 69  | Female | T1a | N0 | M0 | Intestinal | APC            | Chr5  | 112839942 | C>T      | Exon          | 0.0002          | 0.8129         | 0         |
| Patient 8 | 78  | Male   | T1b | N0 | M0 | Diffuse    | KRAS           | Chr12 | 25245348  | C>A      | Exon          | 0               | 0.303          | 0         |
|           |     |        |     |    |    |            | TM4SF1-AS1     | Chr3  | 149378727 | G>A      | LncRNA intron | 0.0008          | 0.2547         | 4.04E-236 |

Supplementary Table S5. Proteins detected with RNA pulldown-mass spectrometry analysis

| Accession | Symbol  | Name                                                | Unused ProtScore | Total ProtScore | %Cov  | Peptides (95%) |
|-----------|---------|-----------------------------------------------------|------------------|-----------------|-------|----------------|
| P38159    | RBMX    | RNA binding motif protein X-linked                  | 37.69            | 37.69           | 68.29 | 18             |
| Q5U0P9    | PURA    | purine rich element binding protein A               | 10.04            | 10.04           | 19.88 | 5              |
| Q96QR8    | PURB    | purine rich element binding protein B               | 9.4              | 9.4             | 18.91 | 5              |
| P31942    | HNRNPH3 | heterogeneous nuclear ribonucleoprotein H3          | 8.14             | 8.14            | 24.86 | 5              |
| Q6PJV9    | SPOUT1  | SPOUT domain containing methyltransferase 1         | 3.05             | 3.05            | 9.31  | 1              |
| Q8N8Y7    | RBMX    | RNA binding motif protein X-linked                  | 2.96             | 2.96            | 21.43 | 1              |
| Q9P1N0    | ILF2    | interleukin enhancer binding factor 2               | 2.02             | 2.02            | 8.55  | 1              |
| Q8NFG3    | BX1     | BX1 (Fragment)                                      | 2                | 2               | 34.92 | 1              |
| Q86U45    | HNRNPC  | heterogeneous nuclear ribonucleoprotein C           | 2                | 2               | 15.49 | 1              |
| Q6IPF2    | HNRPA1  | heterogeneous nuclear ribonucleoprotein A1          | 2                | 2               | 14.06 | 1              |
| P67809    | YBX1    | Y-box binding protein 1                             | 2                | 2               | 7.1   | 1              |
| Q96AU2    | HNRNPF  | heterogeneous nuclear ribonucleoprotein F           | 2                | 2               | 3.86  | 1              |
| Q15717    | ELAVL1  | ELAV like RNA binding protein 1                     | 1.7              | 1.7             | 7.98  | 1              |
| Q16629    | SRSF7   | serine and arginine rich splicing factor 7          | 1.7              | 1.7             | 7.56  | 1              |
| Q96E39    | RBMXL1  | RNA binding motif protein, X-linked-like-1          | 1.16             | 27.15           | 65.13 | 13             |
| Q09666    | AHNAK   | Neuroblast differentiation-associated protein AHNAK | 0.59             | 0.59            | 3.48  | 0              |

Supplementary Table S6. Genes whose expression was altered by TM4SF1-AS1 knockdown in HSC45 cells

| Probe name     | Gene symbol      | Fold change | P value     |
|----------------|------------------|-------------|-------------|
| A_23_P60079    | ANGPT2           | 56.542145   | 3.75E-04    |
| A_33_P3392560  | LINC00871        | 21.436792   | 9.85E-04    |
| A_23_P362694   | FDCSP            | 17.13728    | 2.87E-04    |
| A_33_P3212394  | FRG2C            | 13.555448   | 0.001624912 |
| A_21_P0011905  | XLOC_I2_007898   | 12.141504   | 4.26E-04    |
| A_24_P623782   | FRG2             | 11.88117    | 7.22E-04    |
| A_23_P62741    | ELTD1            | 9.875498    | 0.002062708 |
| A_23_P50250    | CKM              | 9.430736    | 0.048435226 |
| A_21_P0014554  | LINC00871        | 8.888038    | 0.003780724 |
| A_33_P3251522  | AQPEP            | 8.882653    | 0.017847462 |
| A_33_P3371325  |                  | 8.625272    | 1.19E-04    |
| A_32_P108889   | DCLK1            | 8.517241    | 0.003204798 |
| A_23_P45185    | FIGF             | 8.419332    | 0.002760353 |
| A_19_P00318107 | XLOC_I2_015561   | 8.387398    | 5.06E-04    |
| A_21_P0012579  |                  | 8.226129    | 0.003014111 |
| A_33_P3387493  | FTH1P18          | 7.960307    | 2.76E-04    |
| A_33_P3362611  | ELTD1            | 7.84643     | 0.001022865 |
| A_21_P0007789  | LINC00944        | 7.340587    | 1.11E-04    |
| A_33_P3344831  | TMEM45A          | 7.212898    | 1.12E-04    |
| A_33_P3588134  | PANX2            | 7.0263      | 0.004622587 |
| A_33_P3375790  | RFPL4AL1         | 6.9913063   | 3.80E-04    |
| A_32_P130788   | SAMD13           | 6.9412413   | 0.001570887 |
| A_19_P00322479 | LOC644838        | 6.9039965   | 0.004889302 |
| A_32_P70927    | PAGE2            | 6.6864843   | 7.46E-04    |
| A_33_P3422968  | DNAH6            | 6.357939    | 1.84E-04    |
| A_23_P213319   | ADAMTS6          | 6.3126636   | 0.00119284  |
| A_21_P0009777  | LOC102723931     | 6.05687     | 7.41E-04    |
| A_33_P3695899  | FLJ31104         | 6.041572    | 0.006527758 |
| A_23_P133739   | HUS1B            | 6.025479    | 0.004538663 |
| A_23_P81898    | UBD              | 5.979295    | 1.33E-04    |
| A_23_P166269   | FAM3B            | 5.8751054   | 2.45E-04    |
| A_21_P0014172  | HIST1H4H         | 5.8618183   | 2.20E-04    |
| A_32_P46214    | SLC9A9           | 5.809666    | 8.04E-04    |
| A_23_P18649    | FAT4             | 5.805691    | 0.003092031 |
| A_33_P3366127  | RFPL4AL1         | 5.770718    | 2.45E-04    |
| A_21_P0007522  | lnc-CLEC2D-7     | 5.668402    | 0.005393999 |
| A_21_P0003513  |                  | 5.6087065   | 2.80E-04    |
| A_23_P62634    | RHCE             | 5.5533733   | 0.002315334 |
| A_24_P124624   | OLR1             | 5.5463915   | 0.00555151  |
| A_23_P163402   | CYP1A1           | 5.50868     | 1.66E-04    |
| A_33_P3299791  | LOC644838        | 5.4737597   | 0.002740083 |
| A_21_P0001200  |                  | 5.426798    | 0.006722334 |
| A_21_P0009499  | lnc-TIMM21-3     | 5.421073    | 6.24E-04    |
| A_32_P196263   | ADAMTS9          | 5.3953032   | 0.001285658 |
| A_21_P0013438  |                  | 5.3611803   | 0.007838416 |
| A_33_P3363260  | PGM2L1           | 5.3015766   | 6.58E-04    |
| A_23_P33326    | ADRA1B           | 5.2147183   | 0.021646084 |
| A_21_P0014071  | lnc-HIST2H2AA3-1 | 5.127367    | 2.96E-04    |
| A_23_P90453    | KRTDAP           | 5.0672073   | 3.13E-04    |
| A_21_P0007787  | LINC00944        | 5.048319    | 4.82E-04    |
| A_19_P00806473 |                  | 5.04339     | 1.91E-04    |
| A_23_P5703     | LYG2             | 5.0229416   | 0.012002256 |
| A_21_P0003300  | lnc-AMOTL2-2     | 5.0048904   | 0.008820575 |
| A_21_P0006492  | lnc-MAOA-2       | 4.9736543   | 6.90E-04    |
| A_21_P0001637  | lnc-HIST3H3-1    | 4.9209223   | 0.007281872 |
| A_33_P3302881  | KLHL31           | 4.8151574   | 7.81E-04    |
| A_33_P3420862  | PAGE2B           | 4.8146024   | 4.77E-04    |
| A_21_P0012411  | LOC101928430     | 4.811081    | 0.004236311 |
| A_33_P3299565  | LEKR1            | 4.8058176   | 0.00837151  |
| A_23_P94095    | ANKRD46          | 4.722621    | 7.45E-04    |

|                |                    |           |             |
|----------------|--------------------|-----------|-------------|
| A_32_P96036    | MEX3A              | 4.7181926 | 6.38E-04    |
| A_21_P0012576  |                    | 4.6871915 | 0.001019703 |
| A_21_P0013394  | LOC102723946       | 4.673946  | 0.008215879 |
| A_21_P0007788  | Inc-DHX37-10       | 4.6611977 | 0.027739251 |
| A_23_P91512    | CLDN14             | 4.601097  | 7.79E-04    |
| A_32_P189781   | LINC00520          | 4.58814   | 0.001398248 |
| A_33_P3270429  | NR1D2              | 4.587277  | 6.54E-04    |
| A_33_P3323486  |                    | 4.586427  | 0.005853048 |
| A_19_P00322435 | LOC644838          | 4.5736156 | 0.001272006 |
| A_23_P369994   | DCLK1              | 4.5489025 | 2.45E-04    |
| A_33_P3377649  | PRSS16             | 4.529053  | 5.12E-04    |
| A_21_P0013914  | FAM157B            | 4.5111084 | 4.30E-04    |
| A_24_P323941   | FAM209A            | 4.4165554 | 8.29E-04    |
| A_33_P3395028  | LOC152225          | 4.3949103 | 0.017892456 |
| A_19_P00323103 | UBE2E3             | 4.3897862 | 4.43E-04    |
| A_33_P3356361  | SRP14-AS1          | 4.3729396 | 0.001279297 |
| A_33_P3353372  | LMBR1              | 4.3612437 | 6.80E-04    |
| A_21_P0004632  |                    | 4.35733   | 0.001286041 |
| A_21_P0001751  | Inc-FAIM3-2        | 4.3486676 | 3.57E-04    |
| A_24_P169048   | RFPL3S             | 4.3404655 | 0.045360282 |
| A_23_P147786   | RIMS2              | 4.2759595 | 0.001067743 |
| A_21_P0002532  | Inc-AC073043.2.1-1 | 4.2752223 | 0.006018415 |
| A_33_P3365611  | BTF3L4             | 4.274502  | 2.75E-04    |
| A_21_P0007901  | Inc-DHX37-10       | 4.2243767 | 4.73E-04    |
| A_33_P3232692  | IL24               | 4.2168    | 8.06E-04    |
| A_33_P3252394  | GADD45G            | 4.2020006 | 9.48E-04    |
| A_33_P3363395  |                    | 4.1610584 | 0.020965409 |
| A_21_P0006017  |                    | 4.14463   | 2.91E-04    |
| A_33_P3419865  | Inc-C5orf42-2      | 4.1445093 | 0.032764215 |
| A_23_P436145   | LOC100507431       | 4.142546  | 0.002778542 |
| A_33_P3304182  |                    | 4.134065  | 0.002256789 |
| A_23_P28834    | PHACTR3            | 4.057036  | 5.29E-04    |
| A_24_P408736   | GALNT5             | 4.056339  | 3.77E-04    |
| A_23_P410717   | CIART              | 4.055518  | 0.017002743 |
| A_21_P0007481  | LINC00944          | 4.0211706 | 3.58E-04    |
| A_21_P0011408  | ULK4P3             | 4.0043764 | 5.61E-04    |
| A_21_P0007786  | LINC00944          | 4.000118  | 0.001227553 |
| A_21_P0004659  | LOC101928353       | 3.9821267 | 0.001541602 |
| A_33_P3417432  | LOC100129098       | 3.980983  | 0.001043249 |
| A_23_P145238   | HIST1H2BK          | 3.9737463 | 4.42E-04    |
| A_33_P3289371  | PHACTR3            | 3.9375677 | 6.36E-04    |
| A_21_P0003334  |                    | 3.928217  | 0.003159988 |
| A_33_P3286953  | ADAMTS6            | 3.9233549 | 7.68E-04    |
| A_23_P110941   | GSTA4              | 3.9146523 | 5.43E-04    |
| A_21_P0009752  | Inc-UQCRFS1-9      | 3.902469  | 7.40E-04    |
| A_33_P3274397  | CHM                | 3.8596618 | 8.70E-04    |
| A_21_P0002902  | LINC01324          | 3.8450317 | 0.003605008 |
| A_24_P497464   | SOX9-AS1           | 3.8307214 | 0.00244307  |
| A_21_P0013255  | XLOC_I2_013513     | 3.825695  | 0.010063507 |
| A_32_P147078   | SLC8A1             | 3.7951262 | 0.041457858 |
| A_24_P170234   | RNF148             | 3.7750814 | 0.001213835 |
| A_21_P0010481  | Inc-C22orf26-2     | 3.7496314 | 5.09E-04    |
| A_23_P99063    | LUM                | 3.744094  | 8.88E-04    |
| A_23_P80974    | TDO2               | 3.7335887 | 0.003051642 |
| A_33_P3222501  | FAM157A            | 3.7164967 | 0.002725111 |
| A_21_P0013374  | LOC101927769       | 3.7107816 | 0.014466391 |
| A_23_P123096   | GNGT1              | 3.7062588 | 0.007463801 |
| A_21_P0009753  | LINC00662          | 3.7050898 | 5.24E-04    |
| A_24_P62530    | RHOJ               | 3.6939669 | 0.002814427 |
| A_23_P69179    | P3H2               | 3.6793017 | 4.26E-04    |
| A_19_P00321264 | UBA6-AS1           | 3.6738358 | 0.001838024 |
| A_21_P0005116  | LOC101928353       | 3.6737769 | 4.01E-04    |
| A_24_P940115   | DLC1               | 3.6717358 | 4.43E-04    |



|                |                |           |             |
|----------------|----------------|-----------|-------------|
| A_23_P75310    | ARHGAP22       | 3.6519787 | 5.30E-04    |
| A_23_P52121    | PDZK1          | 3.6505034 | 0.00463139  |
| A_23_P168761   | PTPRZ1         | 3.6368647 | 7.26E-04    |
| A_19_P00318725 | LINC01204      | 3.6276655 | 7.01E-04    |
| A_21_P0002960  |                | 3.611924  | 6.78E-04    |
| A_21_P0003826  | Inc-S100P-1    | 3.6097775 | 4.40E-04    |
| A_23_P59637    | DOCK4          | 3.6053858 | 0.030818194 |
| A_19_P00320722 | SRP14-AS1      | 3.5868049 | 0.005420819 |
| A_32_P191840   | LOC644662      | 3.5850313 | 0.016332755 |
| A_23_P120694   | KCNE2          | 3.573025  | 5.61E-04    |
| A_33_P3243093  | RGS5           | 3.5729065 | 0.001177943 |
| A_33_P3221303  | CCR10          | 3.5570066 | 0.001973106 |
| A_23_P109488   | PIK3IP1        | 3.5479622 | 0.00374992  |
| A_21_P0004245  | LOC100506639   | 3.5230038 | 0.026993653 |
| A_23_P151059   | FAM90A1        | 3.5079772 | 0.039489273 |
| A_24_P157926   | TNFAIP3        | 3.4980133 | 0.001494507 |
| A_33_P3213119  | HAS2-AS1       | 3.4860015 | 0.001022771 |
| A_33_P3429576  | AP3S1          | 3.4739711 | 0.001368278 |
| A_33_P3288684  |                | 3.4723284 | 0.017405013 |
| A_33_P3420224  | ENTPD8         | 3.4638793 | 5.88E-04    |
| A_19_P00322310 | LINC01094      | 3.4562235 | 0.002068624 |
| A_33_P3514487  | VSTM1          | 3.450445  | 0.001918043 |
| A_21_P0000022  | BRI3           | 3.4432986 | 0.001006858 |
| A_21_P0000918  |                | 3.4422824 | 0.012858324 |
| A_33_P3345743  | PFN1P2         | 3.4337225 | 5.07E-04    |
| A_33_P3320538  | NUPL1          | 3.4310696 | 0.001399566 |
| A_33_P3371402  | FAM223A        | 3.4262655 | 0.011560242 |
| A_33_P3299025  | LOC389834      | 3.414938  | 0.03870201  |
| A_21_P0009764  |                | 3.4144735 | 0.008931828 |
| A_33_P3265159  | GAPVD1         | 3.4017212 | 0.016764311 |
| A_19_P00321263 | UBA6-AS1       | 3.3928478 | 0.009099657 |
| A_23_P59388    | DST            | 3.3915248 | 0.006950107 |
| A_23_P127406   | KDM4D          | 3.389265  | 0.025236534 |
| A_24_P391991   | FAM183B        | 3.3874083 | 0.005079582 |
| A_23_P371266   | DNM3           | 3.3799717 | 0.001285484 |
| A_21_P0009754  | Inc-UQCRFS1-9  | 3.371646  | 0.001615069 |
| A_19_P00315583 | LOC100130691   | 3.3657453 | 0.002179279 |
| A_33_P3265872  | LOC101927497   | 3.3646948 | 0.001994368 |
| A_33_P3347147  | SUPT3H         | 3.3617873 | 0.001455768 |
| A_33_P3705884  | LINC00662      | 3.3544414 | 5.36E-04    |
| A_19_P00320927 | LINC00942      | 3.348329  | 5.79E-04    |
| A_33_P3337272  | NRARP          | 3.3465743 | 5.30E-04    |
| A_33_P3305536  | METT15         | 3.3422182 | 0.005276517 |
| A_33_P3307073  |                | 3.335659  | 0.004710593 |
| A_33_P3231814  |                | 3.3316834 | 9.61E-04    |
| A_33_P3305203  | RPS6KA5        | 3.326761  | 0.01921628  |
| A_21_P0006803  | Inc-EBF3-3     | 3.3198304 | 0.016748589 |
| A_21_P0004293  | Inc-ADAMTS19-2 | 3.3179488 | 0.016988438 |
| A_23_P148473   | IL2RG          | 3.313543  | 0.001602713 |
| A_23_P78782    | CA11           | 3.3024018 | 0.002909644 |
| A_33_P3271455  | PXDN           | 3.2929337 | 0.004739542 |
| A_21_P0000539  | LINC01138      | 3.289094  | 0.001373051 |
| A_19_P00319822 |                | 3.2694545 | 7.96E-04    |
| A_33_P3229239  | HIST2H2BF      | 3.2689893 | 0.008574538 |
| A_21_P0009125  | Inc-IRX3-2     | 3.2664707 | 0.001701899 |
| A_21_P0014889  | LOC100507431   | 3.2635763 | 9.52E-04    |
| A_23_P376591   | CLYBL          | 3.2402134 | 0.001045388 |
| A_24_P759477   | ITGB8          | 3.2275734 | 0.001425042 |
| A_21_P0000547  | TNIK           | 3.2185404 | 0.001097098 |
| A_32_P150735   |                | 3.2170532 | 6.01E-04    |
| A_21_P0000127  | SSC5D          | 3.2128315 | 0.013093448 |
| A_23_P305616   | LOC652276      | 3.1814966 | 0.019136237 |
| A_19_P00812924 | LOC100507165   | 3.1811466 | 0.0055029   |

|                |              |           |             |
|----------------|--------------|-----------|-------------|
| A_33_P3309110  | ALOX12-AS1   | 3.1803522 | 0.002418099 |
| A_21_P0005526  | Inc-WASL-1   | 3.180092  | 7.90E-04    |
| A_33_P3259943  | PLBD1-AS1    | 3.175178  | 7.28E-04    |
| A_23_P56746    | FAP          | 3.1672242 | 0.039068494 |
| A_24_P303145   | ANKH         | 3.1632257 | 5.95E-04    |
| A_21_P0006886  | LOC102723652 | 3.1616437 | 9.80E-04    |
| A_24_P515319   | FAM90A7P     | 3.1424313 | 0.001047655 |
| A_24_P128442   | TBX15        | 3.1396346 | 0.017622365 |
| A_32_P379379   | ATG9B        | 3.139344  | 0.013111765 |
| A_21_P0011630  | FLJ43681     | 3.1288145 | 0.032515876 |
| A_33_P3324186  | LOC642366    | 3.1269324 | 0.001448174 |
| A_33_P3556532  | DNAH17       | 3.122635  | 0.008657705 |
| A_23_P160318   | COL16A1      | 3.1183164 | 6.59E-04    |
| A_19_P00326822 | UBE2E3       | 3.1141846 | 7.60E-04    |
| A_21_P0003574  | Inc-DRD5-10  | 3.113276  | 8.64E-04    |
| A_23_P88404    | TGFB3        | 3.0744445 | 0.001605017 |
| A_33_P3263232  | LRRRC3       | 3.0633469 | 0.025145821 |
| A_19_P00319900 |              | 3.058844  | 0.014349395 |
| A_21_P0005840  | LINC01301    | 3.055715  | 0.006169656 |
| A_24_P880043   | PCGF5        | 3.0478415 | 6.97E-04    |
| A_21_P0001018  | LOC100996741 | 3.0421014 | 0.005639477 |
| A_23_P143535   | WDR4         | 3.0406473 | 7.31E-04    |
| A_24_P769672   | C12orf73     | 3.0373461 | 7.44E-04    |
| A_21_P0001545  | LOC149351    | 3.0284986 | 0.001244828 |
| A_23_P48029    | CLEC4A       | 3.0267735 | 8.89E-04    |
| A_33_P3429575  | LOC643454    | 3.0256717 | 9.03E-04    |
| A_23_P64121    | KIAA1549L    | 3.0113368 | 0.028813465 |
| A_24_P166663   | CDK6         | 3.0056684 | 9.93E-04    |
| A_23_P259344   | CECR6        | 3.0021224 | 0.002465607 |
| A_24_P363100   | RGMB         | 2.9944665 | 0.002715037 |
| A_33_P3415086  |              | 2.9913728 | 0.001191607 |
| A_24_P941268   | CA5B         | 2.9872003 | 8.45E-04    |
| A_23_P131846   | SNAI1        | 2.985292  | 8.11E-04    |
| A_23_P250800   | ST3GAL6      | 2.9813533 | 0.001034369 |
| A_24_P105564   | PRKAB2       | 2.977278  | 7.96E-04    |
| A_23_P148541   | CTAG1A       | 2.9754665 | 7.58E-04    |
| A_23_P417974   | AQP11        | 2.974294  | 0.001747022 |
| A_33_P3239122  | PPIH         | 2.9731803 | 0.003227285 |
| A_24_P261052   | MTMR9        | 2.9636884 | 0.001553343 |
| A_33_P3238171  | ZDHC8        | 2.960811  | 0.002294787 |
| A_23_P341567   | SLC9B2       | 2.9604886 | 0.001955647 |
| A_24_P942969   | FUT2         | 2.9553094 | 9.51E-04    |
| A_33_P3315021  | RPL23AP7     | 2.9524615 | 0.001458923 |
| A_23_P150343   | SLN          | 2.947428  | 0.004558841 |
| A_19_P00323040 | LINC01322    | 2.9426181 | 0.015393163 |
| A_21_P0010480  | Inc-SMC1B-3  | 2.920268  | 8.40E-04    |
| A_33_P3369461  | AMIGO1       | 2.914447  | 0.004230631 |
| A_19_P00319376 | UBA6-AS1     | 2.9114428 | 0.004488969 |
| A_23_P13740    | NAV3         | 2.910128  | 0.001212391 |
| A_33_P3257252  | ZNF551       | 2.9033217 | 0.018231181 |
| A_19_P00322409 | STXBP5-AS1   | 2.893406  | 0.011757487 |
| A_21_P0006728  | LINC00704    | 2.8903358 | 0.001429456 |
| A_24_P944427   | SETD5        | 2.8888078 | 0.002762158 |
| A_19_P00322611 | Inc-SPAG1-3  | 2.8833904 | 0.013465672 |
| A_19_P00317054 | SATB1-AS1    | 2.882177  | 0.001065415 |
| A_23_P381505   | VWDE         | 2.8808122 | 0.00982206  |
| A_21_P0000630  | LOC643733    | 2.8770165 | 0.049467713 |
| A_23_P46045    | RGS5         | 2.8703287 | 0.015432062 |
| A_21_P0014631  | LOC101929787 | 2.8640647 | 0.003112219 |
| A_21_P0014637  | LOC101927765 | 2.8619282 | 0.036154553 |
| A_21_P0001551  | LOC102723542 | 2.8612995 | 0.011285767 |
| A_21_P0004986  | Inc-GMDS-4   | 2.860543  | 0.003112144 |
| A_33_P3318322  | STEAP4       | 2.8577094 | 0.003464489 |

|                |                |           |             |
|----------------|----------------|-----------|-------------|
| A_33_P3839897  | RNU4ATAC       | 2.8562343 | 0.005437078 |
| A_19_P00315633 | LOC101927668   | 2.8539927 | 8.50E-04    |
| A_23_P32805    | GRID1          | 2.850312  | 0.034114413 |
| A_21_P0010629  | XLOC_I2_000961 | 2.8458257 | 0.004489372 |
| A_23_P69958    | AP3S1          | 2.8438957 | 0.001136014 |
| A_33_P3219840  | ZNRD1-AS1      | 2.8225045 | 0.007553819 |
| A_33_P3523501  | LOC374890      | 2.818489  | 0.001523453 |
| A_32_P71571    | FAM19A4        | 2.809707  | 0.010277399 |
| A_21_P0012368  | XLOC_I2_009639 | 2.8094635 | 0.00301937  |
| A_24_P149124   | NREP           | 2.807413  | 0.003262563 |
| A_21_P0013071  | XLOC_I2_012925 | 2.8034134 | 0.033590067 |
| A_21_P0003575  |                | 2.7974808 | 0.002766335 |
| A_33_P3383724  | TRIM61         | 2.7945228 | 0.0033548   |
| A_33_P3288074  | Inc-ATG2B-2    | 2.793859  | 0.002361266 |
| A_33_P3238166  | PXDN           | 2.792264  | 9.90E-04    |
| A_23_P99540    | ZFP36L1        | 2.7902744 | 0.001158211 |
| A_21_P0007319  | Inc-GALNTL4-1  | 2.7812984 | 0.001178472 |
| A_19_P00318314 | LOC101927151   | 2.7792757 | 0.030106539 |
| A_33_P3316539  | SLC7A2         | 2.7757952 | 9.26E-04    |
| A_21_P0010562  | XLOC_I2_000427 | 2.77376   | 0.045379907 |
| A_19_P00316911 |                | 2.7653217 | 0.002676914 |
| A_24_P40529    | TMLHE          | 2.7568843 | 0.02178784  |
| A_23_P120103   | KCNS3          | 2.7467008 | 9.55E-04    |
| A_23_P431179   | HIST1H4A       | 2.7409277 | 0.001522938 |
| A_33_P3210468  | MATN4          | 2.7401123 | 0.003268605 |
| A_24_P570049   | PPARA          | 2.7361557 | 0.001693762 |
| A_19_P00322339 | LINC00707      | 2.7359962 | 0.015547684 |
| A_33_P3256113  | GUSBP1         | 2.7235708 | 0.03265913  |
| A_21_P0011129  | TPTE2P6        | 2.7231605 | 0.013152546 |
| A_24_P350683   | SLC9A1         | 2.7208524 | 0.018551812 |
| A_23_P365248   | KCNG4          | 2.7183137 | 0.011095022 |
| A_23_P433855   | RGS4           | 2.7126982 | 0.013389442 |
| A_32_P195401   | FAM117B        | 2.7106895 | 0.00102101  |
| A_21_P0012781  |                | 2.709578  | 0.001525392 |
| A_23_P397937   | SAMD3          | 2.7088192 | 0.001026994 |
| A_23_P340131   | PRSS16         | 2.7081034 | 0.002161157 |
| A_33_P3368323  |                | 2.7071414 | 0.006813012 |
| A_23_P213014   | SLC2A9         | 2.7038202 | 0.002319971 |
| A_21_P0013312  | XLOC_I2_013853 | 2.7034655 | 0.023370747 |
| A_21_P0004504  | LOC101928505   | 2.7025936 | 0.033265244 |
| A_19_P00322576 |                | 2.6962063 | 0.027612394 |
| A_23_P36882    | NTS            | 2.6947265 | 0.01752146  |
| A_32_P129419   | ICE2           | 2.691144  | 0.011348358 |
| A_33_P3418394  | ATG12          | 2.6910927 | 0.001987401 |
| A_33_P3417865  | ZFP36L1        | 2.6901257 | 0.001125528 |
| A_21_P0010776  | PARP8          | 2.6769934 | 0.00147776  |
| A_21_P0012776  | XLOC_I2_011118 | 2.671715  | 0.001750796 |
| A_33_P3380642  | FRAS1          | 2.6622856 | 0.014307763 |
| A_21_P0004517  | TMEM161B-AS1   | 2.6599905 | 0.023995122 |
| A_33_P3307980  | Inc-FAM133B-1  | 2.6571975 | 0.044708353 |
| A_19_P00320846 | UBA6-AS1       | 2.6562202 | 0.006388252 |
| A_33_P3389113  | TRAF3IP2-AS1   | 2.6549346 | 0.00673057  |
| A_33_P3326617  | FAHD1          | 2.6535285 | 0.001274888 |
| A_33_P3286254  | AP3S1          | 2.6507707 | 0.001107561 |
| A_21_P0008871  | FLJ42627       | 2.6458707 | 0.008923164 |
| A_33_P3222009  | ARL14EPL       | 2.640448  | 0.001515321 |
| A_33_P3607359  | LOC399815      | 2.6366057 | 0.001226995 |
| A_19_P00321549 | SATB1-AS1      | 2.6299045 | 0.001514552 |
| A_33_P3308167  | POLR2J4        | 2.627766  | 0.008769497 |
| A_33_P3389298  | ZNF30          | 2.6277454 | 0.001740414 |
| A_23_P422212   | SLC35F3        | 2.6271155 | 0.001219878 |
| A_32_P66364    | PPP1R1C        | 2.619359  | 0.00145404  |
| A_33_P3222341  | PITPNC1        | 2.6192875 | 0.002231015 |

|                |                      |           |             |
|----------------|----------------------|-----------|-------------|
| A_23_P354827   | ZNF550               | 2.6175592 | 0.001339138 |
| A_33_P3324814  | SATB1-AS1            | 2.6148732 | 0.001263156 |
| A_32_P102935   | SPDYA                | 2.6134884 | 0.001553549 |
| A_23_P70359    | AGPAT4-IT1           | 2.6128976 | 0.008681143 |
| A_32_P34003    | FIGN                 | 2.6122806 | 0.004110557 |
| A_21_P0004273  | Inc-XRCC4-1          | 2.6119955 | 0.001118232 |
| A_19_P00315780 | LOC101929709         | 2.6088047 | 0.006808994 |
| A_33_P3237804  | Inc-RP11-351M8.1.1-1 | 2.603564  | 0.03101354  |
| A_23_P78018    | ABCA5                | 2.5999029 | 0.002122651 |
| A_24_P63019    | IL1R2                | 2.5985148 | 0.001451294 |
| A_24_P212811   | ANKRD34A             | 2.5977402 | 0.003551572 |
| A_32_P75661    | PDIA6                | 2.5970893 | 0.030801728 |
| A_21_P0000538  | LINC01138            | 2.5955942 | 0.002356069 |
| A_23_P169978   | ZNF608               | 2.593349  | 0.009831995 |
| A_23_P250516   | LOC101928710         | 2.5894048 | 0.023787435 |
| A_19_P00320723 | SRP14-AS1            | 2.5888712 | 0.001554329 |
| A_23_P71530    | TNFRSF11B            | 2.5829442 | 0.001518038 |
| A_21_P0012674  |                      | 2.5828488 | 0.001172963 |
| A_23_P204436   | GIT2                 | 2.5763035 | 0.002173518 |
| A_33_P3290394  | IL2RG                | 2.575781  | 0.002060642 |
| A_33_P3234521  | DIS3L                | 2.575188  | 0.001574812 |
| A_24_P400172   | LOC100130691         | 2.5733612 | 0.016552273 |
| A_23_P415015   | ATL2                 | 2.5727615 | 0.005584965 |
| A_33_P3318763  | LOC101927497         | 2.5724723 | 0.001739405 |
| A_33_P3224795  | IKZF5                | 2.5682411 | 0.003041969 |
| A_21_P0013256  |                      | 2.5665011 | 0.001192393 |
| A_24_P260134   | NMNAT3               | 2.5657794 | 0.001729764 |
| A_23_P157268   | CLDN12               | 2.564329  | 0.001302928 |
| A_21_P0014380  |                      | 2.5604572 | 0.006607769 |
| A_19_P00319030 | LOC100506136         | 2.5515306 | 0.00270756  |
| A_24_P350576   | TNIK                 | 2.5511136 | 0.002528457 |
| A_21_P0010449  | LOC100506737         | 2.5493844 | 0.001230474 |
| A_21_P0007089  | PPP2R2D              | 2.547963  | 0.001506273 |
| A_33_P3216994  | HERC4                | 2.5441878 | 0.003958169 |
| A_23_P300056   | CDC42                | 2.543693  | 0.025842903 |
| A_33_P3378435  |                      | 2.5409591 | 0.017853532 |
| A_21_P0011970  |                      | 2.5398378 | 0.02222668  |
| A_33_P3228271  | CST3                 | 2.536879  | 0.001435159 |
| A_19_P00803685 | ANKRD33B             | 2.535718  | 0.04705027  |
| A_33_P3228642  |                      | 2.5336099 | 0.004951548 |
| A_24_P4816     | GABARAPL1            | 2.532399  | 0.004902566 |
| A_23_P374322   | LACC1                | 2.528722  | 0.049870025 |
| A_23_P255331   | MGARP                | 2.5202038 | 0.04850564  |
| A_19_P00322407 | STXBP5-AS1           | 2.5190625 | 0.008924692 |
| A_21_P0011107  | ZNF891               | 2.5150447 | 0.004300484 |
| A_21_P0007678  | Inc-EFCAB4B-3        | 2.5132656 | 0.003570027 |
| A_19_P00315738 | LOC101929709         | 2.512431  | 0.002071664 |
| A_19_P00320579 | LINC-PINT            | 2.5123234 | 0.001294077 |
| A_19_P00318297 | APTR                 | 2.5115678 | 0.001692646 |
| A_19_P00809382 | SETD1B               | 2.509019  | 0.04026119  |
| A_33_P3253747  | CYP1A2               | 2.507326  | 0.001895062 |
| A_33_P3565787  | PSMG3-AS1            | 2.5063162 | 0.001948796 |
| A_21_P0012507  | AADACP1              | 2.5055194 | 0.004702823 |
| A_33_P3406245  | TAF1A                | 2.5031466 | 0.003751065 |
| A_23_P324327   | GPRC5B               | 2.4995434 | 0.002587324 |
| A_33_P3238402  |                      | 2.4980164 | 0.005017712 |
| A_33_P3260654  |                      | 2.4974468 | 0.007983109 |
| A_33_P3323842  | BDNF-AS              | 2.496827  | 0.001807853 |
| A_33_P3416009  | DONSON               | 2.495795  | 0.034551613 |
| A_21_P0013398  |                      | 2.4912422 | 0.002387557 |
| A_33_P3304107  | KLHL28               | 2.490972  | 0.001345393 |
| A_23_P70328    | CENPQ                | 2.4886613 | 0.001802289 |
| A_23_P412186   | ZNF252P              | 2.4850135 | 0.002184166 |

|                |                |           |             |
|----------------|----------------|-----------|-------------|
| A_33_P3233135  | KIF16B         | 2.4771914 | 0.002017307 |
| A_33_P3401990  | VPREB3         | 2.4758878 | 0.002537323 |
| A_23_P123086   | PSMG3-AS1      | 2.4678571 | 0.002943153 |
| A_32_P154053   | ATG9B          | 2.4671538 | 0.002228641 |
| A_21_P0010452  | LINC00899      | 2.4671361 | 0.024573898 |
| A_21_P0013285  | LOC101927668   | 2.4663045 | 0.002414021 |
| A_23_P76622    | DCT            | 2.461157  | 0.003215252 |
| A_33_P3304893  |                | 2.4601278 | 0.001429777 |
| A_23_P404162   | HDAC9          | 2.457268  | 0.009910041 |
| A_23_P5654     | IL37           | 2.4542296 | 0.003754881 |
| A_33_P3230259  | NCAPH          | 2.4494815 | 0.003159443 |
| A_21_P0006040  | Inc-ACTL7A-1   | 2.44887   | 0.007470671 |
| A_32_P116556   | ZNF469         | 2.4486208 | 0.021393098 |
| A_21_P0008620  | SRP14-AS1      | 2.4467127 | 0.006429358 |
| A_33_P3410019  |                | 2.4446979 | 0.002327364 |
| A_23_P69030    | COL8A1         | 2.439361  | 0.001684572 |
| A_33_P3368695  | HES7           | 2.4385293 | 0.002016971 |
| A_23_P24176    | CCNJ           | 2.4371738 | 0.014626814 |
| A_23_P165668   | SLC35F5        | 2.4348128 | 0.015905162 |
| A_33_P3309201  | C16orf95       | 2.4333398 | 0.008762213 |
| A_23_P211110   | SIM2           | 2.4314187 | 0.005647917 |
| A_23_P27332    | TCF4           | 2.4308462 | 0.001512453 |
| A_23_P20392    | PSD3           | 2.430581  | 0.00372097  |
| A_21_P0014898  |                | 2.4245706 | 0.00913789  |
| A_21_P0011383  | UBE2Q2P2       | 2.4240825 | 0.0378375   |
| A_21_P0010632  | XL0C_I2_001011 | 2.4227555 | 0.004834114 |
| A_33_P3367062  | SWT1           | 2.420886  | 0.004920072 |
| A_21_P0001608  |                | 2.418006  | 0.031128284 |
| A_21_P0012175  | XL0C_I2_009050 | 2.4153512 | 0.00747144  |
| A_32_P92505    | LCLAT1         | 2.4150858 | 0.00230578  |
| A_33_P3531204  | C1QTNF9B-AS1   | 2.4147427 | 0.001617375 |
| A_21_P0005905  | Inc-FAM84B-8   | 2.4105282 | 0.002027901 |
| A_21_P0006566  | Inc-RAB40AL-1  | 2.4097679 | 0.027454488 |
| A_33_P3385351  |                | 2.4095314 | 0.002478241 |
| A_21_P0007726  |                | 2.4074743 | 0.005289653 |
| A_23_P80570    | AADAC          | 2.4062743 | 0.002777215 |
| A_33_P3300916  | AADACP1        | 2.4050713 | 0.002758748 |
| A_23_P259863   | CD177          | 2.3996387 | 0.005659602 |
| A_19_P00317897 | LOC101928673   | 2.3987453 | 0.007409591 |
| A_23_P38677    | SLMO1          | 2.397812  | 0.001819726 |
| A_23_P167997   | HIST1H2BG      | 2.3973737 | 0.001966074 |
| A_21_P0000852  | LOC100507412   | 2.3923647 | 0.007970128 |
| A_24_P3783     | HIST1H2BM      | 2.3918223 | 0.002799372 |
| A_32_P440768   | ALOX12P2       | 2.390839  | 0.023264715 |
| A_23_P200801   | PDE4DIP        | 2.3890243 | 0.002967515 |
| A_24_P67898    | MGEA5          | 2.3884854 | 0.003297345 |
| A_33_P3416881  | C2orf27A       | 2.387648  | 0.001564691 |
| A_33_P3261505  | EPG5           | 2.3863578 | 0.009460707 |
| A_24_P260440   | TNPO1          | 2.3861752 | 0.001566211 |
| A_24_P935782   | ZNF121         | 2.3807628 | 0.003972531 |
| A_21_P0013584  | LOC102725126   | 2.3795245 | 0.011212465 |
| A_33_P3401673  | GIT1           | 2.3779008 | 0.030824654 |
| A_33_P3248265  | LTB            | 2.3775733 | 0.003714285 |
| A_21_P0011337  | XL0C_I2_004771 | 2.3764973 | 0.04821082  |
| A_21_P0011452  | ERVK13-1       | 2.374452  | 0.036924686 |
| A_21_P0004718  | NQO2           | 2.3737583 | 0.00215943  |
| A_23_P315364   | CXCL2          | 2.371659  | 0.001726781 |
| A_32_P78783    | ZNF778         | 2.3703194 | 0.00429383  |
| A_24_P359441   | CRYBB3         | 2.3691926 | 0.005312924 |
| A_33_P3213892  | PRDM15         | 2.3687756 | 0.001638241 |
| A_21_P0005906  |                | 2.3685536 | 0.001977465 |
| A_33_P3306078  | MYH16          | 2.3664064 | 0.001626954 |
| A_33_P3421520  | IKZF5          | 2.3582761 | 0.002249517 |

|                |                |           |             |
|----------------|----------------|-----------|-------------|
| A_23_P29723    | SGOL1          | 2.3579254 | 0.005489147 |
| A_23_P129128   | TARSL2         | 2.3577664 | 0.005011081 |
| A_33_P3361891  | TMPRSS7        | 2.357576  | 0.01517892  |
| A_33_P3250438  | SMIM7          | 2.3558483 | 0.001915338 |
| A_21_P0010453  | lnc-C22orf26-2 | 2.355314  | 0.002367397 |
| A_33_P3337540  | IFNAR2         | 2.3552032 | 0.001669635 |
| A_24_P104091   | ORAOV1         | 2.352327  | 0.002643981 |
| A_23_P68234    | GPR75          | 2.35169   | 0.038696647 |
| A_23_P35293    | GJB5           | 2.34913   | 0.004063716 |
| A_23_P122852   | SMARCD3        | 2.3464024 | 0.002661298 |
| A_24_P29686    | ZMIZ2          | 2.3456354 | 0.001691844 |
| A_33_P3299872  | HINT3          | 2.344713  | 0.002099977 |
| A_33_P3340565  | PRSS53         | 2.3444543 | 0.002277977 |
| A_33_P3280009  |                | 2.337826  | 0.002235972 |
| A_23_P36724    | FBXL14         | 2.3369293 | 0.001867188 |
| A_24_P262127   | RRAD           | 2.3299732 | 0.003132288 |
| A_23_P143143   | ID2            | 2.3270762 | 0.001763214 |
| A_23_P218358   | CDRT1          | 2.3252914 | 0.002309005 |
| A_19_P00316257 | LOC101927668   | 2.3247335 | 0.005562091 |
| A_33_P3286536  | FUT4           | 2.3236024 | 0.002127378 |
| A_23_P136460   | FAM13B         | 2.3216493 | 0.003324201 |
| A_21_P0005217  | lnc-IL6-3      | 2.3206263 | 0.004196873 |
| A_32_P112592   | LINC01140      | 2.3191018 | 0.010451207 |
| A_24_P68908    | LOC344887      | 2.3023784 | 0.009341903 |
| A_21_P0013751  | XLOC_I2_015441 | 2.3017588 | 0.007238659 |
| A_24_P917819   | ANKRD30BP2     | 2.3010936 | 0.021651514 |
| A_23_P73721    | RRAGB          | 2.3005784 | 0.009649792 |
| A_24_P217234   | SLC3A1         | 2.300437  | 0.006030453 |
| A_33_P3413732  |                | 2.299795  | 0.002287183 |
| A_21_P0005359  | LOC100506178   | 2.2980232 | 0.002723132 |
| A_33_P3324810  |                | 2.2961028 | 0.007041038 |
| A_23_P89589    | PER1           | 2.295258  | 0.004561504 |
| A_23_P427760   | PIWIL4         | 2.2861173 | 0.003230176 |
| A_33_P3245449  | LOC389834      | 2.2857008 | 0.002193591 |
| A_21_P0009302  | CDRT1          | 2.2845817 | 0.003536081 |
| A_23_P25674    | CKB            | 2.2801208 | 0.037757006 |
| A_21_P0000694  | NIFK-AS1       | 2.2798007 | 0.003210245 |
| A_21_P0013592  | XLOC_I2_014850 | 2.2762704 | 0.003538018 |
| A_33_P3265394  | WDR74          | 2.274138  | 0.047125746 |
| A_33_P3271121  |                | 2.2737777 | 0.005791928 |
| A_21_P0008570  | lnc-USP8-2     | 2.2716835 | 0.026498398 |
| A_21_P0008354  | lnc-TTC9-1     | 2.2712495 | 0.005793555 |
| A_21_P0013834  | CT45A7         | 2.270229  | 0.003299207 |
| A_23_P3552     | LOC102723428   | 2.2684414 | 0.003387616 |
| A_23_P5568     | SFT2D3         | 2.2651448 | 0.008529184 |
| A_21_P0003078  | LINCR-0002     | 2.2633529 | 0.007340451 |
| A_32_P58937    | MBTD1          | 2.2607667 | 0.002881245 |
| A_23_P364544   | C12orf60       | 2.26      | 0.003283521 |
| A_24_P46953    | SGK3           | 2.2575624 | 0.002453872 |
| A_33_P3362148  | TTC28-AS1      | 2.2540958 | 0.003544195 |
| A_33_P3212754  | NUTM2F         | 2.2535176 | 0.007213751 |
| A_32_P69368    | ID2            | 2.2522879 | 0.002843535 |
| A_19_P00322663 |                | 2.250177  | 0.00293623  |
| A_33_P3301469  | ANKRD30BL      | 2.2479463 | 0.007186989 |
| A_33_P3233005  | MBTD1          | 2.2469516 | 0.008108617 |
| A_21_P0014024  | SATB1-AS1      | 2.244721  | 0.002135315 |
| A_21_P0009158  |                | 2.244259  | 0.008256999 |
| A_33_P3816688  | PPARGC1B       | 2.2438564 | 0.007667218 |
| A_23_P254254   | SGSH           | 2.2399592 | 0.008495493 |
| A_23_P7896     | DUSP22         | 2.2384858 | 0.034433443 |
| A_21_P0005949  | PVT1           | 2.2368863 | 0.002001829 |
| A_32_P36143    |                | 2.2331216 | 0.025951719 |
| A_23_P383132   | HIC2           | 2.2326875 | 0.00262329  |

|                |                    |           |             |
|----------------|--------------------|-----------|-------------|
| A_33_P3323718  | UACA               | 2.2320316 | 0.005636556 |
| A_23_P211106   | SETD4              | 2.2306995 | 0.002094202 |
| A_33_P3244593  |                    | 2.2300863 | 0.009961015 |
| A_19_P00800264 | OTUD6B-AS1         | 2.2296896 | 0.002463095 |
| A_33_P3324505  |                    | 2.2296178 | 0.006100114 |
| A_23_P22625    | SLC9A6             | 2.2266269 | 0.002419117 |
| A_33_P3326432  | SEPW1              | 2.2258196 | 0.00241284  |
| A_33_P3358626  | TAF4B              | 2.2241576 | 0.002041136 |
| A_33_P3339650  | DST                | 2.2236373 | 0.005325315 |
| A_23_P65240    | COL4A1             | 2.2231872 | 0.04728554  |
| A_33_P3228862  | LRRRC69            | 2.2229438 | 0.006010123 |
| A_33_P3357530  | SLC12A7            | 2.2226548 | 0.006205211 |
| A_33_P3228322  | IL18BP             | 2.222408  | 0.005423965 |
| A_23_P214079   | SPINK1             | 2.2221909 | 0.002092294 |
| A_23_P56553    | METTL8             | 2.2204769 | 0.002392452 |
| A_23_P209232   | CLIP4              | 2.2190514 | 0.005424322 |
| A_21_P0014059  | PIGC               | 2.2168844 | 0.002163301 |
| A_24_P50801    | NRP2               | 2.2165952 | 0.002338414 |
| A_21_P0000594  | BOK-AS1            | 2.211335  | 0.012829431 |
| A_23_P388871   | HIST4H4            | 2.2095819 | 0.020164156 |
| A_32_P12104    | ANAPC1             | 2.2084687 | 0.002911539 |
| A_32_P129950   | NHLRC3             | 2.2078154 | 0.005691978 |
| A_19_P00317034 |                    | 2.206521  | 0.002843287 |
| A_21_P0010743  |                    | 2.2042425 | 0.007602035 |
| A_33_P3299254  | VPREB3             | 2.200639  | 0.003300576 |
| A_24_P173124   | FLCN               | 2.2005746 | 0.002638824 |
| A_32_P220750   | PLGLB1             | 2.1997504 | 0.017658923 |
| A_33_P3384617  | XLOC_I2_003882     | 2.1936352 | 0.005960056 |
| A_33_P3245454  | LOC389834          | 2.1935313 | 0.013315892 |
| A_23_P90172    | PPP1R15A           | 2.192144  | 0.00326618  |
| A_33_P3227556  |                    | 2.1920774 | 0.003463425 |
| A_33_P3343828  | Inc-CEMP1-1        | 2.191899  | 0.002876706 |
| A_23_P342053   | RBBP6              | 2.190769  | 0.002737267 |
| A_33_P3394395  | FAM73A             | 2.1905875 | 0.015472497 |
| A_33_P3367196  | CNTNAP2            | 2.1876981 | 0.014369179 |
| A_24_P310256   | LGI4               | 2.1867824 | 0.011278221 |
| A_23_P254081   | LIAS               | 2.1856155 | 0.002988442 |
| A_23_P155666   | NAAA               | 2.1842127 | 0.002301487 |
| A_23_P138680   | IL15RA             | 2.183917  | 0.002483761 |
| A_33_P3399634  | RASSF10            | 2.183147  | 0.003064422 |
| A_21_P0003091  | Inc-AC069257.9.1-5 | 2.182511  | 0.006393911 |
| A_24_P89891    | TRAF1              | 2.1816058 | 0.004179164 |
| A_33_P3404759  |                    | 2.1800194 | 0.006936099 |
| A_33_P3289426  | ZNF775             | 2.1786711 | 0.005202974 |
| A_33_P3339336  | FAM86FP            | 2.1773133 | 0.00271895  |
| A_33_P3396214  | KREMEN2            | 2.1766543 | 0.003628258 |
| A_23_P33196    | COL5A2             | 2.1763983 | 0.002945133 |
| A_24_P106910   | PTCH1              | 2.1758127 | 0.044578467 |
| A_21_P0002741  | Inc-PPM1M-2        | 2.1734333 | 0.047276422 |
| A_23_P44569    | ABCC2              | 2.1721556 | 0.019719552 |
| A_23_P401106   | PDE2A              | 2.1707726 | 0.004677835 |
| A_19_P00813076 | LOC101927151       | 2.1705244 | 0.019483192 |
| A_21_P0010654  | HIST2H2BF          | 2.1690872 | 0.00290995  |
| A_33_P3249936  | C3orf67            | 2.1686056 | 0.00713536  |
| A_23_P345928   | METTL25            | 2.1685228 | 0.00558398  |
| A_21_P0001374  | NBPF15             | 2.16781   | 0.002622569 |
| A_33_P3389558  |                    | 2.1676857 | 0.004346075 |
| A_24_P886040   | DCP2               | 2.1676314 | 0.002514187 |
| A_33_P3255229  | SETD7              | 2.1671145 | 0.004599251 |
| A_21_P0014660  |                    | 2.1666422 | 0.004188849 |
| A_21_P0002823  | LINCR-0002         | 2.1666245 | 0.003415718 |
| A_23_P312358   | BEND7              | 2.1644588 | 0.010431623 |
| A_23_P59714    | MGC16142           | 2.1644511 | 0.037065644 |

|                |                |           |             |
|----------------|----------------|-----------|-------------|
| A_23_P85903    | TLR5           | 2.1633687 | 0.006957888 |
| A_32_P46981    | HSBP1L1        | 2.162145  | 0.002342471 |
| A_23_P393749   | CATSPER3       | 2.1603346 | 0.006849113 |
| A_33_P3371819  | PTCD2          | 2.1585398 | 0.004185117 |
| A_32_P149492   | NBPF11         | 2.1578057 | 0.005036137 |
| A_33_P3247848  | ZNF814         | 2.1562374 | 0.005454149 |
| A_24_P375205   | MKL2           | 2.1557267 | 0.00648813  |
| A_32_P94667    | PDE4DIP        | 2.1548665 | 0.003451035 |
| A_23_P66260    | ZNF267         | 2.1548028 | 0.002570269 |
| A_23_P379034   | BAIAP2L2       | 2.149972  | 0.002410038 |
| A_23_P205789   | GABPB1         | 2.149871  | 0.00430927  |
| A_24_P151      | KCNAB2         | 2.1487637 | 0.004497804 |
| A_21_P0012067  |                | 2.148678  | 0.02359825  |
| A_23_P72117    | SMPDL3A        | 2.1485612 | 0.003360936 |
| A_23_P69497    | CLEC3B         | 2.1483107 | 0.020448163 |
| A_33_P3264528  | HOXA11         | 2.147989  | 0.002604608 |
| A_33_P3503937  | LOC284581      | 2.1479182 | 0.002365526 |
| A_21_P0011780  | LINC01534      | 2.147787  | 0.03703331  |
| A_23_P65068    | EID3           | 2.146795  | 0.003820764 |
| A_19_P00321339 | LOC102724384   | 2.1458187 | 0.02038056  |
| A_32_P194779   | ZBTB34         | 2.144608  | 0.004559499 |
| A_23_P64173    | CARD16         | 2.1429713 | 0.002504885 |
| A_23_P133408   | CSF2           | 2.1428685 | 0.002689975 |
| A_23_P253484   | AADAT          | 2.1421895 | 0.006540505 |
| A_23_P111865   | ZSCAN21        | 2.141286  | 0.002834088 |
| A_33_P3279109  | ZNF75A         | 2.1409411 | 0.00290641  |
| A_33_P3214785  | LEPROT         | 2.1408846 | 0.014104866 |
| A_33_P3254756  | UBA6-AS1       | 2.1403542 | 0.007763105 |
| A_19_P00321739 | LINC00472      | 2.1377392 | 0.03324276  |
| A_21_P0010635  | LINC01057      | 2.136448  | 0.005170828 |
| A_33_P3365988  | TGFB2-AS1      | 2.1298695 | 0.026708758 |
| A_21_P0001934  | lnc-DHRS9-1    | 2.1294165 | 0.04109695  |
| A_21_P0013553  |                | 2.1291866 | 0.03785832  |
| A_33_P3424462  | CNST           | 2.12622   | 0.004396845 |
| A_21_P0010993  | LOC101929174   | 2.1254246 | 0.040696267 |
| A_33_P3341722  |                | 2.1242855 | 0.003617131 |
| A_33_P3409904  | VAMP4          | 2.1226795 | 0.00689457  |
| A_24_P336931   | ANKRD36        | 2.1223907 | 0.002495632 |
| A_33_P3336282  | TAF4B          | 2.1200461 | 0.004592801 |
| A_23_P96688    | SUV420H1       | 2.119106  | 0.004134025 |
| A_33_P3220723  | KIAA0922       | 2.1183176 | 0.003118136 |
| A_23_P382602   | BCL9           | 2.1176739 | 0.007351313 |
| A_23_P397019   | DNAJC25        | 2.1163175 | 0.003472808 |
| A_23_P32135    | C9orf9         | 2.1156867 | 0.005549027 |
| A_21_P0012409  | XLOC_l2_009968 | 2.1143472 | 0.003231027 |
| A_33_P3320493  | RAI1           | 2.1120427 | 0.042722773 |
| A_33_P3247175  | C4orf47        | 2.110868  | 0.01437681  |
| A_33_P3368800  | NBPF12         | 2.110823  | 0.004233921 |
| A_23_P319565   | PGBD3          | 2.1107125 | 0.002859296 |
| A_23_P38505    | CXCL16         | 2.1082916 | 0.003668529 |
| A_33_P3343316  | SH3BGRL2       | 2.1065807 | 0.005351469 |
| A_21_P0011510  | ALOX12P2       | 2.1054852 | 0.006448097 |
| A_19_P00321383 |                | 2.105082  | 0.002691234 |
| A_33_P3339687  | ZNF669         | 2.104639  | 0.029907167 |
| A_24_P171058   | TMEM64         | 2.1041512 | 0.00593089  |
| A_24_P118011   | PRORSD1P       | 2.103782  | 0.016506672 |
| A_24_P332081   | JAKMIP3        | 2.1024494 | 0.007495532 |
| A_23_P387471   | MICB           | 2.102423  | 0.030915538 |
| A_33_P3354267  | AKIRIN1        | 2.0997608 | 0.00280331  |
| A_23_P150609   | IGF2           | 2.0993905 | 0.002698865 |
| A_21_P0010633  | LINC01057      | 2.0986295 | 0.003755679 |
| A_23_P151133   | TSPAN9         | 2.0985591 | 0.002976553 |
| A_33_P3351999  |                | 2.09797   | 0.003999764 |



|                |                |           |             |
|----------------|----------------|-----------|-------------|
| A_23_P342600   | STK35          | 2.096195  | 0.00766607  |
| A_33_P3260455  |                | 2.0960665 | 0.004072531 |
| A_23_P128940   | VCPKMT         | 2.0956643 | 0.00300372  |
| A_21_P0003320  | LOC100996286   | 2.0954034 | 0.03380032  |
| A_23_P161507   | MTL5           | 2.0951178 | 0.004210283 |
| A_24_P409494   | BCL2L13        | 2.0926337 | 0.005580861 |
| A_23_P216568   | FAM206A        | 2.0923703 | 0.003163538 |
| A_21_P0000023  | RIOK2          | 2.0921433 | 0.003246274 |
| A_23_P23443    | EFHD2          | 2.0908775 | 0.002671141 |
| A_19_P00318183 | LINC01197      | 2.0901487 | 0.003068817 |
| A_33_P3256778  | CNTF           | 2.0899558 | 0.005886301 |
| A_33_P3374190  | INPP5A         | 2.0896058 | 0.004720216 |
| A_24_P18146    | PSD3           | 2.088881  | 0.003105478 |
| A_23_P217968   | SUV420H1       | 2.0884974 | 0.002870117 |
| A_21_P0014184  | Inc-GLCC11-2   | 2.0861099 | 0.036095593 |
| A_21_P0010775  | PARP8          | 2.0850317 | 0.003897053 |
| A_33_P3327822  | SH3BGR         | 2.0828187 | 0.015848553 |
| A_33_P3363355  | ICAM4          | 2.0813344 | 0.004628265 |
| A_21_P0012815  | LOC102723888   | 2.0810711 | 0.03890549  |
| A_33_P3399248  | UFM1           | 2.0801046 | 0.002914541 |
| A_33_P3347937  | HSF1           | 2.079343  | 0.025684714 |
| A_33_P3379017  | HIC2           | 2.0788834 | 0.022970568 |
| A_21_P0014094  |                | 2.0781107 | 0.014680336 |
| A_21_P0009763  | Inc-ANKRD27-2  | 2.0765166 | 0.010604191 |
| A_21_P0003885  | LRPAP1         | 2.0757127 | 0.005096579 |
| A_24_P284584   | ZNF559         | 2.0756128 | 0.008620925 |
| A_24_P194748   | ZNF275         | 2.075146  | 0.0072534   |
| A_24_P239606   | GADD45B        | 2.0749876 | 0.003022886 |
| A_33_P3322730  |                | 2.0746791 | 0.007442316 |
| A_21_P0013727  | LOC101928413   | 2.0743067 | 0.003045316 |
| A_32_P215938   | GPSM1          | 2.0739467 | 0.003337595 |
| A_24_P257416   | CXCL2          | 2.0720942 | 0.002949484 |
| A_33_P3285047  | ZNF75A         | 2.070542  | 0.005956265 |
| A_33_P3255631  | ZNF780A        | 2.0695148 | 0.005093383 |
| A_23_P127948   | ADM            | 2.0692368 | 0.006540628 |
| A_33_P3280603  | PPP4R1L        | 2.0689223 | 0.048183367 |
| A_23_P44836    | NT5DC2         | 2.0677047 | 0.007124629 |
| A_24_P261567   | GDPD5          | 2.0666268 | 0.040011726 |
| A_33_P3777584  | SERAC1         | 2.0662553 | 0.004688374 |
| A_33_P3245066  | SLC35E2B       | 2.0643327 | 0.002951203 |
| A_21_P0012215  |                | 2.06351   | 0.023906982 |
| A_23_P112774   | PTP4A3         | 2.0604057 | 0.004697217 |
| A_33_P3422439  |                | 2.0596294 | 0.025183223 |
| A_33_P3211634  | PPIL6          | 2.058613  | 0.011155571 |
| A_33_P3419545  | CDADC1         | 2.0584536 | 0.003796231 |
| A_23_P1691     | MMP1           | 2.0578809 | 0.003742439 |
| A_23_P19673    | SGK1           | 2.0571885 | 0.004399689 |
| A_23_P74663    | TAF1A          | 2.0567133 | 0.007189121 |
| A_33_P3367850  | CHRM4          | 2.0560172 | 0.021280922 |
| A_33_P3325467  | SMIM12         | 2.055647  | 0.004570478 |
| A_33_P3342345  | XLOC_I2_004817 | 2.055311  | 0.032968804 |
| A_32_P110390   | TMEM171        | 2.0549653 | 0.006964875 |
| A_33_P3326927  | ZNF19          | 2.0526662 | 0.022447618 |
| A_33_P3797820  | LOC102723652   | 2.0523791 | 0.005274509 |
| A_21_P0012273  | NBEA           | 2.0508337 | 0.009029138 |
| A_24_P192805   | CARD17         | 2.0496361 | 0.010253011 |
| A_24_P392022   | EEF2KMT        | 2.049233  | 0.004352545 |
| A_21_P0013960  | LOC101930246   | 2.0491757 | 0.004620124 |
| A_23_P254212   | RPA4           | 2.0463321 | 0.014451476 |
| A_19_P00322977 | LINC-PINT      | 2.0454645 | 0.003007682 |
| A_24_P365015   | HOXB13         | 2.0453463 | 0.011469111 |
| A_23_P7325     | BST1           | 2.0411665 | 0.016115405 |
| A_33_P3405789  | TULP3          | 2.040952  | 0.008412275 |

|                |                |            |             |
|----------------|----------------|------------|-------------|
| A_33_P3242863  | NT5M           | 2.039989   | 0.003913104 |
| A_33_P3363091  | VAC14          | 2.0399885  | 0.00648794  |
| A_24_P100368   | DYNLT3         | 2.039178   | 0.004082388 |
| A_24_P16913    | ABCC4          | 2.0388052  | 0.016253177 |
| A_32_P232035   | LOC100270746   | 2.038136   | 0.005569504 |
| A_21_P0013523  | OTUD6B-AS1     | 2.0367653  | 0.005243811 |
| A_23_P501805   | LIPT1          | 2.0358808  | 0.003083327 |
| A_23_P47885    | LRIG3          | 2.0356064  | 0.003246393 |
| A_24_P795371   | NR2F2-AS1      | 2.0354977  | 0.007342006 |
| A_24_P21447    | SURF6          | 2.0341542  | 0.003167084 |
| A_33_P3245412  | TRMT10B        | 2.0339582  | 0.003775242 |
| A_23_P414308   | FLCN           | 2.0330431  | 0.003530843 |
| A_33_P3278911  | PHF20L1        | 2.031573   | 0.013324673 |
| A_23_P13094    | MMP10          | 2.0313258  | 0.005318083 |
| A_33_P3862375  | USP45          | 2.029774   | 0.003345891 |
| A_23_P20970    | ATG12          | 2.029585   | 0.003146248 |
| A_21_P0011951  | XLOC_I2_008203 | 2.0295327  | 0.003574472 |
| A_21_P0010742  |                | 2.0283349  | 0.010370392 |
| A_33_P3252800  | PTPRR          | 2.0275235  | 0.003237856 |
| A_23_P27724    | SEPW1          | 2.0275037  | 0.004636312 |
| A_21_P0011758  | XLOC_I2_007097 | 2.0271442  | 0.005321061 |
| A_21_P0001704  | Inc-NBPF16-4   | 2.026628   | 0.003433566 |
| A_23_P254120   | FBXO9          | 2.0259423  | 0.003431693 |
| A_33_P3419835  | FBXL19-AS1     | 2.0248542  | 0.037398003 |
| A_33_P3389728  | NR5A2          | 2.023881   | 0.003566312 |
| A_33_P3399064  | RNA5-8S5       | 2.0238602  | 0.003262517 |
| A_21_P0000898  | MIR181A1HG     | 2.023117   | 0.015828986 |
| A_21_P0011949  | XLOC_I2_008203 | 2.0216265  | 0.004717266 |
| A_21_P0012780  |                | 2.0206764  | 0.005177946 |
| A_24_P147252   | ZNF23          | 2.0197067  | 0.004921486 |
| A_19_P00315631 | LOC101927668   | 2.0195816  | 0.015727822 |
| A_21_P0011536  | LRRC37BP1      | 2.0175931  | 0.013363573 |
| A_33_P3354796  | FLJ42627       | 2.017027   | 0.007330732 |
| A_19_P00321886 | LINC-PINT      | 2.0169253  | 0.003151682 |
| A_21_P0012208  | Inc-C21orf58-1 | 2.0152304  | 0.014494773 |
| A_33_P3420816  | GDF1           | 2.0142884  | 0.021432688 |
| A_23_P138461   | C10orf2        | 2.0141275  | 0.00596721  |
| A_21_P0010239  |                | 2.0131311  | 0.008394382 |
| A_23_P428219   | EZH1           | 2.0122776  | 0.004384397 |
| A_33_P3289286  | TMEM57         | 2.0115037  | 0.007815767 |
| A_33_P3345001  |                | 2.0104034  | 0.008105206 |
| A_33_P3371999  | TPPP           | 2.0089657  | 0.004171401 |
| A_23_P202905   | TIRAP          | 2.0089183  | 0.00457948  |
| A_23_P74778    | C1orf54        | 2.0088308  | 0.003194176 |
| A_21_P0008517  | LOC100506476   | 2.008419   | 0.01146649  |
| A_24_P176079   | WASF3          | 2.0080075  | 0.004342369 |
| A_23_P39542    | C2orf76        | 2.0077922  | 0.004658972 |
| A_19_P00322260 | LOC101929709   | 2.0072691  | 0.011849981 |
| A_21_P0006912  | Inc-SMC3-1     | 2.0069096  | 0.007416176 |
| A_23_P47924    | PTPRR          | 2.005187   | 0.006880164 |
| A_33_P3239455  | GTF2IRD2B      | 2.0032666  | 0.024939153 |
| A_21_P0014175  | LOC100506302   | 2.0029812  | 0.01129932  |
| A_24_P925635   | SEPT7P2        | 2.0027502  | 0.016691912 |
| A_33_P3330353  | MOSPD1         | 2.001049   | 0.00352457  |
| A_19_P00325336 |                | 2.0009985  | 0.038310222 |
| A_23_P69537    | NMU            | -2.0003507 | 0.003455797 |
| A_33_P3308446  | RHOB           | -2.000514  | 0.007238018 |
| A_24_P921933   | SRSF1          | -2.0034933 | 0.010602064 |
| A_23_P165783   | MLPH           | -2.0039997 | 0.003409183 |
| A_23_P348257   | NUAK1          | -2.0052772 | 0.003216404 |
| A_21_P0001178  | Inc-GOLPH3L-1  | -2.0054574 | 0.013246782 |
| A_23_P4160     | NBR2           | -2.006334  | 0.03495231  |
| A_23_P253586   | DOPEY2         | -2.0067208 | 0.009621458 |

|                |            |            |             |
|----------------|------------|------------|-------------|
| A_23_P42909    | TMEM139    | -2.00918   | 0.003526633 |
| A_33_P3344169  | DYX1C1     | -2.0098677 | 0.012910576 |
| A_23_P151307   | RAPGEF3    | -2.0126734 | 0.008006577 |
| A_23_P331748   | CD33       | -2.0164351 | 0.003287999 |
| A_33_P3351536  | PTK2B      | -2.0172293 | 0.006937373 |
| A_23_P3643     | DNASE1L2   | -2.017279  | 0.014343778 |
| A_24_P236935   | KLK6       | -2.0174258 | 0.006109681 |
| A_33_P3423121  | RDX        | -2.0190945 | 0.006363282 |
| A_33_P3865368  | LOC254896  | -2.020177  | 0.003889506 |
| A_33_P3253596  | KIF4A      | -2.0225773 | 0.006218116 |
| A_24_P408047   | PLEKHA4    | -2.0227454 | 0.003400649 |
| A_24_P68079    | TRANK1     | -2.022923  | 0.007672886 |
| A_24_P235266   | GRB10      | -2.0236976 | 0.005485836 |
| A_19_P00320759 | FLJ32255   | -2.0237849 | 0.011519634 |
| A_23_P410613   | TMEM263    | -2.0246978 | 0.003198267 |
| A_23_P210900   | ACSS2      | -2.0261037 | 0.004304908 |
| A_33_P3397399  | PPP3CB     | -2.0261824 | 0.027935393 |
| A_24_P148796   | MST1       | -2.026949  | 0.004662524 |
| A_21_P0014313  |            | -2.027168  | 0.003346019 |
| A_23_P84872    | SECISBP2   | -2.0283446 | 0.005023708 |
| A_23_P365738   | ARC        | -2.0306733 | 0.016224507 |
| A_23_P159125   | SLC16A5    | -2.0310478 | 0.003930452 |
| A_23_P148047   | PTGER4     | -2.0318046 | 0.003980678 |
| A_23_P146444   | CORO2A     | -2.032329  | 0.011092204 |
| A_23_P35617    | PLCE1      | -2.032845  | 0.007752727 |
| A_23_P157793   | CA9        | -2.0329275 | 0.013632862 |
| A_33_P3338559  | RBBP4      | -2.0353076 | 0.005861934 |
| A_24_P134727   | TFAM       | -2.0373394 | 0.014125912 |
| A_23_P372848   | P2RX1      | -2.0378556 | 0.010088713 |
| A_33_P3290567  | WEE1       | -2.0394099 | 0.003040243 |
| A_33_P3303212  | CCDC74A    | -2.0399494 | 0.004799526 |
| A_23_P259166   | TCEAL4     | -2.0399897 | 0.003531459 |
| A_23_P77661    | ZNF720     | -2.040056  | 0.005050858 |
| A_33_P3227225  |            | -2.041559  | 0.009012925 |
| A_23_P390097   | TTC39B     | -2.0424042 | 0.015852852 |
| A_23_P33894    | MAGED2     | -2.0438035 | 0.003078346 |
| A_24_P161018   | PARP14     | -2.0443933 | 0.003292712 |
| A_33_P3413083  | RHEB       | -2.0454023 | 0.003580472 |
| A_32_P720220   | LINC01559  | -2.0462642 | 0.003647014 |
| A_23_P157628   | DEFB4A     | -2.0471714 | 0.010940613 |
| A_33_P3258392  | EDN1       | -2.0493724 | 0.011300291 |
| A_23_P52761    | MMP7       | -2.0500357 | 0.00326503  |
| A_24_P69095    | ENC1       | -2.0540283 | 0.004118657 |
| A_23_P96965    | SYNC       | -2.0541642 | 0.0035881   |
| A_33_P3387145  | SH3KBP1    | -2.0558884 | 0.008483267 |
| A_23_P134925   | BNIP3L     | -2.0578244 | 0.003052995 |
| A_32_P202759   | FAM171B    | -2.0590653 | 0.003701675 |
| A_23_P71379    | PSCA       | -2.0603125 | 0.0056471   |
| A_33_P3349947  | TCP1       | -2.0612667 | 0.003119837 |
| A_33_P3322724  | POLR3A     | -2.061681  | 0.004272394 |
| A_23_P167269   | TMA16      | -2.0621204 | 0.004745028 |
| A_23_P3042     | PPP2R5E    | -2.0644405 | 0.002869613 |
| A_33_P3380417  | SLC25A30   | -2.0680351 | 0.009227547 |
| A_33_P3276693  | PGF        | -2.070056  | 0.002828791 |
| A_23_P100203   | HSBP1      | -2.0714395 | 0.004018243 |
| A_23_P35082    | SESN2      | -2.0719235 | 0.004662927 |
| A_24_P67534    | SMIM10     | -2.0722399 | 0.005454397 |
| A_23_P203665   | ACER3      | -2.0726752 | 0.003566505 |
| A_33_P3298980  |            | -2.0740414 | 0.006434071 |
| A_23_P97123    | ANKRD36BP1 | -2.0749886 | 0.00591929  |
| A_21_P0004593  |            | -2.0753884 | 0.008807305 |
| A_33_P3494748  | TMEM65     | -2.0763538 | 0.002903131 |
| A_33_P3258061  | PALM3      | -2.0776193 | 0.009564115 |

|                |              |            |             |
|----------------|--------------|------------|-------------|
| A_21_P0013462  |              | -2.0783699 | 0.00331333  |
| A_21_P0006520  | Inc-ATP2B3-1 | -2.0788167 | 0.015593748 |
| A_24_P38347    | DPYSL2       | -2.0790403 | 0.00617608  |
| A_24_P254551   | ARHGEF9      | -2.079248  | 0.003713943 |
| A_24_P873414   | PLEKHB2      | -2.0808396 | 0.003219724 |
| A_23_P206059   | PRC1         | -2.0816672 | 0.002783165 |
| A_33_P3503537  | LOC285178    | -2.082478  | 0.005462611 |
| A_19_P00323454 | KANSL1-AS1   | -2.082517  | 0.008740024 |
| A_32_P18440    | ARID5B       | -2.0833874 | 0.004367198 |
| A_21_P0007133  |              | -2.0863564 | 0.006630396 |
| A_23_P334870   | TMEM217      | -2.0869546 | 0.008269058 |
| A_23_P381102   | CCDC74B      | -2.087682  | 0.007871661 |
| A_23_P130515   | CEACAM3      | -2.0878847 | 0.006703384 |
| A_23_P359277   | ELOVL7       | -2.0880778 | 0.002877147 |
| A_23_P109881   | ITIH4        | -2.0884578 | 0.0268562   |
| A_23_P86900    | B4GAT1       | -2.0934157 | 0.002777269 |
| A_23_P46170    | MED8         | -2.0934541 | 0.002643682 |
| A_23_P501933   | CACNG6       | -2.093742  | 0.002874352 |
| A_19_P00320440 | LINC00662    | -2.0954237 | 0.006151612 |
| A_23_P87082    | ROBO3        | -2.0956597 | 0.00767842  |
| A_23_P121795   | SORBS2       | -2.0961697 | 0.00426854  |
| A_24_P331704   | KRT80        | -2.0963657 | 0.002870122 |
| A_23_P132159   | USP18        | -2.098858  | 0.003849482 |
| A_23_P57306    | CHAF1B       | -2.099529  | 0.003003629 |
| A_33_P3231297  | CREG1        | -2.1002982 | 0.002770887 |
| A_23_P315206   | CCBL1        | -2.1017823 | 0.009730545 |
| A_32_P218025   | LOC100506253 | -2.1021175 | 0.003981647 |
| A_21_P0011456  | PLA2G10      | -2.1021373 | 0.007509693 |
| A_23_P10182    | ACOX2        | -2.10246   | 0.002935863 |
| A_32_P231446   | HIPK1        | -2.1038191 | 0.003101218 |
| A_23_P89410    | BECN1        | -2.1042037 | 0.002923851 |
| A_23_P108437   | FZD5         | -2.1050892 | 0.003123174 |
| A_23_P53126    | LMO2         | -2.106353  | 0.003329007 |
| A_23_P93641    | AKR1B10      | -2.107807  | 0.003195762 |
| A_24_P390060   | IQCD         | -2.1078913 | 0.006971908 |
| A_21_P0001676  | Inc-BTBD19-1 | -2.110945  | 0.008893146 |
| A_23_P213102   | PALLD        | -2.1115754 | 0.002674161 |
| A_24_P23995    | RNF187       | -2.1126504 | 0.002576282 |
| A_23_P372096   | NOL4L        | -2.1137624 | 0.005806275 |
| A_32_P178966   | TMEM170B     | -2.1146467 | 0.004735326 |
| A_23_P411612   | SPRYD4       | -2.1150434 | 0.019740814 |
| A_23_P8196     | ME1          | -2.1164165 | 0.003733024 |
| A_33_P3380992  | AKR1B15      | -2.1171825 | 0.00482895  |
| A_19_P00321259 | LINC01133    | -2.1177394 | 0.003247993 |
| A_23_P14774    | CTSH         | -2.1189141 | 0.002521896 |
| A_23_P202810   | OVOL1        | -2.1191328 | 0.002991255 |
| A_33_P3307495  | STRA6        | -2.1203897 | 0.003711849 |
| A_23_P418199   | LOC730098    | -2.1207376 | 0.00312954  |
| A_21_P0014096  |              | -2.121305  | 0.020418642 |
| A_24_P16124    | IFITM4P      | -2.122957  | 0.011837528 |
| A_24_P944299   | CDC42BPA     | -2.1233687 | 0.003209366 |
| A_24_P37540    | ARPC4-TTLL3  | -2.1244154 | 0.006482344 |
| A_24_P371962   | AMD1         | -2.1248987 | 0.002553176 |
| A_23_P400298   | PRSS22       | -2.1251233 | 0.003888528 |
| A_24_P334640   | PAQR8        | -2.127717  | 0.022430064 |
| A_23_P148475   | KIF4A        | -2.1301112 | 0.003398434 |
| A_23_P218579   | GLB1L        | -2.130402  | 0.00252229  |
| A_23_P209735   | ARMC9        | -2.1305685 | 0.003305579 |
| A_21_P0007885  | LOC643770    | -2.131256  | 0.003598702 |
| A_24_P345451   | CYBRD1       | -2.133121  | 0.022605747 |
| A_23_P24784    | TNNI2        | -2.1338372 | 0.036932707 |
| A_33_P3263841  | RCHY1        | -2.134291  | 0.002901928 |
| A_21_P0009781  | UCA1         | -2.1383185 | 0.01592829  |

|                |              |            |             |
|----------------|--------------|------------|-------------|
| A_24_P376339   | CCNL2        | -2.138506  | 0.00253468  |
| A_23_P152949   | LRRC46       | -2.1390269 | 0.00480613  |
| A_23_P166823   | TNNC1        | -2.1391912 | 0.002874457 |
| A_23_P133058   | MRFAP1L1     | -2.1392787 | 0.002607843 |
| A_24_P230938   | MORN4        | -2.1396773 | 0.029521374 |
| A_23_P137016   | SAT1         | -2.1398287 | 0.003181492 |
| A_33_P3316223  | SNAPC1       | -2.1402946 | 0.00532155  |
| A_33_P3302957  | PLEKHG4      | -2.140343  | 0.016577592 |
| A_21_P0014894  |              | -2.1412501 | 0.006213323 |
| A_33_P3268313  | PGAM2        | -2.1420832 | 0.007572125 |
| A_23_P167308   | RNF4         | -2.143557  | 0.002417343 |
| A_33_P3371718  | SAT1         | -2.144131  | 0.002900543 |
| A_24_P30194    | IFIT5        | -2.1445136 | 0.0358973   |
| A_24_P703830   | NANOS3       | -2.144719  | 0.003755946 |
| A_33_P3237096  | INPP5F       | -2.1464798 | 0.003215285 |
| A_33_P3210099  | ALPK3        | -2.1468165 | 0.009171036 |
| A_33_P3309859  | Inc-FAM43A-2 | -2.1474879 | 0.0069003   |
| A_33_P3210278  | SYNE2        | -2.147996  | 0.00293258  |
| A_19_P00809417 | ATF7IP2      | -2.152589  | 0.002503634 |
| A_24_P101617   |              | -2.1526058 | 0.004673892 |
| A_24_P307580   | HTATIP2      | -2.152929  | 0.003160537 |
| A_24_P112160   | UPK3B        | -2.1563385 | 0.003502069 |
| A_32_P66881    | TLR4         | -2.156874  | 0.006102856 |
| A_33_P3338186  | HEXDC        | -2.1576517 | 0.002867477 |
| A_23_P58506    | ELL2         | -2.1585326 | 0.003566678 |
| A_33_P3390778  | TRIM46       | -2.1612122 | 0.004918966 |
| A_21_P0011633  | KRT14        | -2.161231  | 0.020060038 |
| A_24_P398940   | CASC4        | -2.1648414 | 0.004591031 |
| A_21_P0007747  | LOC643770    | -2.1651208 | 0.007476148 |
| A_24_P254705   | ZNF695       | -2.1659951 | 0.002546679 |
| A_33_P3278058  | PIH1D2       | -2.1676724 | 0.003259886 |
| A_32_P152437   | AKAP12       | -2.1679986 | 0.003005606 |
| A_23_P219197   | RGS3         | -2.1689038 | 0.002938688 |
| A_24_P928052   | NRP1         | -2.1691403 | 0.00259658  |
| A_24_P916141   | DCAF7        | -2.1700044 | 0.003698708 |
| A_24_P921897   | HOOK1        | -2.170619  | 0.005397609 |
| A_19_P00317272 | LINC01191    | -2.173837  | 0.01919296  |
| A_23_P82588    | C7orf55      | -2.1748648 | 0.003581719 |
| A_33_P3258782  | AP1S2        | -2.1750448 | 0.004711327 |
| A_24_P77082    | KMO          | -2.1751933 | 0.002281901 |
| A_23_P8083     | LY6G6C       | -2.1756103 | 0.005211407 |
| A_24_P752208   |              | -2.1774788 | 0.013246406 |
| A_19_P00315717 | FAM200B      | -2.1778793 | 0.00248073  |
| A_33_P3447441  | Inc-WDR1-1   | -2.178343  | 0.002370967 |
| A_33_P3296181  | CCL3L3       | -2.1789675 | 0.003033403 |
| A_23_P86021    | SELENBP1     | -2.1808076 | 0.00278056  |
| A_24_P181101   | TMEM135      | -2.1815436 | 0.00252776  |
| A_24_P48204    | SECTM1       | -2.1820319 | 0.003287043 |
| A_24_P128524   | ICMT         | -2.1843772 | 0.04568627  |
| A_23_P117782   | LARP6        | -2.185081  | 0.00300297  |
| A_24_P64126    | CPNE3        | -2.186058  | 0.002605083 |
| A_23_P216225   | EGR3         | -2.188331  | 0.003858259 |
| A_24_P944616   | HP1BP3       | -2.1894076 | 0.002328445 |
| A_23_P431346   | PRR15        | -2.1902342 | 0.002249342 |
| A_23_P152082   | SPTBN5       | -2.190615  | 0.004176032 |
| A_24_P129341   | AKR1B10      | -2.1919005 | 0.003777612 |
| A_33_P3309556  | PTPRE        | -2.1927197 | 0.009725562 |
| A_33_P3332215  | MUC1         | -2.195751  | 0.003509686 |
| A_23_P200493   | LBR          | -2.1960404 | 0.002457945 |
| A_32_P37592    | SCARNA17     | -2.1960866 | 0.003172485 |
| A_24_P323598   | ESCO2        | -2.196669  | 0.002598139 |
| A_24_P331560   | STS          | -2.1975994 | 0.004632051 |
| A_32_P86763    | TGM2         | -2.1981711 | 0.004392372 |

|                |                  |            |             |
|----------------|------------------|------------|-------------|
| A_23_P103617   | ANXA9            | -2.1996253 | 0.002378017 |
| A_23_P2271     | PTHLH            | -2.199753  | 0.003367313 |
| A_21_P0003294  | Inc-NAA50-2      | -2.201331  | 0.009772847 |
| A_23_P69738    | RASL11B          | -2.2014985 | 0.040172797 |
| A_23_P113793   | ZBED2            | -2.2020004 | 0.002341719 |
| A_23_P156687   | CFB              | -2.2060692 | 0.02565863  |
| A_24_P270728   | NUPR1            | -2.2078977 | 0.002898963 |
| A_33_P3388391  | GJB4             | -2.2080228 | 0.002622858 |
| A_33_P3270863  | XDH              | -2.2088647 | 0.002172546 |
| A_33_P3243702  | KLHL30           | -2.2096121 | 0.009676041 |
| A_33_P3318581  | PLOD2            | -2.21089   | 0.002441879 |
| A_21_P0004564  | Inc-AC008394.1-1 | -2.2119775 | 0.00692281  |
| A_24_P174503   | AMT              | -2.2141757 | 0.006867558 |
| A_24_P927189   | OXNAD1           | -2.2143452 | 0.002925522 |
| A_23_P154411   | PPIG             | -2.2152255 | 0.006055099 |
| A_23_P102037   | COQ10B           | -2.2157784 | 0.002792652 |
| A_33_P3392391  | CPT1C            | -2.217171  | 0.017853802 |
| A_32_P209094   | FGGY             | -2.2180293 | 0.002609081 |
| A_33_P3306153  | KIAA1841         | -2.2189722 | 0.003297517 |
| A_23_P214821   | EDN1             | -2.221394  | 0.002176677 |
| A_23_P118203   | ZG16B            | -2.2224402 | 0.004991957 |
| A_23_P210763   | JAG1             | -2.2236905 | 0.002690995 |
| A_33_P3398597  | EPS8L1           | -2.2240589 | 0.002629229 |
| A_32_P88310    | LOC730183        | -2.2243972 | 0.005738013 |
| A_24_P115511   | RAB14            | -2.2276363 | 0.019221596 |
| A_24_P917886   | MUC5AC           | -2.228636  | 0.002210307 |
| A_19_P00321009 | LINC01133        | -2.2297213 | 0.00220741  |
| A_33_P3214466  | MESP1            | -2.2299645 | 0.002257878 |
| A_33_P3290919  | BAG1             | -2.2307873 | 0.002231087 |
| A_21_P0002549  | Inc-GPR55-2      | -2.2310526 | 0.028282223 |
| A_21_P0000132  | C16orf93         | -2.2331908 | 0.029321853 |
| A_23_P64617    | FZD4             | -2.2341475 | 0.002161633 |
| A_23_P26024    | C15orf48         | -2.243176  | 0.002099013 |
| A_24_P190472   | SLPI             | -2.2433932 | 0.002770536 |
| A_33_P3402615  | SLC6A9           | -2.246126  | 0.002146823 |
| A_23_P218817   | CPT1B            | -2.2480052 | 0.002730879 |
| A_23_P98995    | CALCOCO1         | -2.2483172 | 0.002115154 |
| A_23_P394395   | JPH2             | -2.2496433 | 0.017249933 |
| A_23_P252306   | ID1              | -2.2515943 | 0.002303258 |
| A_23_P141715   | TPGS2            | -2.2517192 | 0.001935466 |
| A_23_P257164   | AMT              | -2.2525988 | 0.003103421 |
| A_23_P137984   | S100A10          | -2.2531836 | 0.002147159 |
| A_23_P50000    | FAM57A           | -2.2547712 | 0.004004962 |
| A_23_P417415   | ACOT11           | -2.2565799 | 0.002566224 |
| A_24_P267592   | SAMHD1           | -2.25708   | 0.002204498 |
| A_23_P316487   | H2AFV            | -2.2573564 | 0.002225689 |
| A_23_P121527   | KLHL5            | -2.2576234 | 0.002319453 |
| A_23_P146654   | BAG1             | -2.2587976 | 0.002287329 |
| A_23_P217384   | AP1S2            | -2.2615592 | 0.002225365 |
| A_23_P38167    | GPRC5C           | -2.2645102 | 0.002220921 |
| A_23_P82868    | PLAT             | -2.264847  | 0.001917225 |
| A_24_P52697    | H19              | -2.2691944 | 0.002195033 |
| A_21_P0014013  |                  | -2.2710164 | 0.002187229 |
| A_33_P3232504  | CYSRT1           | -2.2726328 | 0.003490462 |
| A_23_P91140    | PECR             | -2.272936  | 0.00429829  |
| A_23_P116235   | MDK              | -2.2741911 | 0.002149233 |
| A_23_P46936    | EGR2             | -2.2749846 | 0.003174444 |
| A_24_P364236   | NDUFC2           | -2.2755098 | 0.002677951 |
| A_24_P9090     | HNRNPDL          | -2.2767248 | 0.00341907  |
| A_24_P253251   | SLC7A1           | -2.279076  | 0.002612826 |
| A_33_P3252884  | PHF12            | -2.279237  | 0.002221793 |
| A_33_P3352307  | RPS6KA1          | -2.2795677 | 0.003112798 |
| A_19_P00323082 | H19              | -2.2798016 | 0.004002925 |

|                |                |            |             |
|----------------|----------------|------------|-------------|
| A_24_P95439    | CARS           | -2.2820966 | 0.002045019 |
| A_23_P409438   | IFNL2          | -2.2832026 | 0.002267617 |
| A_33_P3728167  | CDH5           | -2.2838159 | 0.005289935 |
| A_32_P176018   | ACTL8          | -2.2838886 | 0.002089123 |
| A_33_P3328772  | PLEKHA5        | -2.2847946 | 0.035949226 |
| A_23_P128817   | PCK2           | -2.2854888 | 0.003656985 |
| A_33_P3330498  | ALDH7A1        | -2.2857246 | 0.010554615 |
| A_23_P15348    | MPRIP          | -2.286103  | 0.003554202 |
| A_19_P00321010 | LINC01133      | -2.2861102 | 0.00259595  |
| A_32_P14610    | PDLIM5         | -2.286796  | 0.001987623 |
| A_24_P228130   | CCL3L3         | -2.286892  | 0.003160371 |
| A_21_P0014351  | SP2-AS1        | -2.287338  | 0.003866935 |
| A_33_P3235410  | PTPLA          | -2.287981  | 0.003420347 |
| A_23_P106741   | PSMD7          | -2.2893007 | 0.00327732  |
| A_23_P133543   | KLHL3          | -2.2895584 | 0.010248584 |
| A_24_P450285   | CCDC153        | -2.2910106 | 0.002043617 |
| A_21_P0007626  |                | -2.2929332 | 0.012870353 |
| A_33_P3397940  | CALML3-AS1     | -2.2972438 | 0.006766254 |
| A_23_P138194   | NCF2           | -2.298043  | 0.001872252 |
| A_23_P137856   | MUC1           | -2.3011632 | 0.002359101 |
| A_23_P217737   | ATP7A          | -2.3018427 | 0.002269121 |
| A_33_P3360341  | GATA3          | -2.3037863 | 0.001803706 |
| A_23_P389919   | WHSC1          | -2.306138  | 0.001818221 |
| A_23_P416468   | PIF1           | -2.308387  | 0.004393946 |
| A_33_P3386117  | RER1           | -2.3087249 | 0.001904942 |
| A_33_P3238920  | INPP5F         | -2.3093004 | 0.002945815 |
| A_24_P84608    |                | -2.309736  | 0.003730817 |
| A_32_P76720    | NT5DC3         | -2.309852  | 0.002715836 |
| A_21_P0013113  | XLOC_I2_013189 | -2.3143542 | 0.003787187 |
| A_24_P158421   | SAR1A          | -2.3212183 | 0.002576238 |
| A_33_P3290924  | BAG1           | -2.3219724 | 0.002088364 |
| A_24_P295010   | SERPINB9       | -2.3246036 | 0.002189778 |
| A_33_P3389827  | PROM2          | -2.325261  | 0.00265469  |
| A_23_P24157    | PYROXD2        | -2.326433  | 0.007791312 |
| A_23_P135722   | BTC            | -2.3273087 | 0.003816631 |
| A_33_P3246505  | MAP3K8         | -2.3284056 | 0.007433513 |
| A_33_P3288659  | ACTL8          | -2.3289137 | 0.004460415 |
| A_24_P248606   | ACSL3          | -2.329013  | 0.001733559 |
| A_23_P252471   | PECAM1         | -2.329763  | 0.005334836 |
| A_33_P3866631  | DKFZP564C152   | -2.3300393 | 0.001861716 |
| A_33_P3499174  | URM1           | -2.3309205 | 0.002668628 |
| A_24_P120251   | TM4SF18        | -2.332246  | 0.004011405 |
| A_23_P21207    | UBA7           | -2.3393648 | 0.00306308  |
| A_23_P23438    | SEMA4A         | -2.340282  | 0.002967184 |
| A_33_P3423979  | PALLD          | -2.3405647 | 0.001726723 |
| A_24_P857624   | TNRC6C-AS1     | -2.3409772 | 0.002689214 |
| A_33_P3318668  | CYSRT1         | -2.3466768 | 0.002077994 |
| A_33_P3217704  | FAM214B        | -2.3477006 | 0.009941967 |
| A_24_P80532    | CCNG2          | -2.3478882 | 0.007298547 |
| A_33_P3461416  | GP6            | -2.3483434 | 0.003325216 |
| A_23_P103601   | MAN1C1         | -2.3491342 | 0.006658063 |
| A_33_P3314176  | FAM46C         | -2.3526366 | 0.01537869  |
| A_23_P125643   | ASB9           | -2.3542655 | 0.001722254 |
| A_23_P86100    | KLHDC9         | -2.3563473 | 0.002602277 |
| A_23_P4190     | ACSF2          | -2.357932  | 0.001874972 |
| A_33_P3234697  | LXN            | -2.3621187 | 0.001954838 |
| A_23_P54469    | ISL2           | -2.3623502 | 0.006336391 |
| A_23_P64721    | HCAR3          | -2.3651211 | 0.010993619 |
| A_23_P215227   | DNAJB6         | -2.3706558 | 0.001869127 |
| A_23_P30495    | HMGCR          | -2.3724556 | 0.001649062 |
| A_21_P0005252  | LOC340340      | -2.3744366 | 0.002214966 |
| A_23_P205959   | ALDH1A3        | -2.3750997 | 0.002040342 |
| A_33_P3313796  | CCDC34         | -2.3771894 | 0.001715134 |

|               |             |            |             |
|---------------|-------------|------------|-------------|
| A_24_P41570   | H2AFZ       | -2.3790247 | 0.001941638 |
| A_24_P335305  | OAS3        | -2.3795893 | 0.00340444  |
| A_32_P32653   | SENP5       | -2.3807592 | 0.001740263 |
| A_23_P166459  | LGALS1      | -2.3876512 | 0.002028134 |
| A_33_P3332547 | IQCJ-SCHIP1 | -2.3882992 | 0.003100894 |
| A_32_P163147  | VSIG1       | -2.3892035 | 0.004693987 |
| A_33_P3326210 | ESCO2       | -2.3899946 | 0.002640285 |
| A_23_P216455  | RLN2        | -2.3903253 | 0.001628082 |
| A_24_P1255    | BCCIP       | -2.391139  | 0.002020888 |
| A_23_P11286   | HNRNPH2     | -2.3967533 | 0.002452869 |
| A_32_P56249   | USP30-AS1   | -2.403358  | 0.02276962  |
| A_23_P90732   | PNKD        | -2.4055555 | 0.003291604 |
| A_23_P87049   | SORL1       | -2.4057138 | 0.001542546 |
| A_23_P500300  | TRIM15      | -2.4144425 | 0.001515104 |
| A_33_P3285911 | KIAA1919    | -2.4162164 | 0.001681671 |
| A_21_P0013246 | UPK3B       | -2.4190166 | 0.001936294 |
| A_23_P156880  | ENPP1       | -2.4239388 | 0.010977859 |
| A_33_P3333800 | NOXO1       | -2.4278946 | 0.002232962 |
| A_33_P3391603 | LAMA4       | -2.4312181 | 0.001551611 |
| A_33_P3540143 | IL17RA      | -2.4321225 | 0.001758102 |
| A_33_P3228593 |             | -2.4327898 | 0.017018802 |
| A_24_P255218  | MYO5A       | -2.4354932 | 0.002923626 |
| A_33_P3844650 | ANGPTL2     | -2.4359329 | 0.01646894  |
| A_23_P385771  | PAOX        | -2.437751  | 0.003740839 |
| A_23_P250735  | CBX7        | -2.4397125 | 0.001447689 |
| A_33_P3367396 | FAM177B     | -2.439784  | 0.03233022  |
| A_33_P3321432 | FAM198B     | -2.4399598 | 0.004086967 |
| A_23_P99661   | ARHGEF40    | -2.4406736 | 0.003270668 |
| A_24_P329487  | FAM84B      | -2.4408963 | 0.007397488 |
| A_23_P6651    | FAM208A     | -2.4417746 | 0.006752389 |
| A_24_P236091  | ENO2        | -2.4419844 | 0.002854733 |
| A_23_P83579   | ARNT2       | -2.4444098 | 0.008449281 |
| A_24_P393470  | MEF2BNB     | -2.445131  | 0.001644537 |
| A_24_P50245   | HLA-DMA     | -2.4473677 | 0.00638138  |
| A_23_P500861  | SYNE1       | -2.448261  | 0.00669805  |
| A_24_P10233   | DAPK2       | -2.4489756 | 0.002482705 |
| A_33_P3369844 | CD24        | -2.4504313 | 0.001481011 |
| A_33_P3292540 | CDKN2C      | -2.4505188 | 0.001438392 |
| A_23_P93881   | SYPL1       | -2.451295  | 0.00252498  |
| A_23_P328545  | GABRP       | -2.4530678 | 0.015335645 |
| A_21_P0000687 | NPPA-AS1    | -2.4549716 | 0.013084812 |
| A_33_P3405213 | PECAM1      | -2.4566824 | 0.001476461 |
| A_33_P3272395 | RAB19       | -2.4626224 | 0.01422585  |
| A_23_P2674    | KRT4        | -2.4649196 | 0.001504377 |
| A_24_P396650  | RPS6KA1     | -2.4721665 | 0.002565414 |
| A_24_P243749  | PDK4        | -2.475127  | 0.001529245 |
| A_24_P336718  | RABIF       | -2.4765499 | 0.019446503 |
| A_33_P3799692 |             | -2.477683  | 0.001745889 |
| A_33_P3344579 | DLD         | -2.482217  | 0.003284406 |
| A_23_P137543  | ZNF362      | -2.4847383 | 0.001991514 |
| A_24_P842006  | C16orf93    | -2.4877965 | 0.013164157 |
| A_33_P3358342 | SIAH2       | -2.4924922 | 0.001309946 |
| A_33_P3340154 | DGCR14      | -2.4926794 | 0.001420301 |
| A_33_P3410459 | SCARB2      | -2.4931326 | 0.001460788 |
| A_33_P3278941 | REC8        | -2.4946282 | 0.001707394 |
| A_33_P3230254 | NCAPG       | -2.4992166 | 0.001829316 |
| A_24_P71661   | CRTAP       | -2.4992476 | 0.00269793  |
| A_23_P111194  | SPDEF       | -2.5002916 | 0.001377409 |
| A_23_P106463  | OAZ2        | -2.5106483 | 0.001361118 |
| A_23_P250607  | PLS3        | -2.513801  | 0.001672004 |
| A_23_P92161   | ARL14       | -2.514883  | 0.001627548 |
| A_33_P3251054 | RNF38       | -2.517362  | 0.001432091 |
| A_33_P3341490 | KRT42P      | -2.5179892 | 0.002985139 |



|                |              |            |             |
|----------------|--------------|------------|-------------|
| A_24_P678104   | STMN3        | -2.5222893 | 0.001457109 |
| A_23_P18684    | CLGN         | -2.5232353 | 0.006409074 |
| A_23_P62081    | SCG5         | -2.5282907 | 0.001689892 |
| A_23_P24004    | IFIT2        | -2.5341802 | 0.001271653 |
| A_21_P0007235  | Inc-P2RY2-2  | -2.5343707 | 0.001394554 |
| A_33_P3210585  | AAK1         | -2.536488  | 0.00186819  |
| A_24_P8220     | HS6ST1       | -2.5424204 | 0.0012248   |
| A_21_P0010500  | GNAS-AS1     | -2.5428746 | 0.001214962 |
| A_23_P148556   | ABCD1        | -2.5466988 | 0.002105791 |
| A_23_P304897   | BDKRB2       | -2.5481148 | 0.001230192 |
| A_33_P3360972  | EXOC3L4      | -2.551479  | 0.001482283 |
| A_23_P259621   | LAT2         | -2.55175   | 0.001445541 |
| A_23_P416178   | CCDC136      | -2.5592656 | 0.002316057 |
| A_23_P256391   | GOLGA4       | -2.5595903 | 0.00170139  |
| A_23_P134714   | HRSP12       | -2.5639958 | 0.001885272 |
| A_23_P63243    | C1orf43      | -2.5642815 | 0.00197019  |
| A_33_P3241511  | SERPIND1     | -2.5694962 | 0.00124652  |
| A_23_P406135   | IFT172       | -2.5701463 | 0.001912266 |
| A_23_P42306    | HLA-DMA      | -2.580227  | 0.001314486 |
| A_33_P3248439  | MVB12B       | -2.580229  | 0.00131547  |
| A_33_P3268507  | CEACAM1      | -2.5814288 | 0.002325382 |
| A_21_P0000069  | VEPH1        | -2.5830338 | 0.001160961 |
| A_23_P53176    | FOLR1        | -2.586062  | 0.001690379 |
| A_33_P3417695  | ODF3B        | -2.5927587 | 0.002964977 |
| A_24_P412976   | TMEM143      | -2.5957043 | 0.001586377 |
| A_23_P39766    | GLS          | -2.5977402 | 0.001157079 |
| A_21_P0002781  | LINC01213    | -2.6007607 | 0.001297539 |
| A_23_P210210   | EPAS1        | -2.6072657 | 0.001455084 |
| A_24_P175187   | SAMD9        | -2.6109397 | 0.002217213 |
| A_33_P3358740  | OSBPL7       | -2.6122212 | 0.001105084 |
| A_21_P0000015  | PARP9        | -2.6123304 | 0.002404938 |
| A_33_P3385870  | CCNG2        | -2.6233137 | 0.001517198 |
| A_21_P0011928  | PEBP1        | -2.6295114 | 0.003023037 |
| A_21_P0007329  | Inc-CCDC34-1 | -2.6309452 | 0.006026684 |
| A_23_P29684    | VILL         | -2.6342165 | 0.001296374 |
| A_33_P3410194  |              | -2.6446948 | 0.001218224 |
| A_24_P304071   | IFIT2        | -2.6538227 | 0.002961431 |
| A_24_P29595    | STXBP5       | -2.6543825 | 0.002363629 |
| A_23_P339309   | LIN52        | -2.6583745 | 0.002021625 |
| A_23_P145694   | ASNS         | -2.6623354 | 0.001619032 |
| A_23_P102706   | SNPH         | -2.665381  | 0.001363072 |
| A_33_P3333317  | OPTN         | -2.6670275 | 0.001231967 |
| A_33_P3347869  | C3           | -2.6695523 | 0.001324437 |
| A_33_P3289218  | AAK1         | -2.6726027 | 0.001206808 |
| A_33_P3376249  | S100A2       | -2.680301  | 0.001255048 |
| A_23_P500000   | SCEL         | -2.6807678 | 0.001149498 |
| A_23_P53193    | SYTL2        | -2.683562  | 0.001187006 |
| A_23_P142574   | MOGAT1       | -2.6902714 | 0.001166194 |
| A_23_P156017   | GOLPH3       | -2.693187  | 0.001174233 |
| A_33_P3220919  | ADRBK2       | -2.6947215 | 0.001073493 |
| A_23_P65442    | IRF9         | -2.6968694 | 0.001249924 |
| A_23_P59950    | SLC39A14     | -2.70024   | 0.001464253 |
| A_33_P3420416  | LGALS9       | -2.702586  | 0.007546025 |
| A_23_P11224    | MMGT1        | -2.7060652 | 0.001519917 |
| A_19_P00326514 |              | -2.7062132 | 0.001250066 |
| A_32_P9382     | MZT1         | -2.7074063 | 9.72E-04    |
| A_23_P41390    | SH3TC1       | -2.7163398 | 0.005921239 |
| A_23_P329573   | ITGB2        | -2.7237668 | 0.002206422 |
| A_23_P217114   | ALAD         | -2.727831  | 0.002822263 |
| A_24_P101651   | CSAG4        | -2.730128  | 0.00159206  |
| A_24_P902728   | CAPRIN1      | -2.7312598 | 0.001047993 |
| A_33_P3340025  | GINS1        | -2.7316608 | 9.68E-04    |
| A_33_P3351101  | TYSND1       | -2.7337124 | 0.002221655 |

|                |                |            |             |
|----------------|----------------|------------|-------------|
| A_33_P3216610  | TMPRSS4        | -2.7364464 | 0.001095901 |
| A_33_P3377209  | ENSA           | -2.7444253 | 0.001002082 |
| A_23_P40240    | CTSZ           | -2.7487047 | 0.001484603 |
| A_33_P3374623  | ABCA7          | -2.7537515 | 9.33E-04    |
| A_23_P80048    | FER1L4         | -2.7543068 | 0.001294833 |
| A_24_P12435    | NCOA7          | -2.7555897 | 0.001001925 |
| A_19_P00805833 | ATF7IP2        | -2.7562082 | 0.001175023 |
| A_33_P3304170  | PIK3CG         | -2.7572541 | 9.51E-04    |
| A_23_P13604    | PEBP1          | -2.7623303 | 0.003282635 |
| A_23_P88865    | CMTM3          | -2.7650168 | 9.26E-04    |
| A_33_P3307875  | SPTSSA         | -2.7662764 | 0.001023063 |
| A_23_P255057   | SLC35A5        | -2.7674515 | 0.002567085 |
| A_21_P0000603  | ASB9P1         | -2.7676797 | 0.017972067 |
| A_33_P3359084  | TAS1R3         | -2.7742915 | 9.79E-04    |
| A_33_P3340342  | CMTM3          | -2.7869194 | 0.002613251 |
| A_23_P209055   | CD22           | -2.789982  | 0.016245142 |
| A_23_P155052   | APOL6          | -2.790268  | 0.001153622 |
| A_33_P3393170  | CAPN5          | -2.7914796 | 0.001771627 |
| A_33_P3413905  | ADM2           | -2.7968674 | 0.002709856 |
| A_33_P3369153  | KIF3C          | -2.7976148 | 0.007907297 |
| A_21_P0007122  | ZBED5-AS1      | -2.7998188 | 0.002975827 |
| A_32_P44394    | AIM2           | -2.8001926 | 0.001430455 |
| A_21_P0010626  | PSAT1          | -2.8028765 | 0.00103886  |
| A_23_P339240   | PLCH1          | -2.803311  | 0.005990509 |
| A_23_P85952    | DENND2D        | -2.803344  | 0.001067878 |
| A_32_P229746   | DNAJB6         | -2.8056016 | 0.001066158 |
| A_23_P139912   | IGFBP6         | -2.806464  | 0.002912123 |
| A_21_P0009342  | WFDC21P        | -2.807646  | 0.002160662 |
| A_21_P0010773  | FLJ43315       | -2.8115988 | 8.64E-04    |
| A_33_P3316587  | SLC22A18AS     | -2.8137987 | 0.001679936 |
| A_23_P84576    | ANTXR1         | -2.8164403 | 0.004743026 |
| A_33_P3298139  | CRLF2          | -2.8240604 | 0.006503127 |
| A_23_P127140   | RAB11FIP2      | -2.8258739 | 0.007568856 |
| A_33_P3363188  | FLJ43315       | -2.8320918 | 9.89E-04    |
| A_33_P3300308  | MAP1LC3A       | -2.8322635 | 0.007692381 |
| A_24_P354689   | SPOCK1         | -2.838123  | 0.001318362 |
| A_33_P3244803  | ACOX1          | -2.8518193 | 8.38E-04    |
| A_21_P0013177  | XLOC_l2_013293 | -2.8525877 | 0.001496112 |
| A_23_P48596    | RNASE1         | -2.8585298 | 9.12E-04    |
| A_24_P33982    | MILR1          | -2.8593113 | 9.95E-04    |
| A_23_P347468   | FZD3           | -2.8605793 | 8.88E-04    |
| A_23_P140146   | IFI27L2        | -2.8631442 | 0.001161453 |
| A_33_P3253234  | IQSEC2         | -2.8692946 | 8.24E-04    |
| A_21_P0011175  | CASC4          | -2.8739028 | 0.004921899 |
| A_32_P46238    | KRT17P5        | -2.8780181 | 0.01575803  |
| A_33_P3630780  | Inc-EGR3-1     | -2.883024  | 0.015221559 |
| A_23_P88767    | PLA2G10        | -2.8874967 | 8.03E-04    |
| A_33_P3395014  | ACOXL          | -2.892203  | 0.007059033 |
| A_33_P3214635  | FECH           | -2.8946097 | 0.001081342 |
| A_23_P81048    | STIM2          | -2.898807  | 8.81E-04    |
| A_23_P89941    | CDKN2D         | -2.8998313 | 8.38E-04    |
| A_23_P89030    | C16orf95       | -2.9030478 | 0.001317038 |
| A_24_P294832   | PTP4A1         | -2.9045777 | 9.28E-04    |
| A_19_P00805702 | C1GALT1        | -2.90575   | 0.003012453 |
| A_23_P315345   | PIN4           | -2.909041  | 0.001100421 |
| A_23_P388681   | ELAVL1         | -2.9096398 | 0.001102717 |
| A_24_P37409    | DUSP2          | -2.9115148 | 0.001992428 |
| A_24_P221485   |                | -2.918168  | 0.001755131 |
| A_24_P7594     | APOL6          | -2.9366145 | 0.001457572 |
| A_23_P209731   | ARMC9          | -2.94353   | 0.004084607 |
| A_23_P54758    | GDE1           | -2.948725  | 0.001828088 |
| A_24_P372134   | TMEM140        | -2.9489014 | 0.003664372 |
| A_21_P0000058  | PROM2          | -2.954769  | 8.19E-04    |

|               |                |            |             |
|---------------|----------------|------------|-------------|
| A_32_P87013   | CXCL8          | -2.9578924 | 0.025887154 |
| A_23_P204269  | USP15          | -2.95874   | 9.19E-04    |
| A_33_P3333982 | PDE4DIP        | -2.9590774 | 0.008725762 |
| A_33_P3303649 | MB             | -2.9633482 | 0.001311973 |
| A_24_P413988  | TGOLN2         | -2.980391  | 0.001152269 |
| A_33_P3697530 | SEMA4D         | -2.985638  | 0.001162371 |
| A_33_P3379916 | GLS            | -2.9872403 | 0.001751167 |
| A_23_P104073  | S100A3         | -2.9922395 | 0.001049407 |
| A_33_P3382177 | TIMP2          | -2.9934313 | 0.001036448 |
| A_32_P113508  | ATG16L1        | -2.9975808 | 7.50E-04    |
| A_33_P3363420 | FRMD3          | -2.9984448 | 8.23E-04    |
| A_32_P205241  | GJA3           | -3.0072994 | 0.01725774  |
| A_23_P207879  | CARD14         | -3.0108957 | 0.009713897 |
| A_33_P3336422 | ZBED5-AS1      | -3.0110626 | 0.001019365 |
| A_23_P81158   | ADH1C          | -3.0118504 | 0.002515264 |
| A_23_P49499   | ST6GALNAC2     | -3.018724  | 0.001078249 |
| A_33_P3230526 | MPRIP          | -3.0194504 | 0.030561604 |
| A_24_P38081   | FKBP5          | -3.0205903 | 0.001820982 |
| A_23_P253524  | CENPE          | -3.0248227 | 8.44E-04    |
| A_23_P154358  | PROM2          | -3.0380318 | 8.06E-04    |
| A_23_P63050   | UROD           | -3.0396907 | 0.001459329 |
| A_23_P141447  | RDM1           | -3.0408492 | 0.010713586 |
| A_21_P0000002 | ACBD7          | -3.0452018 | 0.013861166 |
| A_23_P23074   | IFI44          | -3.0568717 | 7.67E-04    |
| A_33_P3373750 | BRD4           | -3.0601208 | 6.60E-04    |
| A_23_P312851  | PMEL           | -3.0641413 | 0.001430047 |
| A_23_P250358  | HERC6          | -3.0660417 | 0.004575132 |
| A_23_P100001  | FAM174B        | -3.0718615 | 0.001103774 |
| A_32_P206899  | DNAH3          | -3.0733407 | 9.21E-04    |
| A_33_P3253807 | CEBPG          | -3.0795774 | 6.47E-04    |
| A_33_P3296846 | TMPRSS4        | -3.0813851 | 0.004158984 |
| A_23_P94703   | TOR1B          | -3.0836337 | 0.001128962 |
| A_21_P0011933 | LOC442028      | -3.087673  | 7.34E-04    |
| A_33_P3315719 | PLEKHH2        | -3.0949783 | 0.001369328 |
| A_33_P3229107 | MIR205HG       | -3.095541  | 0.00107585  |
| A_33_P3290443 | SCARNA9        | -3.1017962 | 9.32E-04    |
| A_21_P0013514 | XLOC_I2_014504 | -3.118028  | 0.001303449 |
| A_23_P38346   | DHX58          | -3.12657   | 8.19E-04    |
| A_23_P398566  | NR4A3          | -3.128605  | 7.12E-04    |
| A_23_P67785   | SPAG16         | -3.1316016 | 7.26E-04    |
| A_21_P0013475 |                | -3.139935  | 7.93E-04    |
| A_24_P941167  | APOL6          | -3.1433396 | 6.12E-04    |
| A_23_P105012  | HRASLS2        | -3.146403  | 7.21E-04    |
| A_33_P3327108 | NLK            | -3.1467524 | 0.001850743 |
| A_21_P0012551 |                | -3.1491387 | 7.19E-04    |
| A_33_P3356910 | TCEAL6         | -3.149284  | 7.94E-04    |
| A_23_P421306  | SYT12          | -3.1533544 | 0.001270575 |
| A_33_P3408757 | FOXO6          | -3.1576872 | 0.001010253 |
| A_23_P103104  | MFNG           | -3.1698334 | 9.47E-04    |
| A_23_P169437  | LCN2           | -3.1763377 | 6.84E-04    |
| A_23_P43763   | PLLP           | -3.1764495 | 0.01691517  |
| A_33_P3248794 | NAB2           | -3.1967797 | 6.09E-04    |
| A_23_P71148   | BLVRA          | -3.197458  | 6.09E-04    |
| A_24_P673786  | PIP4K2A        | -3.2015696 | 9.94E-04    |
| A_23_P35645   | RBM17          | -3.215803  | 8.39E-04    |
| A_24_P66001   | UQCR10         | -3.2202232 | 6.19E-04    |
| A_23_P64828   | OAS1           | -3.2223868 | 0.001005329 |
| A_33_P3336686 | CLIC3          | -3.2292397 | 9.64E-04    |
| A_24_P175176  | PHTF2          | -3.2321255 | 0.008853568 |
| A_33_P3315320 | CNTD1          | -3.2409792 | 0.00326139  |
| A_33_P3330911 | BCAS1          | -3.2459378 | 0.001220207 |
| A_33_P3380523 | PRTFDC1        | -3.2460754 | 0.004157415 |
| A_23_P307536  | SH3D21         | -3.2467644 | 9.17E-04    |

|                |             |            |             |
|----------------|-------------|------------|-------------|
| A_23_P388433   | C4orf3      | -3.2572405 | 8.52E-04    |
| A_23_P259692   | PSAT1       | -3.2709515 | 0.001637809 |
| A_23_P101407   | C3          | -3.2768428 | 0.001082468 |
| A_23_P380318   | EGR4        | -3.2860537 | 5.57E-04    |
| A_23_P146456   | CTSV        | -3.288896  | 6.81E-04    |
| A_33_P3295358  | ANGPTL4     | -3.293526  | 5.51E-04    |
| A_32_P416161   | XKRX        | -3.3090918 | 0.021359062 |
| A_33_P3278362  | ANKRD2      | -3.3145251 | 0.001163464 |
| A_23_P386320   | MF12        | -3.3261728 | 0.002596486 |
| A_24_P822704   | TMEM198     | -3.3311005 | 0.001448941 |
| A_33_P3321034  | PLXNA4      | -3.344593  | 0.010312194 |
| A_23_P333218   | ERGIC1      | -3.3456433 | 5.09E-04    |
| A_23_P17663    | MX1         | -3.3542967 | 6.73E-04    |
| A_32_P41065    | TMCC1       | -3.3665142 | 9.32E-04    |
| A_23_P107775   | TMEM190     | -3.3678718 | 0.003554116 |
| A_23_P85693    | GBP2        | -3.370017  | 5.87E-04    |
| A_21_P0000351  | SCARNA22    | -3.3868916 | 0.00177823  |
| A_24_P413941   | C2orf69     | -3.3937333 | 7.88E-04    |
| A_33_P3363425  | FRMD3       | -3.4305859 | 4.91E-04    |
| A_23_P88351    | ATL1        | -3.4407537 | 0.003311631 |
| A_21_P0013512  |             | -3.4497871 | 0.002096286 |
| A_33_P3266828  | TMEM8B      | -3.4644296 | 5.16E-04    |
| A_23_P47704    | UCP2        | -3.4692445 | 8.68E-04    |
| A_23_P123672   | TDRD7       | -3.4729495 | 0.001370494 |
| A_24_P301557   | LPIN2       | -3.4746344 | 0.00305387  |
| A_32_P524904   | C11orf86    | -3.4793289 | 0.001146577 |
| A_33_P3315779  | HERC6       | -3.4954371 | 0.019949904 |
| A_23_P98631    | HPS5        | -3.4998686 | 6.68E-04    |
| A_33_P3378514  | PDE5A       | -3.503786  | 6.04E-04    |
| A_23_P62890    | GBP1        | -3.5053468 | 0.001439089 |
| A_19_P00321671 | Inc-MMRN1-2 | -3.509635  | 0.038597982 |
| A_23_P430902   | MORN4       | -3.5210931 | 0.001034107 |
| A_24_P53282    | CPD         | -3.523147  | 7.98E-04    |
| A_24_P238499   | TYMSOS      | -3.5298846 | 6.07E-04    |
| A_24_P933418   | ABI2        | -3.5355103 | 6.67E-04    |
| A_23_P252541   | RAB7B       | -3.5359006 | 0.001201407 |
| A_32_P192545   | TCEAL6      | -3.545403  | 4.90E-04    |
| A_33_P3408918  | SAA2        | -3.5473945 | 0.001842779 |
| A_32_P18470    | TCEAL5      | -3.5476015 | 0.001456515 |
| A_23_P6771     | LMCD1       | -3.5566945 | 5.73E-04    |
| A_23_P32404    | ISG20       | -3.5625465 | 6.34E-04    |
| A_23_P69383    | PARP9       | -3.5822601 | 5.68E-04    |
| A_33_P3416414  |             | -3.6104832 | 0.002195468 |
| A_23_P82047    | STXBP5      | -3.6236997 | 0.001551095 |
| A_23_P152838   | CCL5        | -3.6474864 | 8.76E-04    |
| A_23_P404494   | IL7R        | -3.6484177 | 4.02E-04    |
| A_32_P452655   | LGALS9C     | -3.6488428 | 4.90E-04    |
| A_33_P3384462  | THSD4       | -3.6518886 | 6.02E-04    |
| A_23_P38537    | KRT16       | -3.6547258 | 5.72E-04    |
| A_33_P3243887  | IL11        | -3.6561332 | 5.82E-04    |
| A_33_P3223495  |             | -3.6707382 | 4.93E-04    |
| A_24_P45446    | GBP4        | -3.6789339 | 3.94E-04    |
| A_23_P146417   | TMEM245     | -3.6794415 | 4.83E-04    |
| A_23_P23346    | MLLT11      | -3.6847184 | 8.50E-04    |
| A_32_P166693   | HEG1        | -3.6910074 | 0.004687741 |
| A_23_P87013    | TAGLN       | -3.7052066 | 0.002759304 |
| A_33_P3219596  | LINC00925   | -3.7078571 | 5.71E-04    |
| A_21_P0011517  | KRT14       | -3.7097156 | 0.001720863 |
| A_23_P75786    | SLC15A3     | -3.7413273 | 8.91E-04    |
| A_23_P142918   | C2orf69     | -3.8013065 | 0.001805462 |
| A_24_P882732   |             | -3.8217678 | 4.26E-04    |
| A_23_P104318   | DDIT4       | -3.823902  | 5.08E-04    |
| A_23_P116557   | LGALS9      | -3.8248272 | 7.05E-04    |

|                |               |            |             |
|----------------|---------------|------------|-------------|
| A_32_P76627    |               | -3.8305404 | 0.001014943 |
| A_24_P382319   | CEACAM1       | -3.854888  | 6.65E-04    |
| A_21_P0000479  | SNORA11D      | -3.8710442 | 5.93E-04    |
| A_23_P202720   | SLC35C1       | -3.8754096 | 3.76E-04    |
| A_19_P00317815 | LOC101927934  | -3.8895836 | 0.005338546 |
| A_23_P106675   | PLCG2         | -3.9007113 | 4.64E-04    |
| A_21_P0005651  |               | -3.9224954 | 0.020726396 |
| A_33_P3209229  | RAB26         | -3.949619  | 3.52E-04    |
| A_23_P96158    | KRT17         | -3.95526   | 7.69E-04    |
| A_23_P58266    | S100P         | -3.9564445 | 5.40E-04    |
| A_24_P228611   | FER1L4        | -3.9703703 | 0.00298979  |
| A_21_P0011578  |               | -4.009164  | 4.41E-04    |
| A_33_P3237977  | LARP6         | -4.0166416 | 4.15E-04    |
| A_33_P3215640  | PI16          | -4.0284085 | 4.83E-04    |
| A_33_P3406072  | FRMD3         | -4.043311  | 0.003013872 |
| A_21_P0007217  | Inc-LGALS12-2 | -4.061233  | 0.002753245 |
| A_33_P3283611  | IFIT3         | -4.0851607 | 3.16E-04    |
| A_33_P3239954  | USP14         | -4.102555  | 0.001569971 |
| A_23_P139500   | BHLHE41       | -4.103315  | 6.04E-04    |
| A_24_P274270   | STAT1         | -4.1144314 | 4.53E-04    |
| A_24_P240259   | LRRRC31       | -4.115681  | 3.51E-04    |
| A_24_P11061    | CSAG1         | -4.121627  | 5.79E-04    |
| A_24_P346101   | PRELID2       | -4.1545863 | 3.38E-04    |
| A_24_P887857   |               | -4.1715727 | 4.07E-04    |
| A_23_P132515   | SIDT1         | -4.1784153 | 0.04344236  |
| A_23_P431388   | SPOCD1        | -4.195264  | 3.55E-04    |
| A_21_P0008670  | LINC00925     | -4.1978793 | 0.001741401 |
| A_33_P3348164  | TTL7          | -4.2090974 | 6.25E-04    |
| A_24_P220485   | OLFML2A       | -4.22765   | 0.005408548 |
| A_24_P322771   | TFF1          | -4.267451  | 3.78E-04    |
| A_23_P41114    | CSTA          | -4.3135757 | 0.006955415 |
| A_33_P3857239  | KRT42P        | -4.3399773 | 2.74E-04    |
| A_23_P113237   | CRLF2         | -4.378316  | 0.013888253 |
| A_33_P3306983  | C11orf31      | -4.3825293 | 3.46E-04    |
| A_23_P42353    | ETV7          | -4.395603  | 0.022561993 |
| A_32_P62963    | KRT16P2       | -4.403206  | 3.45E-04    |
| A_23_P23947    | MAP3K8        | -4.4118757 | 0.049031716 |
| A_23_P340318   | C11orf31      | -4.477005  | 0.00113765  |
| A_23_P64611    | P2RY6         | -4.494579  | 0.004333936 |
| A_24_P567298   |               | -4.5076036 | 0.00123198  |
| A_23_P12343    | GSTM3         | -4.508561  | 3.60E-04    |
| A_33_P3345534  | KRT14         | -4.527597  | 0.001013996 |
| A_23_P202658   | GSTP1         | -4.5299377 | 2.91E-04    |
| A_23_P87011    | TAGLN         | -4.547944  | 5.23E-04    |
| A_23_P60130    | MAL2          | -4.5716515 | 5.01E-04    |
| A_23_P74799    | SLC25A24      | -4.592331  | 3.19E-04    |
| A_33_P3269924  | HIP1R         | -4.619397  | 2.54E-04    |
| A_33_P3372910  | DDX58         | -4.626783  | 2.55E-04    |
| A_33_P3354451  | TRIM31        | -4.6537995 | 5.26E-04    |
| A_33_P3304172  | MUC6          | -4.7363405 | 0.028403768 |
| A_23_P145874   | SAMD9L        | -4.7513313 | 2.30E-04    |
| A_23_P85783    | PHGDH         | -4.8102612 | 4.71E-04    |
| A_23_P25868    | NAA30         | -4.822734  | 2.11E-04    |
| A_33_P3264846  | SAMD9L        | -4.85777   | 2.40E-04    |
| A_32_P105549   | ANXA8L1       | -4.860423  | 2.43E-04    |
| A_23_P23048    | S100A9        | -4.88148   | 0.005113259 |
| A_21_P0012601  | Inc-MMRN1-2   | -4.9339676 | 4.07E-04    |
| A_23_P819      | ISG15         | -4.9537516 | 3.54E-04    |
| A_23_P45871    | IFI44L        | -4.980685  | 2.43E-04    |
| A_24_P111996   | HFE           | -5.041593  | 2.87E-04    |
| A_24_P236799   | RAB31         | -5.070511  | 4.26E-04    |
| A_24_P146683   | MSMB          | -5.126778  | 5.82E-04    |
| A_23_P1962     | RARRES3       | -5.1863785 | 2.63E-04    |

|               |              |            |             |
|---------------|--------------|------------|-------------|
| A_33_P3418170 | DDX58        | -5.244879  | 2.83E-04    |
| A_23_P415021  | METTL7A      | -5.2795553 | 1.86E-04    |
| A_23_P71480   | DEFB1        | -5.441025  | 2.56E-04    |
| A_23_P210554  | SPATA2       | -5.516813  | 4.79E-04    |
| A_23_P41470   | DDX60        | -5.6164594 | 1.88E-04    |
| A_23_P105794  | EPSTI1       | -5.6367702 | 2.41E-04    |
| A_21_P0000310 | SNORA12      | -5.671422  | 0.005590105 |
| A_23_P344421  | ROBO4        | -5.6825824 | 1.85E-04    |
| A_33_P3269723 | ZSWIM7       | -5.713958  | 0.001918953 |
| A_23_P139786  | OASL         | -5.71754   | 1.82E-04    |
| A_23_P110196  | HERC5        | -5.8465447 | 1.64E-04    |
| A_23_P254507  | HOPX         | -5.900045  | 0.005021634 |
| A_23_P207564  | CCL4L2       | -5.9560556 | 0.022537807 |
| A_23_P204782  | MDM1         | -6.3432384 | 0.020106312 |
| A_33_P3376971 | CHAC1        | -6.3481274 | 2.63E-04    |
| A_23_P337800  | IFNL1        | -6.348483  | 3.05E-04    |
| A_33_P3268622 | LY6D         | -6.368071  | 5.64E-04    |
| A_23_P57364   | TFF2         | -6.382899  | 1.86E-04    |
| A_33_P3376965 | CHAC1        | -6.4491024 | 6.37E-04    |
| A_23_P324754  | CEMIP        | -6.476768  | 3.82E-04    |
| A_21_P0002779 | TM4SF1-AS1   | -6.4824886 | 0.035774566 |
| A_33_P3419988 |              | -6.4910836 | 0.017306907 |
| A_24_P28722   | RSAD2        | -6.4992404 | 1.13E-04    |
| A_23_P39955   | ACTG2        | -6.5228825 | 0.013829938 |
| A_23_P307544  | PLXNA2       | -6.551103  | 1.18E-04    |
| A_23_P104199  | ITGB1        | -6.592889  | 1.86E-04    |
| A_21_P0014466 | LOC101928152 | -6.6245875 | 1.14E-04    |
| A_23_P19663   | CTGF         | -6.688004  | 0.001198801 |
| A_23_P143713  | AOBEC3G      | -6.892527  | 6.28E-04    |
| A_23_P56356   | PLB1         | -7.005197  | 1.08E-04    |
| A_23_P94186   | LYPD2        | -7.1444798 | 0.007460184 |
| A_23_P201376  | SSX2IP       | -7.226971  | 1.00E-04    |
| A_33_P3339865 | CALML5       | -7.6100807 | 1.03E-04    |
| A_23_P52266   | IFIT1        | -7.690957  | 9.57E-05    |
| A_21_P0006537 |              | -7.78396   | 9.62E-05    |
| A_23_P95790   | ITLN1        | -7.8084974 | 0.005018879 |
| A_23_P166797  | RTP4         | -8.412615  | 1.32E-04    |
| A_33_P3259203 | TMEM255B     | -8.522111  | 0.007456157 |
| A_33_P3535175 |              | -8.566684  | 0.001722696 |
| A_33_P3225522 | OAS2         | -8.639452  | 2.68E-04    |
| A_33_P3354607 | CCL4L2       | -8.725195  | 8.99E-04    |
| A_23_P156327  | TGFB1        | -8.844732  | 7.09E-05    |
| A_21_P0014514 |              | -9.418101  | 0.001937676 |
| A_21_P0013865 | LOC102725299 | -9.95734   | 9.73E-05    |
| A_24_P102650  | MUC5B        | -10.704958 | 1.69E-04    |
| A_33_P3423941 | IFITM1       | -11.446535 | 3.03E-04    |
| A_33_P3225512 | OAS2         | -11.777884 | 8.85E-05    |
| A_23_P72737   | IFITM1       | -14.079743 | 4.32E-05    |
| A_21_P0002780 | TM4SF1-AS1   | -14.11726  | 1.16E-04    |
| A_24_P557479  | XAF1         | -14.976566 | 2.97E-04    |
| A_23_P39465   | BST2         | -16.492905 | 3.03E-05    |
| A_33_P3220911 | BST2         | -17.992977 | 6.20E-05    |
| A_23_P204087  | OAS2         | -22.569792 | 6.25E-05    |
| A_24_P270460  | IFI27        | -23.609858 | 3.92E-05    |
| A_23_P201459  | IFI6         | -23.966183 | 1.90E-05    |
| A_23_P6263    | MX2          | -66.47237  | 9.81E-06    |

---

Supplementary Table S7. Proteins identified with ChIRP-MS

| Accession | Description                                                                                   | Sum PEP<br>Score | Coverage #<br>[%] | # Peptides | # PSMs | # Unique<br>Peptides | Score<br>Mascot | Score<br>Sequest HT |
|-----------|-----------------------------------------------------------------------------------------------|------------------|-------------------|------------|--------|----------------------|-----------------|---------------------|
| P04908    | histone H2A type 1-B/E [OS=Homo sapiens]                                                      | 36.025           | 38                | 6          | 166    | 2                    | 1421            | 211.14              |
| P07900    | Heat shock protein HSP 90-alpha [OS=Homo sapiens]                                             | 23.28            | 11                | 7          | 90     | 2                    | 851             | 78.61               |
| Q92945    | Far upstream element-binding protein 2 [OS=Homo sapiens]                                      | 18.314           | 8                 | 5          | 52     | 4                    | 531             | 69.86               |
| P36551    | Oxygen-dependent coproporphyrinogen-III oxidase, mitochondrial [OS=Homo sapiens]              | 17.873           | 13                | 4          | 18     | 4                    | 55              | 25.69               |
| Q7RTS7    | Keratin, type II cytoskeletal 74 [OS=Homo sapiens]                                            | 17.285           | 4                 | 4          | 46     | 1                    | 295             | 47.6                |
| Q99832    | T-complex protein 1 subunit eta [OS=Homo sapiens]                                             | 17.06            | 12                | 5          | 32     | 5                    | 344             | 29.11               |
| P23396-1  | 40S ribosomal protein S3 [OS=Homo sapiens]                                                    | 16.962           | 22                | 5          | 38     | 5                    | 282             | 44.45               |
| P62249    | 40S ribosomal protein S16 [OS=Homo sapiens]                                                   | 16.627           | 32                | 6          | 28     | 6                    | 415             | 23.56               |
| P46783    | 40S ribosomal protein S10 [OS=Homo sapiens]                                                   | 16.433           | 21                | 3          | 30     | 3                    | 470             | 41.18               |
| P07737    | profilin-1 [OS=Homo sapiens]                                                                  | 16.138           | 30                | 4          | 42     | 4                    | 638             | 72.24               |
| P52597    | Heterogeneous nuclear ribonucleoprotein F [OS=Homo sapiens]                                   | 14.133           | 6                 | 2          | 18     | 2                    | 226             | 31.96               |
| P63104-1  | 14-3-3 protein zeta/delta [OS=Homo sapiens]                                                   | 13.658           | 11                | 3          | 47     | 1                    | 499             | 42.5                |
| P26583    | High mobility group protein B2 [OS=Homo sapiens]                                              | 12.861           | 13                | 3          | 30     | 1                    | 265             | 36.14               |
| P63244    | Receptor of activated protein C kinase 1 [OS=Homo sapiens]                                    | 12.096           | 12                | 4          | 24     | 4                    | 136             | 30.17               |
| P67809    | Nuclease-sensitive element-binding protein 1 [OS=Homo sapiens]                                | 12.074           | 8                 | 3          | 67     | 3                    | 518             | 57.08               |
| P07951-1  | Tropomyosin beta chain [OS=Homo sapiens]                                                      | 12.057           | 13                | 3          | 32     | 1                    | 339             | 38.81               |
| P23526-1  | Adenosylhomocysteinase [OS=Homo sapiens]                                                      | 12.012           | 11                | 4          | 19     | 4                    | 185             | 23.37               |
| Q13263    | Transcription intermediary factor 1-beta [OS=Homo sapiens]                                    | 11.677           | 5                 | 2          | 4      | 2                    | 51              | 2.56                |
| Q562R1    | Beta-actin-like protein 2 [OS=Homo sapiens]                                                   | 10.831           | 16                | 5          | 32     | 1                    | 178             | 20.75               |
| O14979-1  | Heterogeneous nuclear ribonucleoprotein D-like [OS=Homo sapiens]                              | 10.828           | 10                | 5          | 26     | 2                    | 162             | 21.84               |
| P0C0S5    | Histone H2A.Z [OS=Homo sapiens]                                                               | 10.112           | 23                | 3          | 112    | 1                    | 877             | 107.76              |
| Q92841    | Probable ATP-dependent RNA helicase DDX17 [OS=Homo sapiens]                                   | 9.935            | 4                 | 3          | 12     | 2                    | 188             | 20.25               |
| P07195    | L-lactate dehydrogenase B chain [OS=Homo sapiens]                                             | 9.867            | 13                | 4          | 18     | 2                    | 176             | 17.45               |
| P00338-1  | L-lactate dehydrogenase A chain [OS=Homo sapiens]                                             | 9.832            | 11                | 4          | 18     | 2                    | 124             | 14.65               |
| Q9HB71    | Calcyclin-binding protein [OS=Homo sapiens]                                                   | 9.789            | 11                | 2          | 22     | 2                    | 388             | 3.35                |
| P49368-1  | T-complex protein 1 subunit gamma [OS=Homo sapiens]                                           | 9.395            | 7                 | 3          | 22     | 3                    | 373             | 31.2                |
| P04083    | annexin A1 [OS=Homo sapiens]                                                                  | 9.322            | 12                | 3          | 14     | 3                    | 129             | 16.74               |
| Q15654-1  | thyroid receptor-interacting protein 6 [OS=Homo sapiens]                                      | 8.906            | 4                 | 1          | 8      | 1                    | 74              | 16.35               |
| P50990    | T-complex protein 1 subunit theta [OS=Homo sapiens]                                           | 8.22             | 4                 | 2          | 18     | 2                    | 256             | 26.43               |
| P78371-1  | T-complex protein 1 subunit beta [OS=Homo sapiens]                                            | 7.913            | 4                 | 2          | 13     | 2                    | 136             | 8                   |
| P46781    | 40S ribosomal protein S9 [OS=Homo sapiens]                                                    | 7.904            | 24                | 4          | 31     | 4                    | 250             | 27.2                |
| P15880    | 40S ribosomal protein S2 [OS=Homo sapiens]                                                    | 7.258            | 12                | 3          | 28     | 3                    | 192             | 32.98               |
| P42704    | Leucine-rich PPR motif-containing protein, mitochondrial [OS=Homo sapiens]                    | 7.156            | 2                 | 2          | 4      | 2                    | 51              | 5.8                 |
| P62701    | 40S ribosomal protein S4, X isoform [OS=Homo sapiens]                                         | 7.128            | 13                | 3          | 17     | 3                    | 153             | 17.09               |
| P62258-1  | 14-3-3 protein epsilon [OS=Homo sapiens]                                                      | 7.041            | 5                 | 2          | 35     | 1                    | 164             | 22.93               |
| Q13838-1  | spliceosome RNA helicase DDX39B [OS=Homo sapiens]                                             | 7.025            | 6                 | 3          | 8      | 3                    | 89              | 5.06                |
| Q9UN86    | Ras GTPase-activating protein-binding protein 2 [OS=Homo sapiens]                             | 6.993            | 6                 | 2          | 13     | 1                    | 40              | 2.46                |
| P18124    | 60S ribosomal protein L7 [OS=Homo sapiens]                                                    | 6.914            | 10                | 3          | 15     | 3                    | 116             | 17.16               |
| P17987    | T-complex protein 1 subunit alpha [OS=Homo sapiens]                                           | 6.893            | 5                 | 3          | 12     | 3                    | 104             | 15.53               |
| P62913    | 60S ribosomal protein L11 [OS=Homo sapiens]                                                   | 6.659            | 15                | 2          | 14     | 2                    | 187             | 15.16               |
| P63173    | 60s ribosomal protein l38 [OS=Homo sapiens]                                                   | 6.591            | 19                | 1          | 6      | 1                    | 100             | 10.3                |
| P52292    | Importin subunit alpha-1 [OS=Homo sapiens]                                                    | 6.23             | 4                 | 2          | 10     | 2                    | 227             | 0                   |
| Q01130    | serine/arginine-rich splicing factor 2 [OS=Homo sapiens]                                      | 6.135            | 8                 | 3          | 32     | 3                    | 396             | 38.66               |
| P11021    | 78 kDa glucose-regulated protein [OS=Homo sapiens]                                            | 6.087            | 4                 | 2          | 12     | 1                    | 142             | 17.17               |
| Q08211    | Atp-dependent rna helicase a [OS=Homo sapiens]                                                | 6.038            | 3                 | 3          | 12     | 3                    | 80              | 9.26                |
| P62857    | 40S ribosomal protein S28 [OS=Homo sapiens]                                                   | 5.929            | 28                | 1          | 6      | 1                    | 46              | 9.87                |
| P08708    | 40S ribosomal protein S17 [OS=Homo sapiens]                                                   | 5.806            | 9                 | 2          | 6      | 2                    | 47              | 2.53                |
| P62316    | Small nuclear ribonucleoprotein Sm D2 [OS=Homo sapiens]                                       | 5.769            | 14                | 1          | 6      | 1                    | 45              | 12.26               |
| Q75494-1  | Serine/arginine-rich splicing factor 10 [OS=Homo sapiens]                                     | 5.742            | 5                 | 1          | 14     | 1                    | 162             | 20.72               |
| Q15366-1  | Poly(rC)-binding protein 2 [OS=Homo sapiens]                                                  | 5.692            | 7                 | 2          | 24     | 2                    | 334             | 29.38               |
| P17844    | probable ATP-dependent RNA helicase DDX5 [OS=Homo sapiens]                                    | 5.383            | 4                 | 3          | 6      | 2                    | 31              | 4.71                |
| Q07666    | KH domain-containing, RNA-binding, signal transduction-associated protein 1 [OS=Homo sapiens] | 5.333            | 4                 | 2          | 12     | 2                    | 58              | 10.95               |
| P35268    | 60S ribosomal protein L22 [OS=Homo sapiens]                                                   | 5.248            | 20                | 2          | 6      | 2                    | 28              | 7.36                |
| P99999    | cytochrome c [OS=Homo sapiens]                                                                | 5.105            | 18                | 2          | 4      | 2                    | 35              | 2.13                |
| P40227-1  | T-complex protein 1 subunit zeta [OS=Homo sapiens]                                            | 5.087            | 2                 | 2          | 6      | 2                    | 51              | 6.09                |
| Q13347    | Eukaryotic translation initiation factor 3 subunit I [OS=Homo sapiens]                        | 5.074            | 4                 | 1          | 2      | 1                    | 42              | 4.39                |
| Q43169    | Cytochrome b5 type B [OS=Homo sapiens]                                                        | 5.007            | 9                 | 1          | 2      | 1                    | 52              | 4.21                |
| O00422    | Histone deacetylase complex subunit SAP18 [OS=Homo sapiens]                                   | 4.988            | 12                | 2          | 6      | 2                    | 27              | 5.17                |
| P26599    | Polypyrimidine tract-binding protein 1 [OS=Homo sapiens]                                      | 4.982            | 7                 | 2          | 4      | 2                    | 54              | 6.69                |
| Q04837    | Single-stranded DNA-binding protein, mitochondrial [OS=Homo sapiens]                          | 4.883            | 7                 | 1          | 8      | 1                    | 60              | 12.34               |
| P84090    | Enhancer of rudimentary homolog [OS=Homo sapiens]                                             | 4.681            | 15                | 1          | 8      | 1                    | 130             |                     |
| Q9Y2W1    | Thyroid hormone receptor-associated protein 3 [OS=Homo sapiens]                               | 4.627            | 3                 | 3          | 13     | 3                    | 19              | 13.17               |
| P15407    | Fos-related antigen 1 [OS=Homo sapiens]                                                       | 4.577            | 5                 | 1          | 4      | 1                    | 17              | 2.37                |
| Q9NYF8-1  | Bcl-2-associated transcription factor 1 [OS=Homo sapiens]                                     | 4.57             | 2                 | 2          | 3      | 2                    | 44              | 2.8                 |
| O43707    | Alpha-actinin-4 [OS=Homo sapiens]                                                             | 4.545            | 1                 | 1          | 4      | 1                    | 81              | 6.29                |
| P08621-1  | U1 small nuclear ribonucleoprotein 70 kDa [OS=Homo sapiens]                                   | 4.434            | 2                 | 1          | 8      | 1                    | 48              | 9.41                |
| O75937    | DnaJ homolog subfamily C member 8 [OS=Homo sapiens]                                           | 4.427            | 8                 | 1          | 2      | 1                    | 0               | 0                   |
| O75152    | Zinc finger CCH domain-containing protein 11A [OS=Homo sapiens]                               | 4.427            | 3                 | 1          | 6      | 1                    | 70              | 2.82                |
| Q8WWI1    | LIM domain only protein 7 [OS=Homo sapiens]                                                   | 4.366            | 2                 | 2          | 17     | 2                    | 231             | 23.86               |
| P49773    | Histidine triad nucleotide-binding protein 1 [OS=Homo sapiens]                                | 4.232            | 11                | 1          | 6      | 1                    | 21              | 5.39                |
| P12270    | Nucleoprotein TPR [OS=Homo sapiens]                                                           | 4.214            | 1                 | 2          | 7      | 2                    | 39              | 0                   |

|          |                                                                                |       |    |   |   |   |     |      |
|----------|--------------------------------------------------------------------------------|-------|----|---|---|---|-----|------|
| P62910   | 60S ribosomal protein L32 [OS=Homo sapiens]                                    | 4.193 | 10 | 1 | 6 | 1 | 102 | 9.29 |
| Q15424-1 | Scaffold attachment factor B1 [OS=Homo sapiens]                                | 4.009 | 1  | 1 | 2 | 1 | 41  | 2.98 |
| Q13404   | Ubiquitin-conjugating enzyme E2 variant 1 [OS=Homo sapiens]                    | 3.967 | 8  | 1 | 4 | 1 | 97  |      |
| Q9Y3Y2   | Chromatin target of PRMT1 protein [OS=Homo sapiens]                            | 3.96  | 5  | 1 | 2 | 1 | 57  | 3.42 |
| Q9Y266   | nuclear migration protein nudC [OS=Homo sapiens]                               | 3.938 | 5  | 1 | 6 | 1 | 48  | 9.53 |
| Q9UQ35   | serine/arginine repetitive matrix protein 2 [OS=Homo sapiens]                  | 3.899 | 1  | 2 | 9 | 2 | 35  | 5.31 |
| P40926   | Malate dehydrogenase, mitochondrial [OS=Homo sapiens]                          | 3.887 | 7  | 1 | 2 | 1 | 23  | 2.53 |
| P25398   | 40S ribosomal protein S12 [OS=Homo sapiens]                                    | 3.877 | 8  | 1 | 6 | 1 | 71  | 6.97 |
| Q99623   | Prohibitin-2 [OS=Homo sapiens]                                                 | 3.733 | 4  | 1 | 6 | 1 | 74  | 3.94 |
| P62263   | 40S ribosomal protein S14 [OS=Homo sapiens]                                    | 3.681 | 9  | 1 | 2 | 1 | 37  | 2.83 |
| P04792   | Heat shock protein beta-1 [OS=Homo sapiens]                                    | 3.633 | 5  | 1 | 6 | 1 | 94  | 8.01 |
| P31153   | S-adenosylmethionine synthase isoform type-2 [OS=Homo sapiens]                 | 3.628 | 7  | 2 | 4 | 2 | 27  | 2.44 |
| P30101   | Protein disulfide-isomerase A3 [OS=Homo sapiens]                               | 3.566 | 2  | 1 | 8 | 1 | 125 | 9.93 |
| P62906   | 60S ribosomal protein L10A [OS=Homo sapiens]                                   | 3.558 | 6  | 1 | 3 | 1 | 20  | 5.04 |
| P62333   | 26S proteasome regulatory subunit 10B [OS=Homo sapiens]                        | 3.353 | 4  | 1 | 2 | 1 | 0   | 3.45 |
| Q86U42-1 | polyadenylate-binding protein 2 [OS=Homo sapiens]                              | 3.331 | 7  | 1 | 2 | 1 | 0   |      |
| P50914   | 60S ribosomal protein L14 [OS=Homo sapiens]                                    | 3.208 | 6  | 1 | 6 | 1 | 0   | 7.6  |
| Q16881-1 | Thioredoxin reductase 1, cytoplasmic [OS=Homo sapiens]                         | 3.198 | 2  | 1 | 6 | 1 | 33  | 7.93 |
| P48643   | T-complex protein 1 subunit epsilon [OS=Homo sapiens]                          | 3.176 | 2  | 1 | 4 | 1 | 84  | 5.77 |
| P84098   | 60S ribosomal protein L19 [OS=Homo sapiens]                                    | 3.168 | 5  | 1 | 4 | 1 | 55  | 6.58 |
| P50991   | T-complex protein 1 subunit delta [OS=Homo sapiens]                            | 3.097 | 3  | 2 | 8 | 2 | 29  | 5.38 |
| Q9Y3U8   | 60S ribosomal protein L36 [OS=Homo sapiens]                                    | 3.07  | 30 | 2 | 6 | 2 | 21  | 5.78 |
| P22234   | multifunctional protein ADE2 [OS=Homo sapiens]                                 | 3.021 | 3  | 1 | 5 | 1 | 88  |      |
| P35232   | Prohibitin [OS=Homo sapiens]                                                   | 2.973 | 4  | 1 | 4 | 1 | 0   | 2.33 |
| P29401   | Transketolase [OS=Homo sapiens]                                                | 2.969 | 2  | 1 | 6 | 1 | 100 | 7.52 |
| Q01081   | Splicing factor U2AF 35 kDa subunit [OS=Homo sapiens]                          | 2.936 | 6  | 1 | 2 | 1 | 38  | 3.27 |
| Q13185   | chromobox protein homolog 3 [OS=Homo sapiens]                                  | 2.91  | 8  | 1 | 4 | 1 | 0   | 5.24 |
| P61353   | 60S ribosomal protein L27 [OS=Homo sapiens]                                    | 2.8   | 6  | 1 | 4 | 1 | 70  | 3.53 |
| P23588   | eukaryotic translation initiation factor 4B [OS=Homo sapiens]                  | 2.747 | 3  | 2 | 8 | 2 | 13  | 7.49 |
| P00505   | Aspartate aminotransferase, mitochondrial [OS=Homo sapiens]                    | 2.604 | 2  | 1 | 6 | 1 | 49  | 1.66 |
| P43686   | 26S proteasome regulatory subunit 6B [OS=Homo sapiens]                         | 2.555 | 3  | 1 | 6 | 1 | 0   | 7.85 |
| Q8WXF1   | Paraspeckle component 1 [OS=Homo sapiens]                                      | 2.451 | 2  | 1 | 4 | 1 | 19  | 6.23 |
| O15143   | Actin-related protein 2/3 complex subunit 1B [OS=Homo sapiens]                 | 2.435 | 3  | 1 | 4 | 1 | 50  | 4.85 |
| O75821   | Eukaryotic translation initiation factor 3 subunit G [OS=Homo sapiens]         | 2.385 | 3  | 1 | 2 | 1 | 25  | 2.19 |
| P20700   | Lamin-B1 [OS=Homo sapiens]                                                     | 2.35  | 2  | 1 | 4 | 1 | 29  | 4.5  |
| P30838   | Aldehyde dehydrogenase, dimeric NADP-preferring [OS=Homo sapiens]              | 2.24  | 3  | 1 | 2 | 1 | 36  | 1.71 |
| Q7KZF4   | staphylococcal nuclease domain-containing protein 1 [OS=Homo sapiens]          | 2.223 | 1  | 1 | 2 | 1 | 27  | 1.99 |
| Q9GZT3-1 | SRA stem-loop-interacting RNA-binding protein, mitochondrial [OS=Homo sapiens] | 2.203 | 9  | 1 | 2 | 1 | 20  | 2.44 |
| Q9UMS4   | Pre-mRNA-processing factor 19 [OS=Homo sapiens]                                | 2.182 | 4  | 1 | 4 | 1 | 0   | 2.84 |
| P39019   | 40S ribosomal protein S19 [OS=Homo sapiens]                                    | 2.151 | 14 | 2 | 6 | 2 | 24  | 4.81 |
| Q8N1F7-1 | Nuclear pore complex protein Nup93 [OS=Homo sapiens]                           | 2.142 | 1  | 1 | 2 | 1 | 39  | 3.04 |
| P13010   | X-ray repair cross-complementing protein 5 [OS=Homo sapiens]                   | 2.091 | 1  | 1 | 6 | 1 | 63  | 2.01 |
| P62888   | 60S ribosomal protein L30 [OS=Homo sapiens]                                    | 2.088 | 10 | 1 | 6 | 1 | 110 | 8.72 |
| P55209   | Nucleosome assembly protein 1-like 1 [OS=Homo sapiens]                         | 2.074 | 3  | 1 | 2 | 1 | 17  | 2.22 |
| Q99426   | tubulin-folding cofactor B [OS=Homo sapiens]                                   | 1.999 | 4  | 1 | 2 | 1 | 36  | 2.18 |
| P62633-1 | Cellular nucleic acid-binding protein [OS=Homo sapiens]                        | 1.994 | 7  | 1 | 2 | 1 | 22  | 2.03 |
| P12429   | annexin A3 [OS=Homo sapiens]                                                   | 1.941 | 2  | 1 | 1 | 1 | 22  |      |
| Q14247-1 | Src substrate cortactin [OS=Homo sapiens]                                      | 1.86  | 3  | 1 | 2 | 1 | 17  | 3.4  |
| Q2TAY7   | WD40 repeat-containing protein SMU1 [OS=Homo sapiens]                          | 1.845 | 2  | 1 | 2 | 1 | 15  | 2.22 |
| O75367-1 | Core histone macro-H2A.1 [OS=Homo sapiens]                                     | 1.788 | 2  | 1 | 4 | 1 | 0   | 1.74 |
| Q9NZM1   | Myoferlin [OS=Homo sapiens]                                                    | 1.787 | 1  | 1 | 2 | 1 | 0   | 2.05 |
| P12004   | proliferating cell nuclear antigen [OS=Homo sapiens]                           | 1.784 | 3  | 1 | 2 | 1 | 0   | 1.7  |
| Q15181   | Inorganic pyrophosphatase [OS=Homo sapiens]                                    | 1.775 | 3  | 1 | 6 | 1 | 58  | 6.01 |
| Q13126-1 | S-methyl-5'-thioadenosine phosphorylase [OS=Homo sapiens]                      | 1.723 | 4  | 1 | 2 | 1 | 13  | 2.18 |
| Q13435   | Splicing factor 3b subunit 2 [OS=Homo sapiens]                                 | 1.699 | 1  | 1 | 5 | 1 | 38  | 7.12 |
| Q14004-1 | Cyclin-dependent kinase 13 [OS=Homo sapiens]                                   | 1.671 | 1  | 1 | 1 | 1 |     | 1.72 |
| O00571   | ATP-dependent RNA helicase DDX3X [OS=Homo sapiens]                             | 1.663 | 2  | 1 | 2 | 1 | 28  | 1.81 |
| Q9HAV7   | GrpE protein homolog 1, mitochondrial [OS=Homo sapiens]                        | 1.609 | 5  | 1 | 9 | 1 | 0   | 2.05 |
| O43396   | Thioredoxin-like protein 1 [OS=Homo sapiens]                                   | 1.583 | 2  | 1 | 8 | 1 | 100 | 1.83 |
| Q01469   | Fatty acid-binding protein, epidermal [OS=Homo sapiens]                        | 1.558 | 7  | 1 | 4 | 1 | 31  |      |
| P27816-1 | Microtubule-associated protein 4 [OS=Homo sapiens]                             | 1.55  | 1  | 1 | 2 | 1 | 0   | 1.85 |
| P31150   | Rab GDP dissociation inhibitor alpha [OS=Homo sapiens]                         | 1.49  | 2  | 1 | 2 | 1 | 45  | 0    |
| Q00059   | Transcription factor A, mitochondrial [OS=Homo sapiens]                        | 1.41  | 6  | 1 | 4 | 1 | 0   | 0    |
| Q95644-1 | Nuclear factor of activated T-cells, cytoplasmic 1 [OS=Homo sapiens]           | 1.387 | 1  | 1 | 2 | 1 |     | 4.82 |
| Q9NX63   | MICOS complex subunit MIC19 [OS=Homo sapiens]                                  | 1.21  | 4  | 1 | 2 | 1 | 13  | 0    |
| P61513   | 60S ribosomal protein L37a [OS=Homo sapiens]                                   | 1.118 | 10 | 1 | 1 | 1 |     | 0    |
| Q9Y230   | RuvB-like 2 [OS=Homo sapiens]                                                  | 1.095 | 3  | 1 | 2 | 1 | 0   | 2.1  |
| Q14847   | LIM and SH3 domain protein 1 [OS=Homo sapiens]                                 | 1.037 | 5  | 1 | 4 | 1 | 18  | 8.16 |
| Q15643   | Thyroid receptor-interacting protein 11 [OS=Homo sapiens]                      | 1.023 | 2  | 1 | 4 | 1 |     | 3.56 |
| P32969   | 60S ribosomal protein L9 [OS=Homo sapiens]                                     | 0.998 | 4  | 1 | 3 | 1 | 39  | 0    |
| P11586   | C-1-tetrahydrofolate synthase, cytoplasmic [OS=Homo sapiens]                   | 0.929 | 1  | 1 | 2 | 1 | 35  | 1.89 |
| Q00688   | peptidyl-prolyl cis-trans isomerase FKBP3 [OS=Homo sapiens]                    | 0.927 | 4  | 1 | 2 | 1 | 0   | 0    |



Supplementary Table S8. RNAs identified by ChIRP-RNA-seq analysis

| Gene ID            | Gene name   | Category             |
|--------------------|-------------|----------------------|
| ENSG00000240541.3  | TM4SF1-AS1  | lncRNA               |
| ENSG00000283944.1  | MIR4709     | miRNA                |
| ENSG00000237875.1  | AL353691.1  | processed_pseudogene |
| ENSG00000210191.1  | MT-TL2      | Mt_tRNA              |
| ENSG00000278523.1  | Y_RNA       | misc_RNA             |
| ENSG00000227063.5  | RPL41P1     | processed_pseudogene |
| ENSG00000274197.1  | U4          | snRNA                |
| ENSG00000273744.1  | U4          | snRNA                |
| ENSG00000284541.1  | MIR4517     | miRNA                |
| ENSG00000066044.15 | ELAVL1      | protein_coding       |
| ENSG00000207129.1  | RNA5SP187   | rRNA_pseudogene      |
| ENSG00000207032.1  | Y_RNA       | misc_RNA             |
| ENSG00000276664.1  | AC004542.5  | misc_RNA             |
| ENSG00000235174.1  | RPL39P3     | processed_pseudogene |
| ENSG00000206738.1  | Y_RNA       | misc_RNA             |
| ENSG00000277599.1  | AP000944.2  | misc_RNA             |
| ENSG00000236439.4  | AC099336.2  | processed_pseudogene |
| ENSG00000199332.1  | Y_RNA       | misc_RNA             |
| ENSG00000265724.1  | MIR4284     | miRNA                |
| ENSG00000172428.11 | COPS9       | protein_coding       |
| ENSG00000262526.2  | AC120057.2  | protein_coding       |
| ENSG00000284154.1  | MIR3605     | miRNA                |
| ENSG00000207194.1  | RNU6-1026P  | snRNA                |
| ENSG00000238516.1  | Y_RNA       | misc_RNA             |
| ENSG00000252082.1  | RNU6-547P   | snRNA                |
| ENSG00000202470.1  | Y_RNA       | misc_RNA             |
| ENSG00000199753.1  | SNORD104    | snoRNA               |
| ENSG00000167608.12 | TMC4        | protein_coding       |
| ENSG00000207198.1  | RNU6-1195P  | snRNA                |
| ENSG00000209482.1  | SNORD83A    | snoRNA               |
| ENSG00000206799.1  | SNORA32     | snoRNA               |
| ENSG00000104219.13 | ZDHHC2      | protein_coding       |
| ENSG00000272707.1  | AC046143.2  | lncRNA               |
| ENSG00000252269.1  | RNU4ATAC12P | snRNA                |
| ENSG00000273542.2  | H4C12       | protein_coding       |
| ENSG00000204196.5  | RPL12P16    | processed_pseudogene |
| ENSG00000126790.12 | L3HYPDH     | protein_coding       |
| ENSG00000199301.1  | RNU6-208P   | snRNA                |
| ENSG00000200250.1  | RNU6-1147P  | snRNA                |
| ENSG00000207162.1  | RNU6-549P   | snRNA                |
| ENSG00000143156.14 | NME7        | protein_coding       |
| ENSG00000184939.16 | ZFP90       | protein_coding       |
| ENSG00000275908.1  | AC004381.2  | snRNA                |
| ENSG00000222604.2  | AC007956.1  | snoRNA               |
| ENSG00000226744.1  | AC005326.1  | processed_pseudogene |
| ENSG00000124299.15 | PEPD        | protein_coding       |
| ENSG00000151835.16 | SACS        | protein_coding       |
| ENSG00000271598.1  | AC008739.3  | processed_pseudogene |
| ENSG00000206847.1  | Y_RNA       | misc_RNA             |
| ENSG00000135127.11 | BICDL1      | protein_coding       |
| ENSG00000274760.1  | AL049766.1  | misc_RNA             |
| ENSG00000284038.1  | MIR10A      | miRNA                |
| ENSG00000160606.11 | TLCD1       | protein_coding       |
| ENSG00000206865.1  | Y_RNA       | misc_RNA             |
| ENSG00000201221.1  | RNU4-40P    | snRNA                |

|                    |             |                      |
|--------------------|-------------|----------------------|
| ENSG00000244270.1  | RPL32P29    | processed_pseudogene |
| ENSG00000243621.1  | AC003989.2  | processed_pseudogene |
| ENSG00000206881.1  | RNU6-190P   | snRNA                |
| ENSG00000252283.1  | Vault       | misc_RNA             |
| ENSG00000221264.1  | MIR1284     | miRNA                |
| ENSG00000199551.1  | RNU6-545P   | snRNA                |
| ENSG00000239129.1  | AC104982.1  | snoRNA               |
| ENSG00000251785.1  | RNA5SP20    | rRNA_pseudogene      |
| ENSG00000201900.1  | RNY1P13     | misc_RNA             |
| ENSG00000268836.1  | Z69706.1    | lncRNA               |
| ENSG00000200385.1  | AL136296.1  | snoRNA               |
| ENSG00000278526.1  | AC002542.5  | misc_RNA             |
| ENSG00000254564.1  | AC100767.1  | processed_pseudogene |
| ENSG00000267755.1  | AC005329.2  | lncRNA               |
| ENSG00000206620.1  | SNORD45C    | snoRNA               |
| ENSG00000242612.7  | DECR2       | protein_coding       |
| ENSG00000202119.1  | RNU6-302P   | snRNA                |
| ENSG00000206583.1  | RNU6-1292P  | snRNA                |
| ENSG00000206880.1  | RNU6-1310P  | snRNA                |
| ENSG00000207362.1  | RNU6-422P   | snRNA                |
| ENSG00000156755.10 | IGKV1OR-2   | IG_V_pseudogene      |
| ENSG00000263859.1  | AC145207.6  | lncRNA               |
| ENSG00000100490.9  | CDKL1       | protein_coding       |
| ENSG00000269621.1  | AL589765.7  | lncRNA               |
| ENSG00000231992.1  | AC092802.3  | lncRNA               |
| ENSG00000148444.16 | COMMD3      | protein_coding       |
| ENSG00000277290.1  | AC136475.10 | processed_pseudogene |
| ENSG00000259715.1  | AC022087.1  | lncRNA               |
| ENSG00000284435.1  | MIR4691     | miRNA                |
| ENSG0000033011.13  | ALG1        | protein_coding       |
| ENSG00000201114.1  | Y_RNA       | misc_RNA             |
| ENSG00000184363.10 | PKP3        | protein_coding       |
| ENSG00000259187.1  | AC122108.1  | lncRNA               |
| ENSG00000212664.5  | AC064799.1  | processed_pseudogene |
| ENSG00000283418.1  | U6          | snRNA                |
| ENSG00000230953.2  | AC099677.1  | processed_pseudogene |
| ENSG00000261061.1  | AC092718.4  | lncRNA               |
| ENSG00000253051.1  | SNORA31B    | snoRNA               |
| ENSG00000252824.1  | AC005086.1  | snoRNA               |
| ENSG00000231153.1  | AC002429.1  | processed_pseudogene |
| ENSG00000271870.1  | AC024060.2  | lncRNA               |
| ENSG00000205609.13 | EIF3CL      | protein_coding       |
| ENSG00000270170.2  | NCBP2AS2    | protein_coding       |
| ENSG00000200138.1  | RNY1P10     | misc_RNA             |
| ENSG00000201217.1  | Y_RNA       | misc_RNA             |
| ENSG00000252874.2  | Y_RNA       | misc_RNA             |
| ENSG00000199631.1  | SNORD33     | snoRNA               |
| ENSG00000239602.1  | RPL35AP16   | processed_pseudogene |
| ENSG00000264349.1  | MIR4258     | miRNA                |
| ENSG00000243056.2  | EIF4EBP3    | protein_coding       |
| ENSG00000253048.1  | RNU4-60P    | snRNA                |
| ENSG00000163728.11 | TTC14       | protein_coding       |
| ENSG00000163319.11 | MRPS18C     | protein_coding       |
| ENSG00000103356.18 | EARS2       | protein_coding       |
| ENSG00000137831.15 | UACA        | protein_coding       |
| ENSG00000202498.1  | SNORD116    | snoRNA               |
| ENSG00000206811.1  | SNORA10     | snoRNA               |
| ENSG00000241990.5  | PRR34-AS1   | lncRNA               |

|                    |             |                                    |
|--------------------|-------------|------------------------------------|
| ENSG00000133433.11 | GSTT2B      | protein_coding                     |
| ENSG00000146826.17 | MAP11       | protein_coding                     |
| ENSG00000164978.18 | NUDT2       | protein_coding                     |
| ENSG00000163156.12 | SCNM1       | protein_coding                     |
| ENSG00000166347.19 | CYB5A       | protein_coding                     |
| ENSG00000158716.9  | DUSP23      | protein_coding                     |
| ENSG00000243260.3  | RN7SL558P   | misc_RNA                           |
| ENSG00000206977.1  | AL365205.2  | snoRNA                             |
| ENSG00000212443.1  | SNORA53     | snoRNA                             |
| ENSG00000277184.1  | SNORA9      | snoRNA                             |
| ENSG00000184924.5  | PTRHD1      | protein_coding                     |
| ENSG00000202363.1  | SNORA62     | snoRNA                             |
| ENSG00000079482.13 | OPHN1       | protein_coding                     |
| ENSG00000119203.14 | CPSF3       | protein_coding                     |
| ENSG00000175387.16 | SMAD2       | protein_coding                     |
| ENSG00000025796.14 | SEC63       | protein_coding                     |
| ENSG00000272418.1  | AC090607.4  | lncRNA                             |
| ENSG00000165113.13 | GKAP1       | protein_coding                     |
| ENSG00000169607.13 | CKAP2L      | protein_coding                     |
| ENSG00000286048.1  | AC008966.3  | lncRNA                             |
| ENSG00000179029.15 | TMEM107     | protein_coding                     |
| ENSG00000118922.17 | KLF12       | protein_coding                     |
| ENSG00000253676.1  | TAGLN2P1    | processed_pseudogene               |
| ENSG00000265415.1  | AC099850.3  | lncRNA                             |
| ENSG00000248256.1  | OCIAD1-AS1  | lncRNA                             |
| ENSG00000258917.1  | ZMYND19P1   | processed_pseudogene               |
| ENSG00000175701.10 | MTLN        | protein_coding                     |
| ENSG00000201863.1  | AC098591.1  | snoRNA                             |
| ENSG00000267198.1  | AC091132.4  | lncRNA                             |
| ENSG00000103490.14 | PYCARD      | protein_coding                     |
| ENSG00000212457.1  | RNU6-644P   | snRNA                              |
| ENSG00000277978.1  | AC010542.5  | lncRNA                             |
| ENSG00000229257.2  | AL807752.2  | lncRNA                             |
| ENSG00000240723.3  | RN7SL382P   | misc_RNA                           |
| ENSG00000264937.1  | AC100830.2  | lncRNA                             |
| ENSG00000264810.1  | MIR4441     | miRNA                              |
| ENSG00000125144.14 | MT1G        | protein_coding                     |
| ENSG00000200959.1  | SNORA74A    | snoRNA                             |
| ENSG00000143374.17 | TARS2       | protein_coding                     |
| ENSG00000256448.5  | AP000763.3  | lncRNA                             |
| ENSG00000237854.3  | LINC00674   | transcribed_unprocessed_pseudogene |
| ENSG00000244391.3  | RN7SL330P   | misc_RNA                           |
| ENSG00000121064.13 | SCPEP1      | protein_coding                     |
| ENSG00000196668.4  | LINC00173   | lncRNA                             |
| ENSG00000183527.12 | PSMG1       | protein_coding                     |
| ENSG00000133250.14 | ZNF414      | protein_coding                     |
| ENSG00000170006.12 | TMEM154     | protein_coding                     |
| ENSG00000221340.1  | RNU6ATAC18P | snRNA                              |
| ENSG00000251703.1  | RNU6-998P   | snRNA                              |
| ENSG00000176383.9  | B3GNT4      | protein_coding                     |
| ENSG00000202071.1  | Y_RNA       | misc_RNA                           |
| ENSG00000274093.1  | AC009032.1  | lncRNA                             |
| ENSG00000177058.12 | SLC38A9     | protein_coding                     |
| ENSG00000234268.1  | AP000936.3  | processed_pseudogene               |
| ENSG00000267203.1  | SNRPGP4     | processed_pseudogene               |
| ENSG00000140563.15 | MCTP2       | protein_coding                     |
| ENSG00000164494.12 | PDSS2       | protein_coding                     |
| ENSG00000252994.1  | RNU6-1231P  | snRNA                              |

|                    |            |                                    |
|--------------------|------------|------------------------------------|
| ENSG00000272831.1  | AC027644.3 | lncRNA                             |
| ENSG00000243015.2  | RN7SL737P  | misc_RNA                           |
| ENSG00000135469.14 | COQ10A     | protein_coding                     |
| ENSG00000250917.1  | AL035458.2 | lncRNA                             |
| ENSG00000183943.6  | PRKX       | protein_coding                     |
| ENSG00000228292.1  | AL512604.1 | processed_pseudogene               |
| ENSG00000226266.6  | AC009961.1 | lncRNA                             |
| ENSG00000115963.13 | RND3       | protein_coding                     |
| ENSG00000223313.1  | RNU6-516P  | snRNA                              |
| ENSG00000228830.1  | AL160408.2 | lncRNA                             |
| ENSG00000223305.1  | RN7SKP30   | misc_RNA                           |
| ENSG00000158163.15 | DZIP1L     | protein_coding                     |
| ENSG00000148700.15 | ADD3       | protein_coding                     |
| ENSG00000214279.13 | SCART1     | protein_coding                     |
| ENSG00000251754.1  | RNU6-999P  | snRNA                              |
| ENSG00000221955.11 | SLC12A8    | protein_coding                     |
| ENSG00000260335.1  | AC133555.4 | unprocessed_pseudogene             |
| ENSG00000224597.10 | SVIL-AS1   | transcribed_unprocessed_pseudogene |
| ENSG00000156983.16 | BRPF1      | protein_coding                     |
| ENSG0000006025.12  | OSBPL7     | protein_coding                     |
| ENSG00000256826.1  | ATP5MFP4   | processed_pseudogene               |
| ENSG00000163960.12 | UBXN7      | protein_coding                     |
| ENSG00000246705.4  | H2AJ       | protein_coding                     |
| ENSG00000066379.15 | POLR1H     | protein_coding                     |
| ENSG00000207820.1  | MIR545     | miRNA                              |
| ENSG00000252414.1  | RNU6-100P  | snRNA                              |
| ENSG00000252554.1  | RNU6-861P  | snRNA                              |
| ENSG00000206603.1  | SNORA22B   | snoRNA                             |
| ENSG00000254829.1  | AP003032.2 | lncRNA                             |
| ENSG00000199700.1  | RNU6-223P  | snRNA                              |
| ENSG00000201162.1  | RNU6-454P  | snRNA                              |
| ENSG00000201709.1  | RNU6-686P  | snRNA                              |
| ENSG00000202445.1  | RNU6-669P  | snRNA                              |
| ENSG00000206631.1  | RNU6-657P  | snRNA                              |
| ENSG00000222051.1  | RNU6-1165P | snRNA                              |
| ENSG00000252941.1  | RNA5SP340  | rRNA_pseudogene                    |
| ENSG00000201076.1  | RNU4-51P   | snRNA                              |
| ENSG00000286811.1  | AL353138.1 | lncRNA                             |
| ENSG00000154124.5  | OTULIN     | protein_coding                     |
| ENSG00000250322.2  | AC026402.1 | processed_pseudogene               |
| ENSG00000100364.19 | KIAA0930   | protein_coding                     |
| ENSG00000222344.1  | RNU6-613P  | snRNA                              |
| ENSG00000233184.7  | AC093157.1 | lncRNA                             |
| ENSG00000102125.16 | TAZ        | protein_coding                     |
| ENSG00000104267.10 | CA2        | protein_coding                     |
| ENSG00000206650.1  | SNORA70G   | snoRNA                             |
| ENSG00000223345.3  | H2BP1      | transcribed_unprocessed_pseudogene |
| ENSG00000014824.14 | SLC30A9    | protein_coding                     |
| ENSG00000275607.1  | AC135507.2 | processed_pseudogene               |
| ENSG00000268521.1  | VN1R83P    | unprocessed_pseudogene             |
| ENSG00000254665.1  | AC091053.1 | lncRNA                             |
| ENSG00000201035.1  | RNA5SP469  | rRNA_pseudogene                    |
| ENSG00000282542.1  | AC008993.1 | TEC                                |
| ENSG00000145901.16 | TNIP1      | protein_coding                     |
| ENSG00000104213.13 | PDGFRL     | protein_coding                     |
| ENSG00000197603.15 | CPLANE1    | protein_coding                     |
| ENSG00000172748.14 | ZNF596     | protein_coding                     |
| ENSG00000235954.7  | TTC28-AS1  | lncRNA                             |

|                    |               |                        |
|--------------------|---------------|------------------------|
| ENSG00000207595.1  | MIR181A2      | miRNA                  |
| ENSG00000280120.1  | AC073857.1    | TEC                    |
| ENSG00000257303.2  | AC073896.2    | lncRNA                 |
| ENSG00000200418.1  | SNORA63B      | snoRNA                 |
| ENSG00000269427.1  | AC024075.3    | lncRNA                 |
| ENSG00000163322.14 | ABRAXAS1      | protein_coding         |
| ENSG00000260708.1  | AL118516.1    | lncRNA                 |
| ENSG00000280242.1  | AL450226.2    | TEC                    |
| ENSG00000271626.1  | H3P42         | processed_pseudogene   |
| ENSG00000165934.13 | CPSF2         | protein_coding         |
| ENSG00000211643.2  | IGLV5-52      | IG_V_gene              |
| ENSG00000215630.6  | GUSBP9        | unprocessed_pseudogene |
| ENSG00000267751.5  | AC009005.1    | lncRNA                 |
| ENSG00000215283.3  | HMGB3P24      | processed_pseudogene   |
| ENSG00000259399.1  | TGIF2-RAB5IF  | protein_coding         |
| ENSG00000259001.3  | AL355075.4    | lncRNA                 |
| ENSG00000263647.1  | BPTFP1        | unprocessed_pseudogene |
| ENSG00000230955.1  | AL929472.2    | lncRNA                 |
| ENSG00000182165.18 | TP53TG1       | lncRNA                 |
| ENSG00000152818.18 | UTRN          | protein_coding         |
| ENSG00000160446.19 | ZDHC12        | protein_coding         |
| ENSG00000229298.1  | TUBB8P1       | processed_pseudogene   |
| ENSG00000222432.1  | Y_RNA         | misc_RNA               |
| ENSG00000143314.12 | MRPL24        | protein_coding         |
| ENSG00000231993.1  | EP300-AS1     | lncRNA                 |
| ENSG00000130772.14 | MED18         | protein_coding         |
| ENSG00000230902.1  | FAM204CP      | processed_pseudogene   |
| ENSG00000259112.2  | NDUFC2-KCTD14 | protein_coding         |
| ENSG00000145217.14 | SLC26A1       | protein_coding         |
| ENSG00000164506.14 | STXBP5        | protein_coding         |
| ENSG00000169371.14 | SNUPN         | protein_coding         |
| ENSG00000103995.14 | CEP152        | protein_coding         |
| ENSG00000260304.1  | AC009088.2    | lncRNA                 |
| ENSG00000200842.1  | Y_RNA         | misc_RNA               |
| ENSG00000223450.1  | AL590632.1    | processed_pseudogene   |
| ENSG00000239453.1  | SIDT1-AS1     | lncRNA                 |
| ENSG00000213963.6  | AC019080.1    | lncRNA                 |
| ENSG00000135250.17 | SRPK2         | protein_coding         |
| ENSG00000118997.14 | DNAH7         | protein_coding         |
| ENSG00000261717.5  | AC009163.5    | protein_coding         |
| ENSG00000114023.15 | FAM162A       | protein_coding         |
| ENSG00000251062.1  | AC025459.1    | processed_pseudogene   |
| ENSG00000279394.1  | AC015871.4    | TEC                    |
| ENSG00000265315.1  | RN7SL199P     | misc_RNA               |
| ENSG00000265411.1  | RN7SL656P     | misc_RNA               |
| ENSG00000235058.1  | ZMYND10-AS1   | lncRNA                 |
| ENSG00000103496.15 | STX4          | protein_coding         |
| ENSG00000171132.14 | PRKCE         | protein_coding         |
| ENSG00000275994.1  | SNORA24       | snoRNA                 |
| ENSG00000234005.3  | GAPDHP22      | processed_pseudogene   |
| ENSG00000127423.11 | AUNIP         | protein_coding         |
| ENSG00000133597.11 | ADCK2         | protein_coding         |
| ENSG00000263756.1  | AL645941.3    | lncRNA                 |
| ENSG00000224463.1  | RPL39P14      | processed_pseudogene   |
| ENSG00000222249.1  | RNU6-262P     | snRNA                  |
| ENSG00000236900.1  | TIMM9P1       | processed_pseudogene   |
| ENSG00000116954.8  | RRAGC         | protein_coding         |
| ENSG00000243333.3  | RN7SL174P     | misc_RNA               |

|                    |             |                                    |
|--------------------|-------------|------------------------------------|
| ENSG00000110169.11 | HPX         | protein_coding                     |
| ENSG00000265749.6  | AC135178.4  | lncRNA                             |
| ENSG00000286161.1  | AC104066.4  | lncRNA                             |
| ENSG00000027697.15 | IFNGR1      | protein_coding                     |
| ENSG00000224946.1  | AC007312.1  | processed_pseudogene               |
| ENSG00000260246.1  | AC000032.1  | lncRNA                             |
| ENSG00000232430.1  | RPL31P15    | processed_pseudogene               |
| ENSG00000163818.17 | LZTFL1      | protein_coding                     |
| ENSG00000171700.14 | RGS19       | protein_coding                     |
| ENSG0000018699.13  | TTC27       | protein_coding                     |
| ENSG00000100478.15 | AP4S1       | protein_coding                     |
| ENSG00000254205.1  | AC009686.1  | lncRNA                             |
| ENSG00000116783.15 | TNNI3K      | protein_coding                     |
| ENSG00000132196.15 | HSD17B7     | protein_coding                     |
| ENSG00000239149.1  | SNORA59A    | snoRNA                             |
| ENSG00000168438.15 | CDC40       | protein_coding                     |
| ENSG00000248161.5  | AC098487.1  | lncRNA                             |
| ENSG00000275185.1  | AC130324.3  | lncRNA                             |
| ENSG00000140057.9  | AK7         | protein_coding                     |
| ENSG00000242173.10 | ARHGDIG     | protein_coding                     |
| ENSG00000255301.1  | AP002893.1  | lncRNA                             |
| ENSG00000276036.1  | RNA5SP440   | rRNA_pseudogene                    |
| ENSG00000238186.1  | AL603839.2  | lncRNA                             |
| ENSG00000119514.7  | GALNT12     | protein_coding                     |
| ENSG00000232136.2  | DUXAP7      | processed_pseudogene               |
| ENSG00000260111.1  | AC012184.1  | lncRNA                             |
| ENSG00000274383.1  | AC103691.1  | lncRNA                             |
| ENSG00000187630.17 | DHRS4L2     | protein_coding                     |
| ENSG00000125954.12 | CHURC1-FNTB | protein_coding                     |
| ENSG00000275857.1  | AC009133.4  | lncRNA                             |
| ENSG00000255686.1  | AC073864.1  | lncRNA                             |
| ENSG00000227540.1  | DNAJC9-AS1  | lncRNA                             |
| ENSG00000253093.1  | RNA5SP179   | rRNA_pseudogene                    |
| ENSG00000248155.1  | CR545473.1  | unprocessed_pseudogene             |
| ENSG00000256148.1  | AP000763.2  | processed_pseudogene               |
| ENSG00000147586.10 | MRPS28      | protein_coding                     |
| ENSG00000269711.1  | AC008763.3  | protein_coding                     |
| ENSG00000232713.2  | RPS12P3     | processed_pseudogene               |
| ENSG00000287779.1  | AL162742.2  | transcribed_unprocessed_pseudogene |
| ENSG00000229299.2  | AL121845.1  | lncRNA                             |
| ENSG00000253229.1  | HIGD1AP6    | processed_pseudogene               |
| ENSG00000278099.1  | RNVU1-2A    | snRNA                              |
| ENSG00000275221.2  | H2AC15      | protein_coding                     |
| ENSG00000247809.9  | NR2F2-AS1   | lncRNA                             |
| ENSG00000287287.1  | AL133476.1  | lncRNA                             |
| ENSG00000074621.14 | SLC24A1     | protein_coding                     |
| ENSG00000182625.3  | AC091046.1  | processed_pseudogene               |
| ENSG00000189283.10 | FHIT        | protein_coding                     |
| ENSG00000159915.12 | ZNF233      | protein_coding                     |
| ENSG00000254463.1  | PPIAP41     | processed_pseudogene               |
| ENSG00000207022.1  | AL162740.1  | snoRNA                             |
| ENSG00000241007.1  | SEPTIN7P6   | processed_pseudogene               |
| ENSG00000239465.1  | AC090543.1  | processed_pseudogene               |
| ENSG00000274561.1  | AC005332.3  | lncRNA                             |
| ENSG00000121988.18 | ZRANB3      | protein_coding                     |
| ENSG00000278017.1  | AC064801.1  | lncRNA                             |
| ENSG00000151575.14 | TEX9        | protein_coding                     |
| ENSG00000221420.2  | SNORA81     | snoRNA                             |

|                    |            |                                  |
|--------------------|------------|----------------------------------|
| ENSG00000214628.3  | NDUFB5P2   | processed_pseudogene             |
| ENSG00000168961.17 | LGALS9     | protein_coding                   |
| ENSG00000047230.15 | CTPS2      | protein_coding                   |
| ENSG00000260252.1  | AC009087.1 | lncRNA                           |
| ENSG00000164051.14 | CCDC51     | protein_coding                   |
| ENSG00000243498.2  | UBA52P5    | processed_pseudogene             |
| ENSG00000144559.10 | TAMM41     | protein_coding                   |
| ENSG00000085760.15 | MTIF2      | protein_coding                   |
| ENSG00000140548.10 | ZNF710     | protein_coding                   |
| ENSG00000226284.1  | ARPC3P1    | processed_pseudogene             |
| ENSG00000178537.10 | SLC25A20   | protein_coding                   |
| ENSG00000272533.1  | SNORA28    | snoRNA                           |
| ENSG00000237036.5  | ZEB1-AS1   | lncRNA                           |
| ENSG00000241217.3  | RN7SL809P  | misc_RNA                         |
| ENSG00000259232.2  | AC105129.1 | processed_pseudogene             |
| ENSG00000262766.1  | AC135050.5 | lncRNA                           |
| ENSG00000287260.1  | AL357075.3 | lncRNA                           |
| ENSG00000244356.3  | RN7SL398P  | misc_RNA                         |
| ENSG00000250950.1  | AC093752.2 | lncRNA                           |
| ENSG00000254484.1  | AP002336.1 | lncRNA                           |
| ENSG00000242375.1  | AL590705.3 | lncRNA                           |
| ENSG00000278590.1  | RN7SL113P  | misc_RNA                         |
| ENSG00000253293.5  | HOXA10     | protein_coding                   |
| ENSG00000223989.1  | AL357140.1 | lncRNA                           |
| ENSG00000153094.24 | BCL2L11    | protein_coding                   |
| ENSG00000152942.19 | RAD17      | protein_coding                   |
| ENSG00000081181.8  | ARG2       | protein_coding                   |
| ENSG00000280317.1  | AL732618.1 | TEC                              |
| ENSG00000115474.7  | KCNJ13     | protein_coding                   |
| ENSG00000142046.15 | TMEM91     | protein_coding                   |
| ENSG00000272155.1  | AC055822.1 | lncRNA                           |
| ENSG00000206706.1  | Y_RNA      | misc_RNA                         |
| ENSG00000206927.1  | Y_RNA      | misc_RNA                         |
| ENSG00000207294.1  | Y_RNA      | misc_RNA                         |
| ENSG00000207425.1  | Y_RNA      | misc_RNA                         |
| ENSG00000089091.16 | DZANK1     | protein_coding                   |
| ENSG00000277143.1  | AC074276.2 | processed_pseudogene             |
| ENSG00000243708.10 | PLA2G4B    | protein_coding                   |
| ENSG00000258531.2  | BANF1P1    | processed_pseudogene             |
| ENSG00000248559.1  | AC109454.2 | lncRNA                           |
| ENSG00000200063.1  | AC061992.1 | snoRNA                           |
| ENSG00000222588.1  | AL355598.1 | snoRNA                           |
| ENSG00000273682.1  | AC109583.3 | processed_pseudogene             |
| ENSG00000231312.7  | MAP4K3-DT  | lncRNA                           |
| ENSG00000262979.1  | AC124319.1 | lncRNA                           |
| ENSG00000101745.17 | ANKRD12    | protein_coding                   |
| ENSG00000259970.1  | AC099668.1 | lncRNA                           |
| ENSG00000273036.3  | AL390726.4 | transcribed_processed_pseudogene |
| ENSG00000166262.16 | FAM227B    | protein_coding                   |
| ENSG00000252355.1  | RN7SKP287  | misc_RNA                         |
| ENSG00000205808.7  | PLPP6      | protein_coding                   |
| ENSG00000255929.5  | AP000943.2 | lncRNA                           |
| ENSG00000246283.2  | AC090510.1 | lncRNA                           |
| ENSG00000154153.13 | RETREG1    | protein_coding                   |
| ENSG00000222057.1  | RNU4-62P   | snRNA                            |
| ENSG00000257957.1  | QRSL1P3    | processed_pseudogene             |
| ENSG00000167874.7  | TMEM88     | protein_coding                   |
| ENSG00000113966.10 | ARL6       | protein_coding                   |

|                    |            |                                    |
|--------------------|------------|------------------------------------|
| ENSG00000151090.20 | THRB       | protein_coding                     |
| ENSG00000173451.7  | THAP2      | protein_coding                     |
| ENSG00000167311.14 | ART5       | protein_coding                     |
| ENSG00000211644.3  | IGLV1-51   | IG_V_gene                          |
| ENSG00000212607.1  | SNORA3B    | snoRNA                             |
| ENSG00000269951.1  | AC090181.2 | lncRNA                             |
| ENSG00000233114.2  | AL358075.3 | processed_pseudogene               |
| ENSG00000276470.1  | AL021155.2 | misc_RNA                           |
| ENSG00000270553.1  | AC011921.3 | processed_pseudogene               |
| ENSG00000189164.15 | ZNF527     | protein_coding                     |
| ENSG00000228663.1  | PSMD10P1   | processed_pseudogene               |
| ENSG00000225551.1  | AL157827.1 | unprocessed_pseudogene             |
| ENSG00000213145.10 | CRIP1      | protein_coding                     |
| ENSG00000244026.6  | FAM86DP    | transcribed_unprocessed_pseudogene |
| ENSG00000149798.5  | CDC42EP2   | protein_coding                     |
| ENSG00000176485.12 | PLAAT3     | protein_coding                     |
| ENSG00000219355.2  | RPL31P52   | processed_pseudogene               |
| ENSG00000204540.11 | PSORS1C1   | protein_coding                     |
| ENSG00000096968.14 | JAK2       | protein_coding                     |
| ENSG00000123643.13 | SLC36A1    | protein_coding                     |
| ENSG00000167130.18 | DOLPP1     | protein_coding                     |
| ENSG00000198040.11 | ZNF84      | protein_coding                     |
| ENSG00000188910.8  | GJB3       | protein_coding                     |
| ENSG00000204816.5  | FGF7P5     | unprocessed_pseudogene             |
| ENSG00000212396.1  | RNA5SP323  | rRNA_pseudogene                    |
| ENSG00000257954.1  | AC125611.2 | processed_pseudogene               |
| ENSG00000265185.6  | SNORD3B-1  | snoRNA                             |
| ENSG00000280400.1  | AC127459.3 | TEC                                |
| ENSG00000234197.1  | ETV5-AS1   | lncRNA                             |
| ENSG00000259191.2  | AC027237.1 | processed_pseudogene               |
| ENSG00000008869.12 | HEATR5B    | protein_coding                     |
| ENSG00000206952.3  | SNORA50A   | snoRNA                             |
| ENSG00000274386.5  | TMEM269    | protein_coding                     |
| ENSG00000110871.15 | COQ5       | protein_coding                     |
| ENSG00000197140.15 | ADAM32     | protein_coding                     |
| ENSG00000239351.1  | NPM1P29    | processed_pseudogene               |
| ENSG00000197375.13 | SLC22A5    | protein_coding                     |
| ENSG00000279672.1  | AP006621.5 | TEC                                |
| ENSG00000160282.14 | FTCD       | protein_coding                     |
| ENSG00000276161.1  | SNORA17B   | snoRNA                             |
| ENSG00000206647.1  | AC007240.1 | snoRNA                             |
| ENSG00000275097.1  | AC024940.5 | lncRNA                             |
| ENSG00000224429.8  | LINC00539  | lncRNA                             |
| ENSG00000125388.20 | GRK4       | protein_coding                     |
| ENSG00000272114.1  | AL136131.3 | lncRNA                             |
| ENSG00000265055.2  | AC145343.1 | lncRNA                             |
| ENSG00000243883.3  | RN7SL419P  | misc_RNA                           |
| ENSG00000273568.1  | AC131009.3 | lncRNA                             |
| ENSG00000263335.1  | AF001548.2 | lncRNA                             |
| ENSG00000233460.1  | RPL35AP31  | processed_pseudogene               |
| ENSG00000268047.1  | AC018766.1 | lncRNA                             |
| ENSG00000271064.1  | AC027644.2 | processed_pseudogene               |
| ENSG00000202434.1  | AC010746.1 | snoRNA                             |
| ENSG00000208772.1  | SNORD94    | snoRNA                             |
| ENSG00000221491.2  | SNORA2C    | snoRNA                             |
| ENSG00000258761.1  | AC116903.1 | lncRNA                             |
| ENSG00000212163.6  | SNORD91A   | snoRNA                             |
| ENSG00000273733.1  | AC011472.4 | lncRNA                             |



|                    |            |                                    |
|--------------------|------------|------------------------------------|
| ENSG00000235077.1  | AC073842.1 | lncRNA                             |
| ENSG00000233382.7  | NKAPP1     | transcribed_processed_pseudogene   |
| ENSG00000270075.1  | AL162742.1 | lncRNA                             |
| ENSG00000266160.2  | RN7SL612P  | misc_RNA                           |
| ENSG00000207165.1  | SNORA70    | snoRNA                             |
| ENSG00000287525.1  | AL627308.3 | lncRNA                             |
| ENSG00000223807.1  | BOLA3P4    | processed_pseudogene               |
| ENSG00000274020.4  | LINC01138  | lncRNA                             |
| ENSG00000118515.11 | SGK1       | protein_coding                     |
| ENSG00000280136.2  | AC240565.2 | lncRNA                             |
| ENSG00000243896.4  | OR2A7      | protein_coding                     |
| ENSG00000102312.23 | PORCN      | protein_coding                     |
| ENSG00000264829.1  | AC087749.2 | lncRNA                             |
| ENSG00000277688.1  | AC243585.2 | lncRNA                             |
| ENSG00000262003.1  | AC087392.1 | lncRNA                             |
| ENSG00000253911.1  | AP003467.1 | lncRNA                             |
| ENSG00000287168.1  | AL512625.3 | lncRNA                             |
| ENSG00000163888.4  | CAMK2N2    | protein_coding                     |
| ENSG00000197813.6  | AC011450.1 | lncRNA                             |
| ENSG00000198618.5  | PPIAP22    | processed_pseudogene               |
| ENSG00000229644.6  | NAMPTP1    | processed_pseudogene               |
| ENSG00000238251.2  | NSA2P7     | processed_pseudogene               |
| ENSG00000246889.2  | AP000487.1 | lncRNA                             |
| ENSG00000135932.11 | CAB39      | protein_coding                     |
| ENSG00000125703.15 | ATG4C      | protein_coding                     |
| ENSG00000232667.10 | AC004862.1 | lncRNA                             |
| ENSG00000138079.14 | SLC3A1     | protein_coding                     |
| ENSG00000261385.1  | AC009088.3 | lncRNA                             |
| ENSG00000187187.14 | ZNF546     | protein_coding                     |
| ENSG00000201806.1  | RNU4-8P    | snRNA                              |
| ENSG00000267379.1  | AC008569.1 | lncRNA                             |
| ENSG00000258695.2  | AC005225.3 | lncRNA                             |
| ENSG00000250271.2  | AC068647.2 | transcribed_unprocessed_pseudogene |
| ENSG00000264384.2  | RN7SL431P  | misc_RNA                           |
| ENSG00000087303.18 | NID2       | protein_coding                     |
| ENSG00000171621.14 | SPSB1      | protein_coding                     |
| ENSG00000277423.1  | AC069234.5 | lncRNA                             |
| ENSG00000110042.8  | DTX4       | protein_coding                     |
| ENSG00000253668.1  | AC103778.1 | processed_pseudogene               |
| ENSG00000169981.11 | ZNF35      | protein_coding                     |
| ENSG00000258526.7  | AL049828.1 | lncRNA                             |
| ENSG00000266111.2  | AC068025.2 | lncRNA                             |
| ENSG00000102181.21 | CD99L2     | protein_coding                     |
| ENSG00000254483.1  | SUGT1P4    | unprocessed_pseudogene             |
| ENSG00000239884.3  | RN7SL608P  | misc_RNA                           |
| ENSG00000144357.18 | UBR3       | protein_coding                     |
| ENSG00000201558.1  | RNVU1-6    | snRNA                              |
| ENSG00000254459.1  | AP002812.2 | lncRNA                             |
| ENSG00000248275.2  | TRIM52-AS1 | lncRNA                             |
| ENSG00000145723.17 | GIN1       | protein_coding                     |
| ENSG00000279718.1  | SNX18P12   | processed_pseudogene               |
| ENSG00000274976.1  | AC087588.1 | lncRNA                             |
| ENSG00000274985.1  | PTCHD3P1   | unprocessed_pseudogene             |
| ENSG00000201564.1  | RN7SKP50   | misc_RNA                           |
| ENSG00000279691.1  | AC113410.3 | TEC                                |
| ENSG00000244559.1  | AC091179.2 | processed_pseudogene               |
| ENSG00000196810.5  | CTBP1-DT   | lncRNA                             |
| ENSG00000274628.5  | AL669942.1 | transcribed_unprocessed_pseudogene |

|                    |             |                                    |
|--------------------|-------------|------------------------------------|
| ENSG00000285794.1  | AL031281.1  | transcribed_processed_pseudogene   |
| ENSG00000151500.15 | THYN1       | protein_coding                     |
| ENSG00000271853.5  | AL162258.1  | lncRNA                             |
| ENSG00000269688.1  | AC008982.2  | lncRNA                             |
| ENSG00000131779.11 | PEX11B      | protein_coding                     |
| ENSG00000124171.9  | PARD6B      | protein_coding                     |
| ENSG00000218896.1  | TUBB8P2     | processed_pseudogene               |
| ENSG00000244134.1  | RPS12P20    | processed_pseudogene               |
| ENSG00000151773.13 | CCDC122     | protein_coding                     |
| ENSG00000235088.1  | AL031667.2  | processed_pseudogene               |
| ENSG00000148848.14 | ADAM12      | protein_coding                     |
| ENSG00000112394.17 | SLC16A10    | protein_coding                     |
| ENSG00000230082.1  | PRRT3-AS1   | lncRNA                             |
| ENSG00000224629.1  | AC004975.1  | processed_pseudogene               |
| ENSG00000281501.1  | SEPSECS-AS1 | lncRNA                             |
| ENSG00000253492.1  | CDH12P3     | unprocessed_pseudogene             |
| ENSG00000254335.1  | CDH12P1     | unprocessed_pseudogene             |
| ENSG00000111215.12 | PRR4        | protein_coding                     |
| ENSG00000259258.1  | AC013553.1  | processed_pseudogene               |
| ENSG00000080371.6  | RAB21       | protein_coding                     |
| ENSG00000143375.15 | CGN         | protein_coding                     |
| ENSG00000212769.5  | HMG2P8      | processed_pseudogene               |
| ENSG00000281195.1  | AC007878.1  | lncRNA                             |
| ENSG00000213964.3  | CHCHD4P4    | processed_pseudogene               |
| ENSG00000256747.1  | AC009511.2  | lncRNA                             |
| ENSG00000158966.16 | CACHD1      | protein_coding                     |
| ENSG00000280543.1  | ASAP1-IT2   | lncRNA                             |
| ENSG00000228779.1  | Z69666.1    | lncRNA                             |
| ENSG00000258068.2  | AC079600.3  | lncRNA                             |
| ENSG00000253908.1  | AC104115.2  | processed_pseudogene               |
| ENSG00000244556.1  | ODCP        | processed_pseudogene               |
| ENSG00000239257.1  | RPL23AP1    | transcribed_processed_pseudogene   |
| ENSG00000270409.1  | AC090950.1  | transcribed_unprocessed_pseudogene |
| ENSG00000241204.1  | AC022730.2  | processed_pseudogene               |
| ENSG00000273107.1  | AL512598.1  | lncRNA                             |
| ENSG00000019485.13 | PRDM11      | protein_coding                     |
| ENSG00000103254.10 | ANTKMT      | protein_coding                     |
| ENSG00000276620.1  | AL591516.1  | processed_pseudogene               |
| ENSG00000249471.8  | ZNF324B     | protein_coding                     |
| ENSG00000143942.5  | CHAC2       | protein_coding                     |
| ENSG00000266469.2  | AC005288.1  | lncRNA                             |
| ENSG00000235663.1  | SAPCD1-AS1  | lncRNA                             |
| ENSG00000267128.2  | RNF157-AS1  | lncRNA                             |
| ENSG00000273061.1  | CDC37L1-DT  | lncRNA                             |
| ENSG00000226721.2  | EEF1DP2     | processed_pseudogene               |
| ENSG00000267757.4  | EML2-AS1    | lncRNA                             |
| ENSG00000173011.12 | TADA2B      | protein_coding                     |
| ENSG00000275759.1  | AC026367.3  | lncRNA                             |
| ENSG00000254263.1  | AC022973.4  | lncRNA                             |
| ENSG00000275129.1  | AC243994.1  | processed_pseudogene               |
| ENSG00000153721.19 | CNKSR3      | protein_coding                     |
| ENSG00000245571.7  | FAM111A-DT  | lncRNA                             |
| ENSG00000196656.7  | AC004057.1  | transcribed_processed_pseudogene   |
| ENSG00000261087.1  | ZNNT1       | lncRNA                             |
| ENSG00000240695.1  | AC117382.1  | processed_pseudogene               |
| ENSG00000241549.8  | GUSBP2      | transcribed_unprocessed_pseudogene |
| ENSG00000265337.1  | AC079336.3  | lncRNA                             |
| ENSG00000119686.10 | FLVCR2      | protein_coding                     |

|                    |                 |                |
|--------------------|-----------------|----------------|
| ENSG00000107014.9  | RLN2            | protein_coding |
| ENSG00000125384.7  | PTGER2          | protein_coding |
| ENSG00000277382.1  | AC005837.4      | lncRNA         |
| ENSG00000078687.17 | TNRC6C          | protein_coding |
| ENSG00000277701.5  | AC159540.2      | lncRNA         |
| ENSG00000252917.1  | SNORA74         | snoRNA         |
| ENSG00000265073.1  | AC010761.2      | lncRNA         |
| ENSG00000241211.1  | IQCJ-SCHIP1-AS1 | lncRNA         |

---

Supplementary Table S9. Sequences of siRNAs and shRNAs used in this study

| Name                | Sequence                     |
|---------------------|------------------------------|
| Control siRNA       |                              |
| si-TM4SF1-AS1-1     | 5'-CCAUCAGUUGGGAGUUGAAGA-3'  |
| si-TM4SF1-AS1-2     | 5'-GCCAAGUGUCCGAGAUGCAAC-3'  |
| si-TM4SF1-1         | 5'-CAAACGAUGUGCGAUGCUU-3'    |
| si-TM4SF1-2         | 5'-GUGCGAUGCUUUCUUCUGUTT-3'  |
| si-Pur- $\alpha$ -1 | 5'-CCACCUAUCGCAACUCCAUTT-3'  |
| si-Pur- $\alpha$ -2 | 5'-GCUACUGCAGGGUGAGGAATT-3'  |
| si-YB-1-1           | 5'-CCUAUGGGCGUCGACCACATT-3'  |
| si-YB-1-2           | 5'-GUUCCAGUUCAAGGCAGUATT-3'  |
| si-RACK1            | 5'-GAUAAGACCAUCAUCAUGUGG-3'  |
| Control shRNA       |                              |
| sh-TM4SF1AS1-1      | 5'-TCCTAAGGTTAAGTCGCCCTCG-3' |
| sh-TM4SF1AS1-2      | 5'-CCATCAGTTGGGAGTTGAAGA-3'  |
| sh-TM4SF1AS1-2      | 5'-GCCAAGTGTCCGAGATGCAAC-3'  |

Supplementary Table S10. Genes analyzed by targeted sequencing

GC-related genes

APC  
ARID1A  
CDH1  
MUC6  
KRAS  
PIC3CA  
SMAD3  
TP53

LncRNA genes

DLEU1  
DLEU1-AS1  
TM4SF1-AS1  
NEAT1  
PVT1  
TCONS\_00006510  
TCONS\_00007524  
TCONS\_00009689  
TCONS\_00010939  
TCONS\_00011145  
TCONS\_00011229  
TCONS\_00017242  
TCONS\_00021627  
TCONS\_00021692  
TCONS\_00024597  
TCONS\_00029727

Genes located in the antisense of lncRNA genes

ERBB2IP  
MLLT4  
SEMA3B  
TM4SF1  
UBE2L5P

Supplementary Table S11. Sequences of probes used in ChIRP analysis

| Probe name   | Sequence                       |
|--------------|--------------------------------|
| TM4SF1-AS1-1 | 5'-ACAGTCAATGCCTTGTTCAA-bio-3' |
| TM4SF1-AS1-2 | 5'-TCTTTCAAAGCCTCAACCAG-bio-3' |
| TM4SF1-AS1-3 | 5'-GCCCCAGGTTGTAAATTTAA-bio-3' |
| TM4SF1-AS1-4 | 5'-CAGGGACGCTGAACACTGAA-bio-3' |
| TM4SF1-AS1-5 | 5'-CAGGAACCCTGAACAGTTTT-bio-3' |
| TM4SF1-AS1-6 | 5'-CCCAACCTTTCTGTAAACAG-bio-3' |
| TM4SF1-AS1-7 | 5'-AATCAGCTCTGAGCAAACCA-bio-3' |
| LacZ-1       | 5'-GCGTTAAAGTTGTTCTGCTT-bio-3' |
| LacZ-2       | 5'-ATGCCGTGGGTTTCAATATT-bio-3' |
| LacZ-3       | 5'-GTAGTTCAGGCAGTTCAATC-bio-3' |
| LacZ-4       | 5'-TTTTTGACACCAGACCAACT-bio-3' |

bio, biotin
